# Supplementary material
Source: PubMed Central journal article supplement (PMC6072283)

**Novel alkyne-azide cycloaddition analogues of dehydrozingerone as potential anti-prostate cancer inhibitors via PI3K/Akt/NF- $\kappa$ B pathway.**

Chetan Kumar<sup>a,¶</sup>, Reyaz Ur Rasool<sup>b,1,¶</sup>, Zainab Iqra<sup>b</sup>, Yedukondalu Nalli<sup>a</sup>, Naresh. K Satti<sup>a</sup>, Neha Sharma<sup>a</sup>, Prabhu Dutt<sup>a</sup>, Sumit G. Gandhi<sup>c</sup>, Anindya Goswami<sup>b,\*,1</sup>, Asif Ali<sup>a,\*,1</sup>

<sup>a</sup>*Natural Product Chemistry Division, CSIR-Indian Institute of Integrative Medicine, Canal Road, Jammu 180001, India.*

<sup>b</sup>*Pharmacology Division, CSIR-Indian Institute of Integrative Medicine, Canal Road, Jammu 180001, India.*

<sup>c</sup>*Plant Biotechnology and System Biology Division, CSIR-Indian Institute of Integrative Medicine, Canal Road, Jammu 180001, India.*

<sup>1</sup>*Academy of Scientific and Innovative Research, New Delhi, India*

<sup>¶</sup>*Contributed equally*

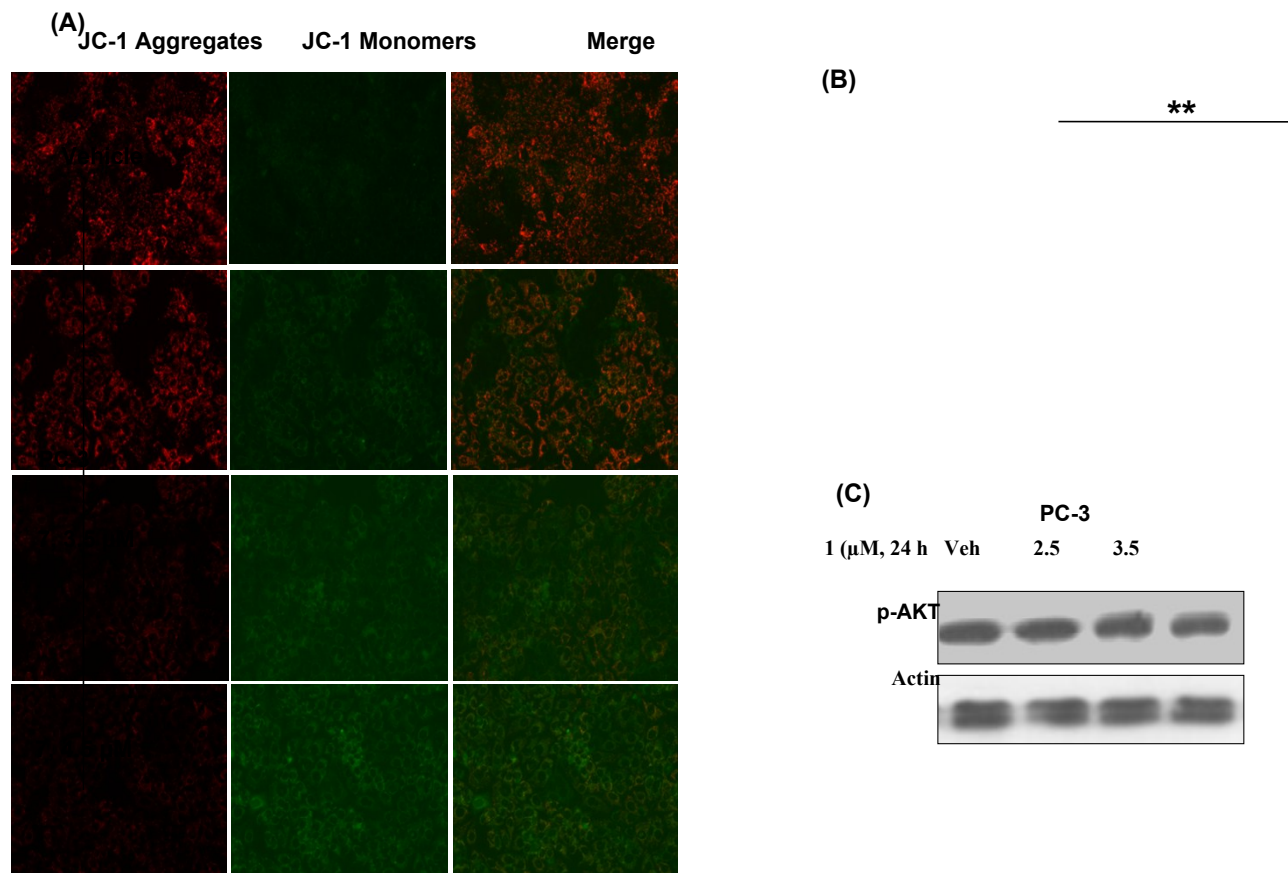

**Supplementary Figure. 1).** Apoptotic effect of compound 7. (A) PC-3 cells, after the indicated treatment for 24 h, were stained with JC-1 dye to check the mitochondrial membrane potential loss. (B) Caspase glow assay was carried out to check the caspase 3/7 activity in PC-3 cells, after the cells were treated for the set time point. (C) PC-3 cells were treated with indicated concentrations of compound 7 and analysed for phospho-AKT (p-AKT) through western blotting. Data from three independent experiments were subjected to statistical analysis. SD ± \*\* $P < 0.01$ .

# HPLC and HRESIMS of 1:

## NPC DIVISION IIIM JAMMU

Reported by User: System

Project Name: NP

### SAMPLE INFORMATION

|                   |              |                     |                                 |
|-------------------|--------------|---------------------|---------------------------------|
| Sample Name:      | Sample-15    | Acquired By:        | System                          |
| Sample Type:      | Unknown      | Date Acquired:      | 9/29/2015 10:04:30 AM           |
| Vial:             | 14           | Acq. Method Set:    | Belerica 1                      |
| Injection #:      | 1            | Date Processed:     | 10/7/2015 10:50:06 AM           |
| Injection Volume: | 10.00 ul     | Processing Method:  | Purity profile                  |
| Run Time:         | 75.0 Minutes | Channel Name:       | W2996 335.0nm-1.2               |
| Sample Set Name:  | Echinacea    | Proc. Chnl. Descr.: | W2996 PDA 335.0 nm at 1.2       |
| column_name:      | RP-18,5um    | Flow rate:          | 0.6 ml/min                      |
|                   |              | Sample conc:        |                                 |
|                   |              | Mobile phase:       | ACN:1.5%AcOH in Water(Gradient) |

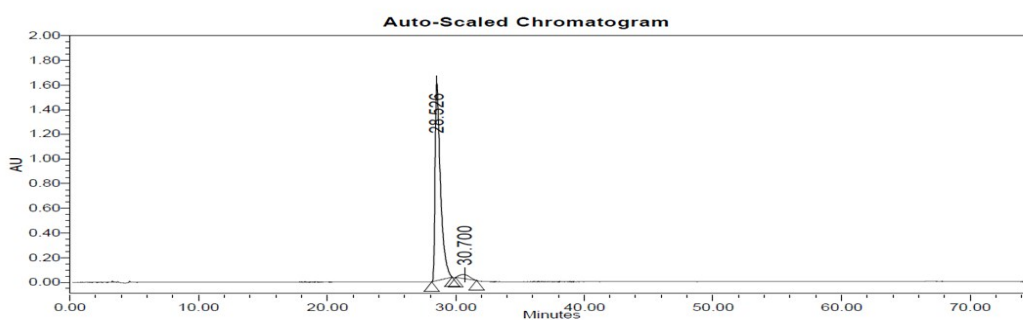

|   | RT     | Area (μV*sec) | % Area | Height (μV) |
|---|--------|---------------|--------|-------------|
| 1 | 28.526 | 47165894      | 96.36  | 1600274     |
| 2 | 30.700 | 1781087       | 3.64   | 32352       |

### Qualitative Compound Report

Data File: DHZ.d  
 Sample Type: Sample  
 Instrument Name: Instrument 1  
 Acq Method: vishal\_12-01-13.m  
 IRM Calibration Status: Success  
 Comment:

Sample Name: DHZ  
 Position: Vial 35  
 User Name:  
 Acquired Time: 19-09-2015 PM 1:17:00  
 DA Method: daily\_report.m

Sample Group: Info.  
 Acquisition SW: 6200 series TOF/6500 series  
 Version: Q-TOF B.05.01 (B5125)

| Compound Label     | RT    | Mass     | Formula    | MFG Formula | MFG Diff (ppm) | DB Formula |
|--------------------|-------|----------|------------|-------------|----------------|------------|
| Cpd 13: C11 H12 O3 | 0.341 | 192.0791 | C11 H12 O3 | C11 H12 O3  | -2.37          | C11 H12 O3 |

| Compound Label     | m/z      | RT    | Algorithm                 | Mass     |
|--------------------|----------|-------|---------------------------|----------|
| Cpd 13: C11 H12 O3 | 193.0863 | 0.341 | Find by Molecular Feature | 192.0791 |

MFE MS Spectrum

Cpd 13: C11 H12 O3: +ESI MFE Spectrum (0.126-0.576 min) Frag=135.0V DHZ.d

# <sup>1</sup>H and <sup>13</sup>C NMR of 1:

16-jun-npc-p2  
DHZ

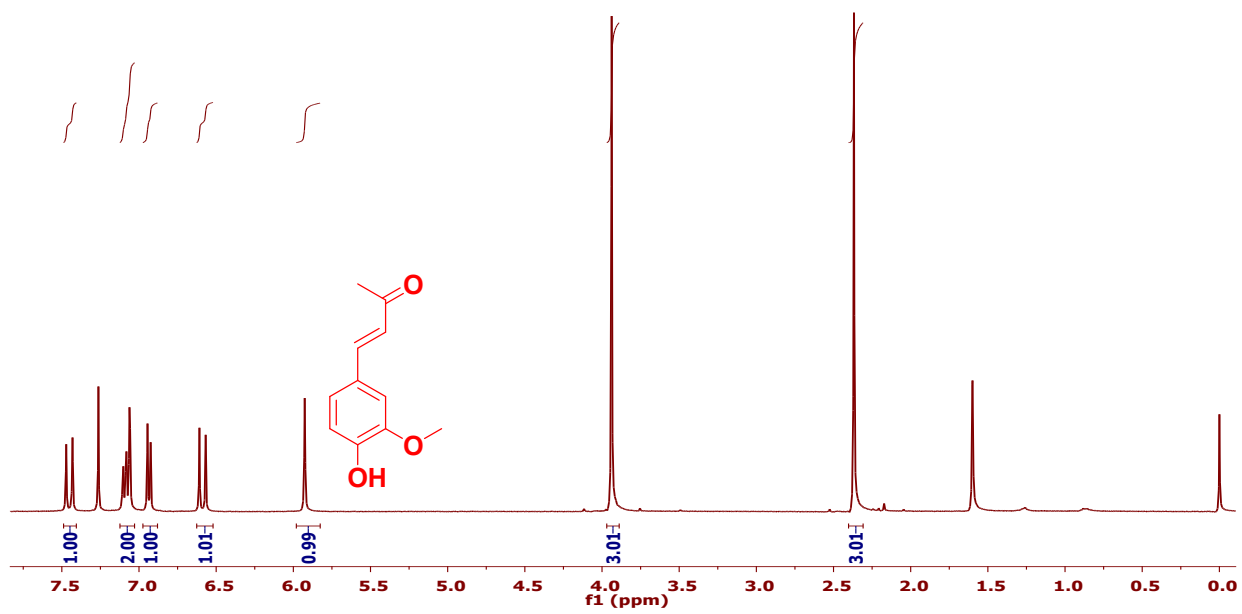

23-feb-13-chetan  
DHZ

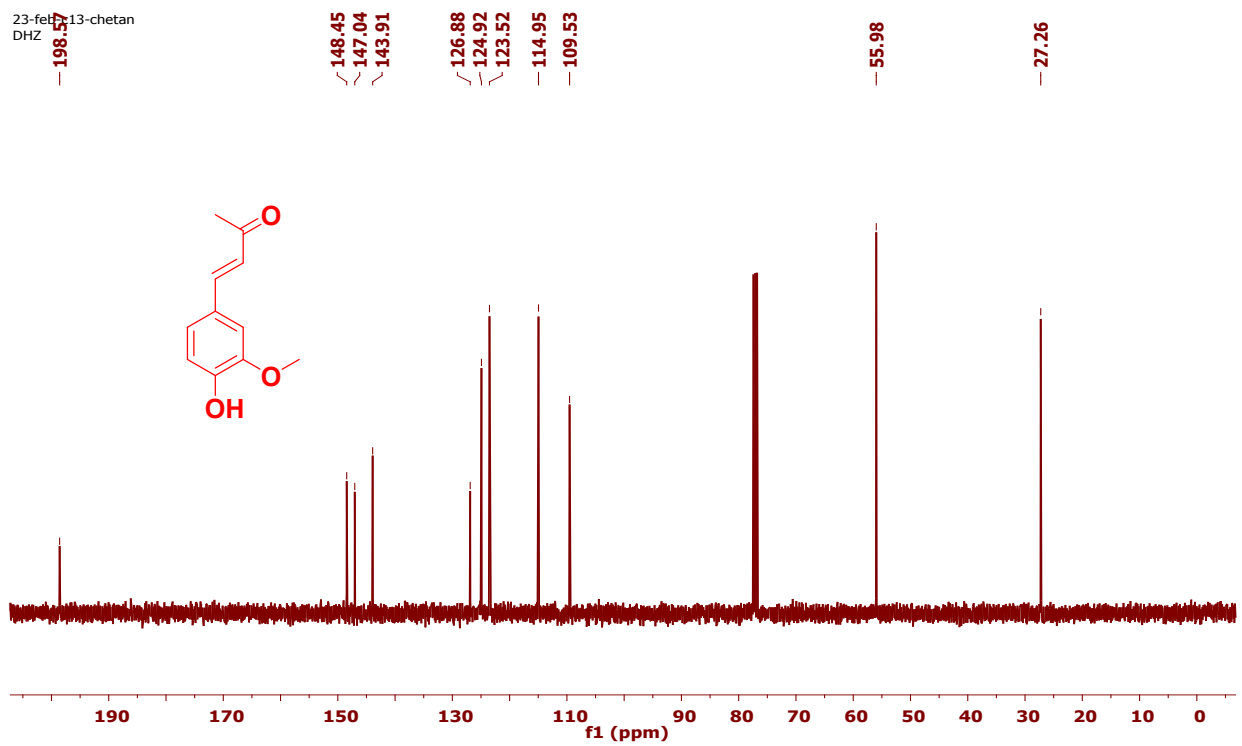

## HPLC and HRESIMS of 2:

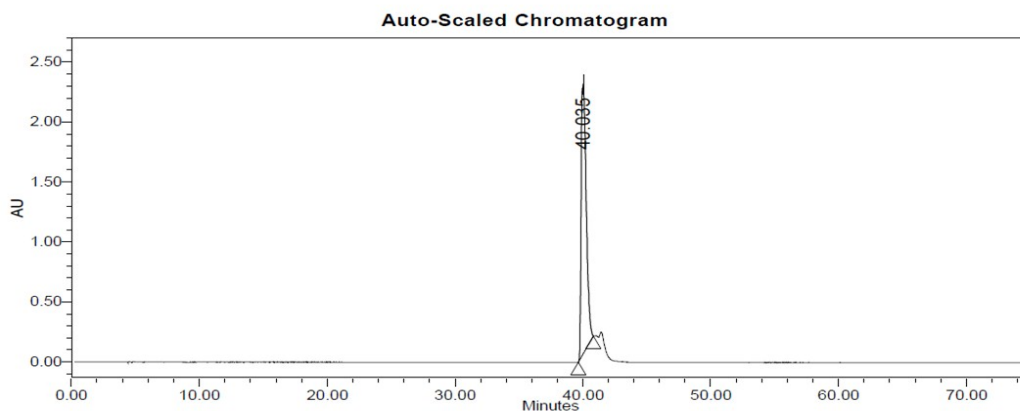

|   | RT     | Area<br>( $\mu\text{V}\cdot\text{sec}$ ) | % Area | Height<br>( $\mu\text{V}$ ) |
|---|--------|------------------------------------------|--------|-----------------------------|
| 1 | 40.035 | 62392418                                 | 100.00 | 2237236                     |

### Qualitative Compound Report

|                               |                   |                      |                       |
|-------------------------------|-------------------|----------------------|-----------------------|
| <b>Data File</b>              | PRO-Br.d          | <b>Sample Name</b>   | PRO-Br                |
| <b>Sample Type</b>            | Sample            | <b>Position</b>      | Vial 31               |
| <b>Instrument Name</b>        | Instrument 1      | <b>User Name</b>     |                       |
| <b>Acq Method</b>             | vishal_12-01-13.m | <b>Acquired Time</b> | 02-03-2017 PM 3:10:24 |
| <b>IRM Calibration Status</b> | Success           | <b>DA Method</b>     | daily_report.m        |
| <b>Comment</b>                |                   |                      |                       |

|                       |                             |              |
|-----------------------|-----------------------------|--------------|
| <b>Sample Group</b>   |                             | <b>Info.</b> |
| <b>Acquisition SW</b> | 6200 series TOF/6500 series |              |
| <b>Version</b>        | Q-TOF B.05.01 (B5125)       |              |

#### Compound Table

| Compound Label     | RT  | Mass    | Formula    | MFG Formula | MFG Diff (ppm) | DB Formula |
|--------------------|-----|---------|------------|-------------|----------------|------------|
| Cpd 33: C14 H14 O3 | 0.3 | 230.094 | C14 H14 O3 | C14 H14 O3  | 1.17           | C14 H14 O3 |

| Compound Label     | m/z      | RT  | Algorithm                 | Mass    |
|--------------------|----------|-----|---------------------------|---------|
| Cpd 33: C14 H14 O3 | 231.1013 | 0.3 | Find by Molecular Feature | 230.094 |

#### MFE MS Spectrum

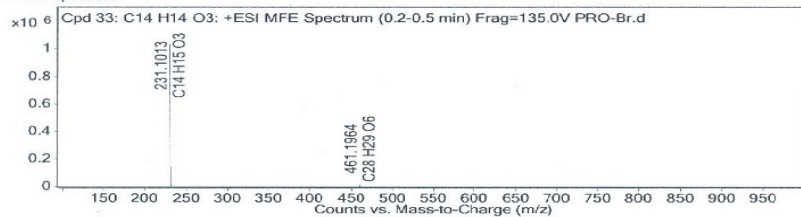

#### MS Spectrum Peak List

| m/z      | z | Abund      | Formula    | Ion     |
|----------|---|------------|------------|---------|
| 231.1013 | 1 | 1036604.69 | C14 H15 O3 | (M+H)+  |
| 232.1048 | 1 | 140231.11  | C14 H15 O3 | (M+H)+  |
| 233.1087 | 1 | 17586.13   | C14 H15 O3 | (M+H)+  |
| 461.1964 | 1 | 9484.1     | C28 H29 O6 | (2M+H)+ |
| 462.2004 | 1 | 3055.12    | C28 H29 O6 | (2M+H)+ |

#### Predicted Isotope Match Table

| Isotope | m/z      | Calc m/z | Diff (ppm) | Abund % | Calc Abund % | Abund Sum % | Calc Abund Sum % |
|---------|----------|----------|------------|---------|--------------|-------------|------------------|
| 1       | 231.1013 | 231.1016 | 1.38       | 100     | 100          | 86.66       | 85.25            |
| 2       | 232.1048 | 232.105  | 0.55       | 13.53   | 15.43        | 11.72       | 13.15            |
| 3       | 233.1087 | 233.1075 | -5.33      | 1.7     | 1.72         | 1.47        | 1.47             |
| 4       | 234.1134 | 234.1101 | -14.03     | 0.16    | 0.14         | 0.14        | 0.12             |

# <sup>1</sup>H and <sup>13</sup>C NMR of 2:

20-jan-npc-p2  
DHZ-PRO-BR

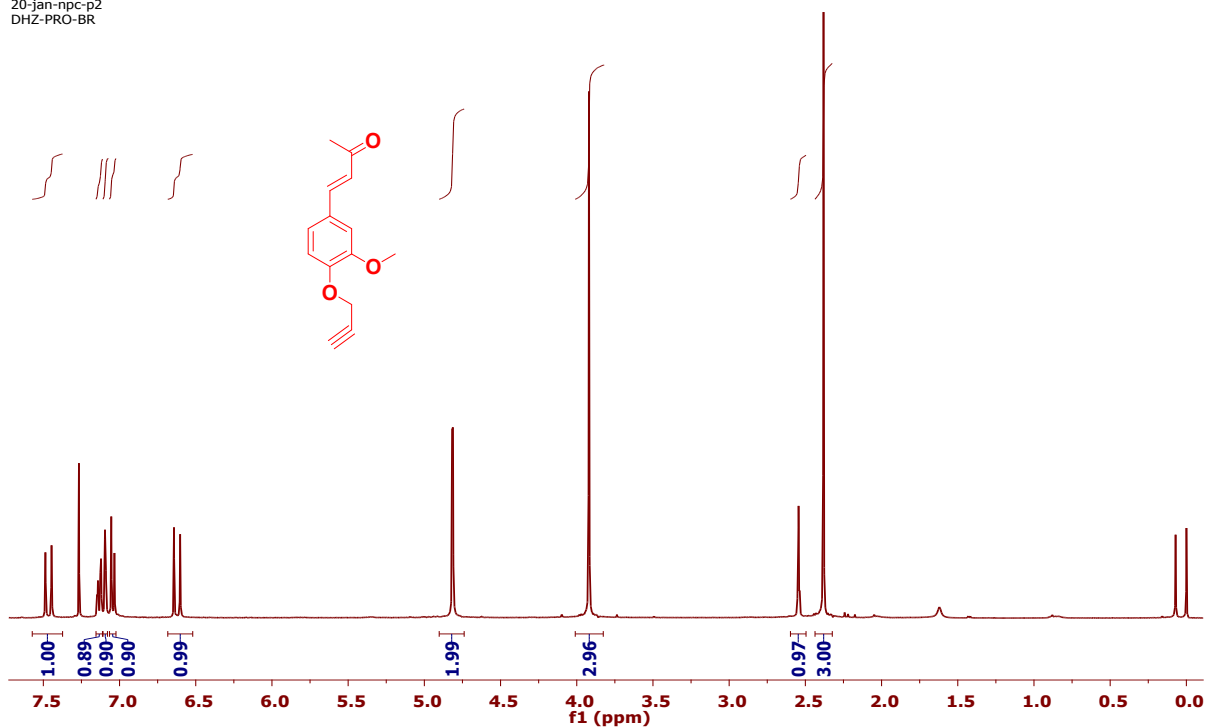

DHZ-PRO-BR c13  
DHZ-PRO-BR

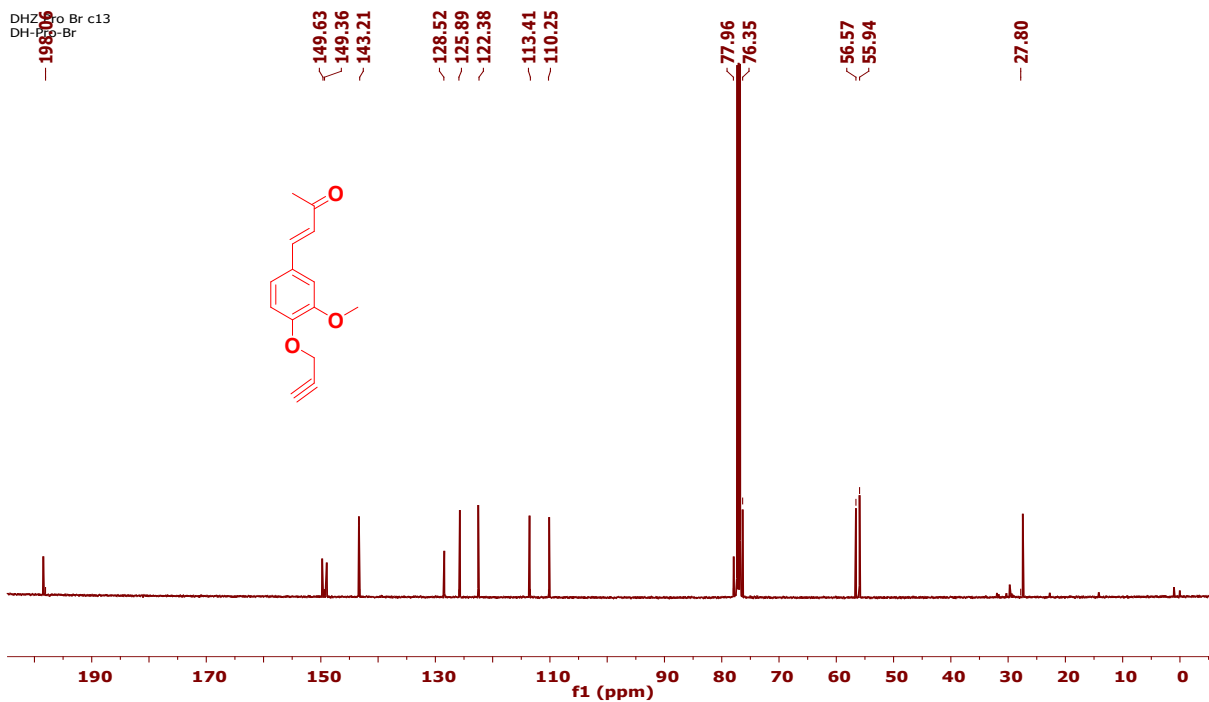

# HPLC and HRESIMS of 3

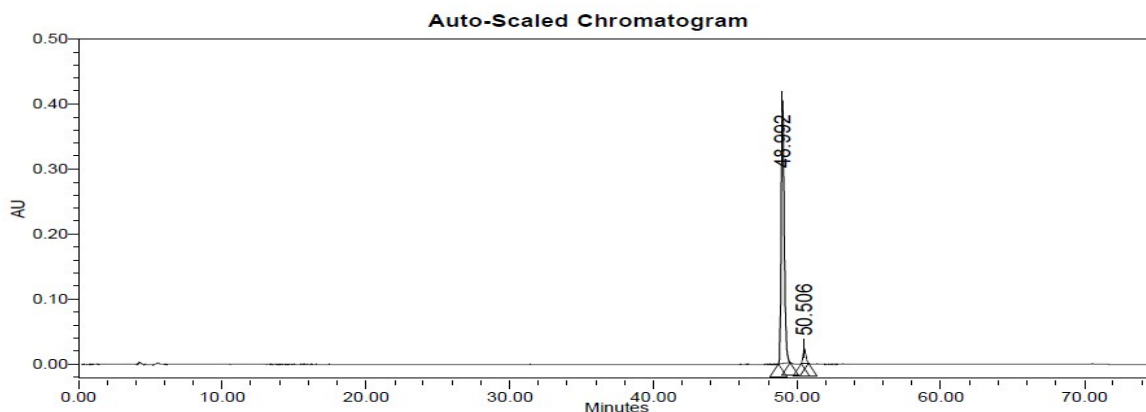

|   | RT     | Area (μV*sec) | % Area | Height (μV) |
|---|--------|---------------|--------|-------------|
| 1 | 48.992 | 5814422       | 94.78  | 404589      |
| 2 | 50.506 | 320109        | 5.22   | 23075       |

## Qualitative Compound Report

|                               |                   |                      |                       |
|-------------------------------|-------------------|----------------------|-----------------------|
| <b>Data File</b>              | 2,6-DIF-N3.d      | <b>Sample Name</b>   | 2,6-DIF-N3            |
| <b>Sample Type</b>            | Sample            | <b>Position</b>      | Vial 30               |
| <b>Instrument Name</b>        | Instrument 1      | <b>User Name</b>     |                       |
| <b>Acq Method</b>             | vishal_12-01-13.m | <b>Acquired Time</b> | 02-03-2017 PM 3:06:05 |
| <b>IRM Calibration Status</b> | Success           | <b>DA Method</b>     | daily_report.m        |
| <b>Comment</b>                |                   |                      |                       |

|                       |                             |              |
|-----------------------|-----------------------------|--------------|
| <b>Sample Group</b>   |                             | <b>Info.</b> |
| <b>Acquisition SW</b> | 6200 series TOF/6500 series |              |
| <b>Version</b>        | Q-TOF B.05.01 (B5125)       |              |

### Compound Table

| Compound Label           | RT  | Mass     | Formula          | MFG Formula      | MFG Diff (ppm) | DB Formula       |
|--------------------------|-----|----------|------------------|------------------|----------------|------------------|
| Cpd 21: C20 H31 F2 N2 O3 | 0.3 | 385.2307 | C20 H31 F2 N2 O3 | C20 H31 F2 N2 O3 | -1.18          | C20 H31 F2 N2 O3 |

| Compound Label           | m/z     | RT  | Algorithm                 | Mass     |
|--------------------------|---------|-----|---------------------------|----------|
| Cpd 21: C20 H31 F2 N2 O3 | 386.238 | 0.3 | Find by Molecular Feature | 385.2307 |

### MFE MS Spectrum

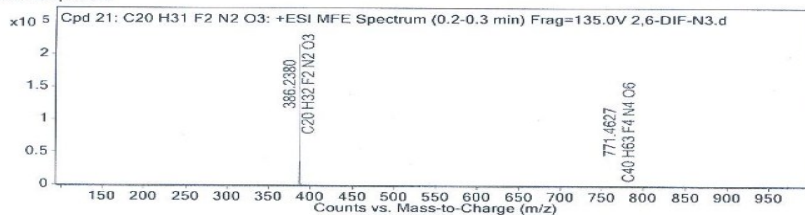

### MS Spectrum Peak List

| m/z      | z | Abund     | Formula          | Ion     |
|----------|---|-----------|------------------|---------|
| 386.238  | 1 | 215126.67 | C20 H32 F2 N2 O3 | (M+H)+  |
| 387.2405 | 1 | 36599.47  | C20 H32 F2 N2 O3 | (M+H)+  |
| 388.2509 | 1 | 2904.31   | C20 H32 F2 N2 O3 | (M+H)+  |
| 389.2524 | 1 | 577.94    | C20 H32 F2 N2 O3 | (M+H)+  |
| 771.4627 | 1 | 294.13    | C40 H63 F4 N4 O6 | (2M+H)+ |

### Predicted Isotope Match Table

| Isotope | m/z      | Calc m/z | Diff (ppm) | Abund % | Calc Abund % | Abund Sum % | Calc Abund Sum % |
|---------|----------|----------|------------|---------|--------------|-------------|------------------|
| 1       | 386.238  | 386.2376 | -1.21      | 100     | 100          | 84.29       | 79.2             |
| 2       | 387.2405 | 387.2408 | 0.7        | 17.01   | 22.84        | 14.34       | 18.09            |
| 3       | 388.2509 | 388.2435 | -19.07     | 1.35    | 3.11         | 1.14        | 2.46             |
| 4       | 389.2524 | 389.2462 | -16.02     | 0.27    | 0.31         | 0.23        | 0.25             |

--- End Of Report ---



# <sup>1</sup>H and <sup>13</sup>C NMR of 3:

2,6-diF-N3 NMR  
2,6diF-N3

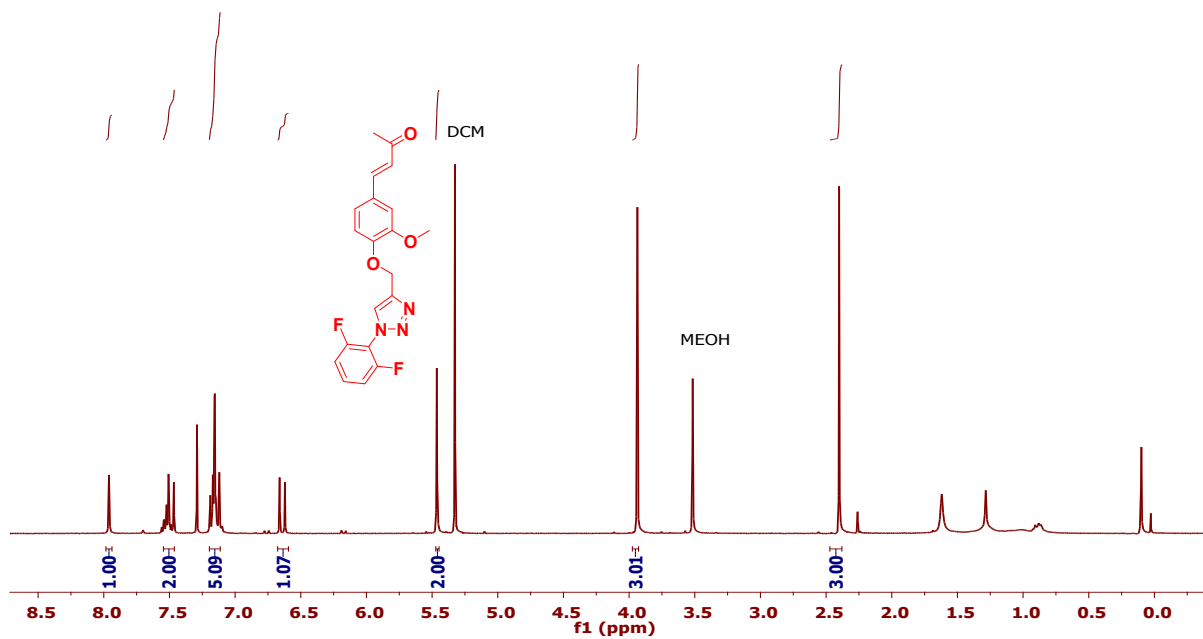

2,6-diF-N3 NMR  
2,6diF-N3

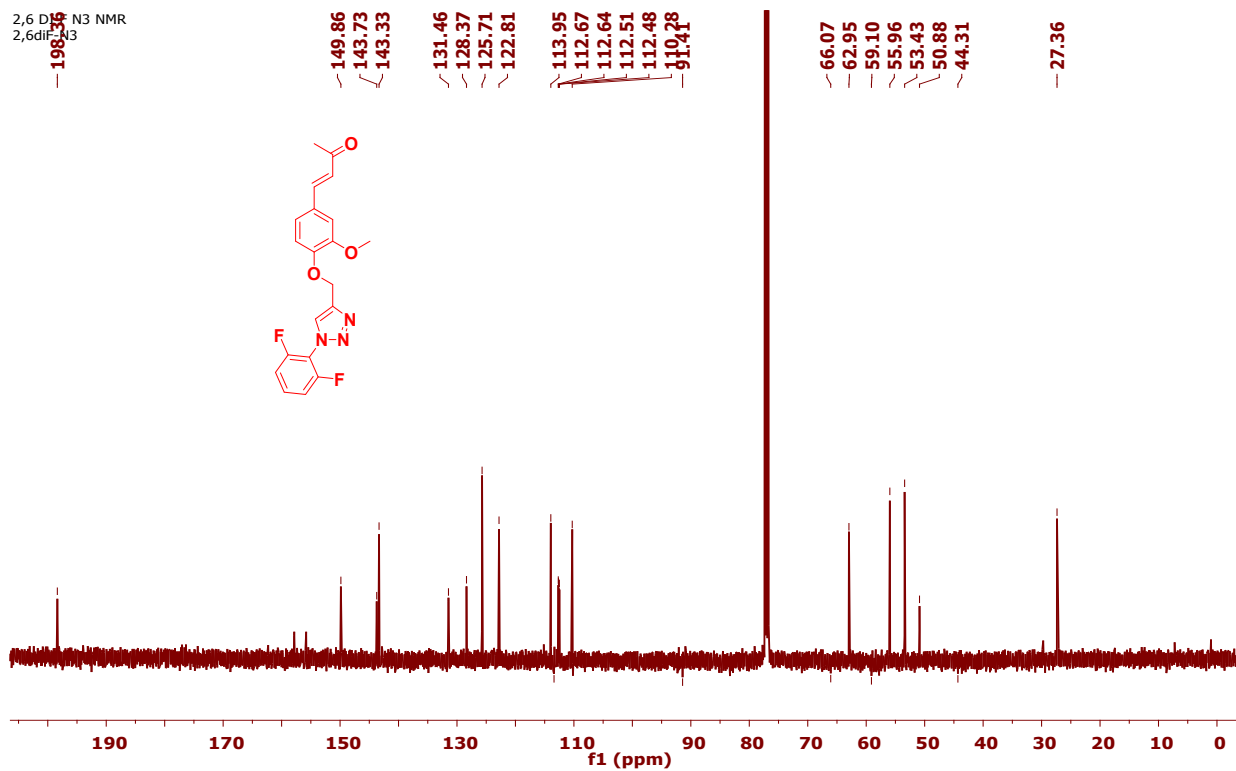



# HPLC and HRESIMS of 4

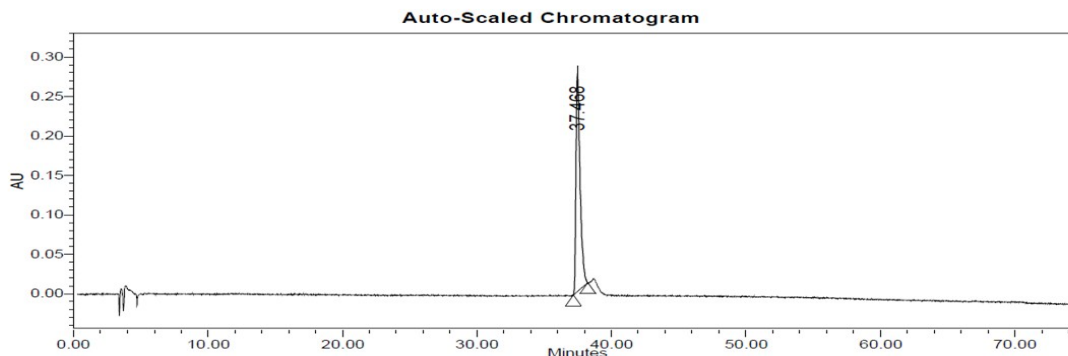

|   | RT     | Area (μV*sec) | % Area | Height (μV) |
|---|--------|---------------|--------|-------------|
| 1 | 37.468 | 5894953       | 100.00 | 275920      |

## Qualitative Compound Report

|                               |                   |                      |                       |
|-------------------------------|-------------------|----------------------|-----------------------|
| <b>Data File</b>              | 2-N3.d            | <b>Sample Name</b>   | 2-N3                  |
| <b>Sample Type</b>            | Sample            | <b>Position</b>      | Vial 24               |
| <b>Instrument Name</b>        | Instrument 1      | <b>User Name</b>     |                       |
| <b>Acq Method</b>             | vishal_12-01-13.m | <b>Acquired Time</b> | 02-03-2017 PM 2:35:46 |
| <b>IRM Calibration Status</b> | Success           | <b>DA Method</b>     | daily_report.m        |
| <b>Comment</b>                |                   |                      |                       |

|                       |                             |              |
|-----------------------|-----------------------------|--------------|
| <b>Sample Group</b>   |                             | <b>Info.</b> |
| <b>Acquisition SW</b> | 6200 series TOF/6500 series |              |
| <b>Version</b>        | Q-TOF B.05.01 (B5125)       |              |

### Compound Table

| Compound Label        | RT  | Mass     | Formula       | MFG Formula   | MFG Diff (ppm) | DB Formula    |
|-----------------------|-----|----------|---------------|---------------|----------------|---------------|
| Cpd 33: C21 H21 N3 O4 | 0.3 | 379.1528 | C21 H21 N3 O4 | C21 H21 N3 O4 | 1.16           | C21 H21 N3 O4 |

| Compound Label        | m/z      | RT  | Algorithm                 | Mass     |
|-----------------------|----------|-----|---------------------------|----------|
| Cpd 33: C21 H21 N3 O4 | 380.1598 | 0.3 | Find by Molecular Feature | 379.1528 |

### MFE MS Spectrum

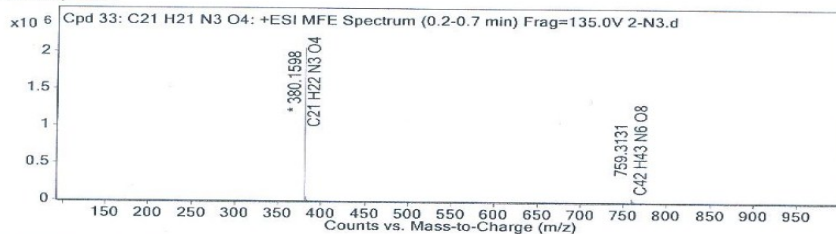

### MS Spectrum Peak List

| m/z      | z | Abund      | Formula       | Ion     |
|----------|---|------------|---------------|---------|
| 380.1598 | 1 | 2058134.38 | C21 H22 N3 O4 | (M+H)+  |
| 381.164  | 1 | 461431.16  | C21 H22 N3 O4 | (M+H)+  |
| 382.1664 | 1 | 60787.25   | C21 H22 N3 O4 | (M+H)+  |
| 759.3131 | 1 | 50214.82   | C42 H43 N6 O8 | (2M+H)+ |
| 760.3165 | 1 | 24011.39   | C42 H43 N6 O8 | (2M+H)+ |

### Predicted Isotope Match Table

| Isotope | m/z      | Calc m/z | Diff (ppm) | Abund % | Calc Abund % | Abund Sum % | Calc Abund Sum % |
|---------|----------|----------|------------|---------|--------------|-------------|------------------|
| 1       | 380.1598 | 380.1605 | 1.71       | 100     | 100          | 79.56       | 77.97            |
| 2       | 381.164  | 381.1636 | -1.12      | 22.42   | 24.21        | 17.84       | 18.88            |
| 3       | 382.1664 | 382.1662 | -0.33      | 2.95    | 3.63         | 2.35        | 2.83             |
| 4       | 383.1694 | 383.1688 | -1.42      | 0.32    | 0.41         | 0.26        | 0.32             |

# <sup>1</sup>H and <sup>13</sup>C NMR of 4:

2 N3 NMR  
2-N3

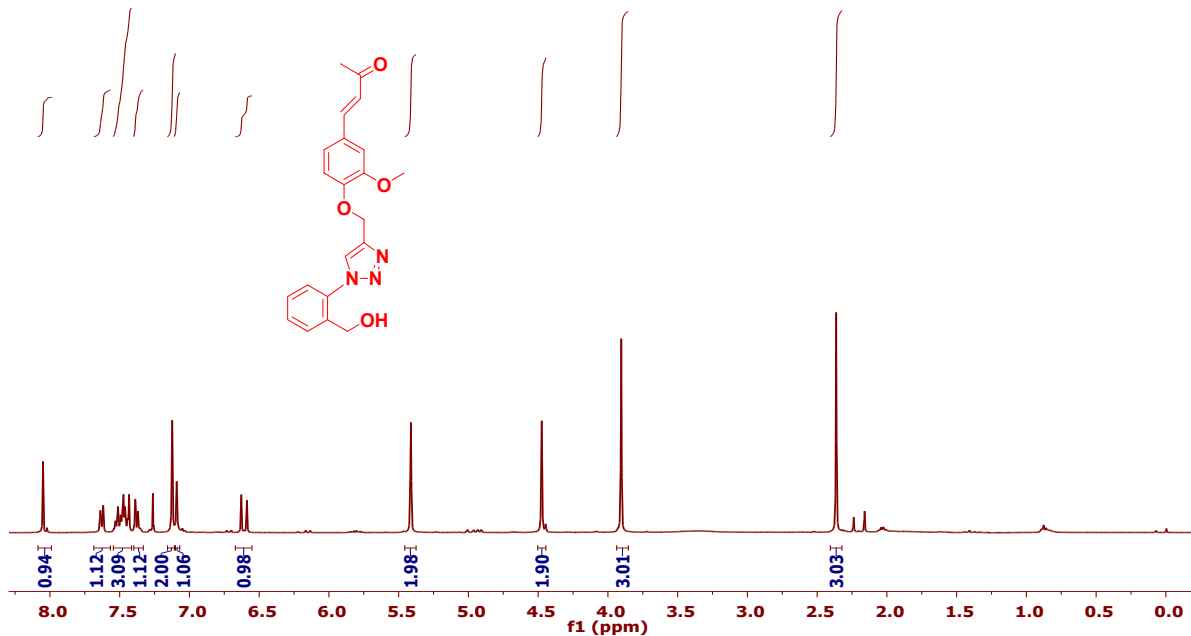

2 N 3  
2N3

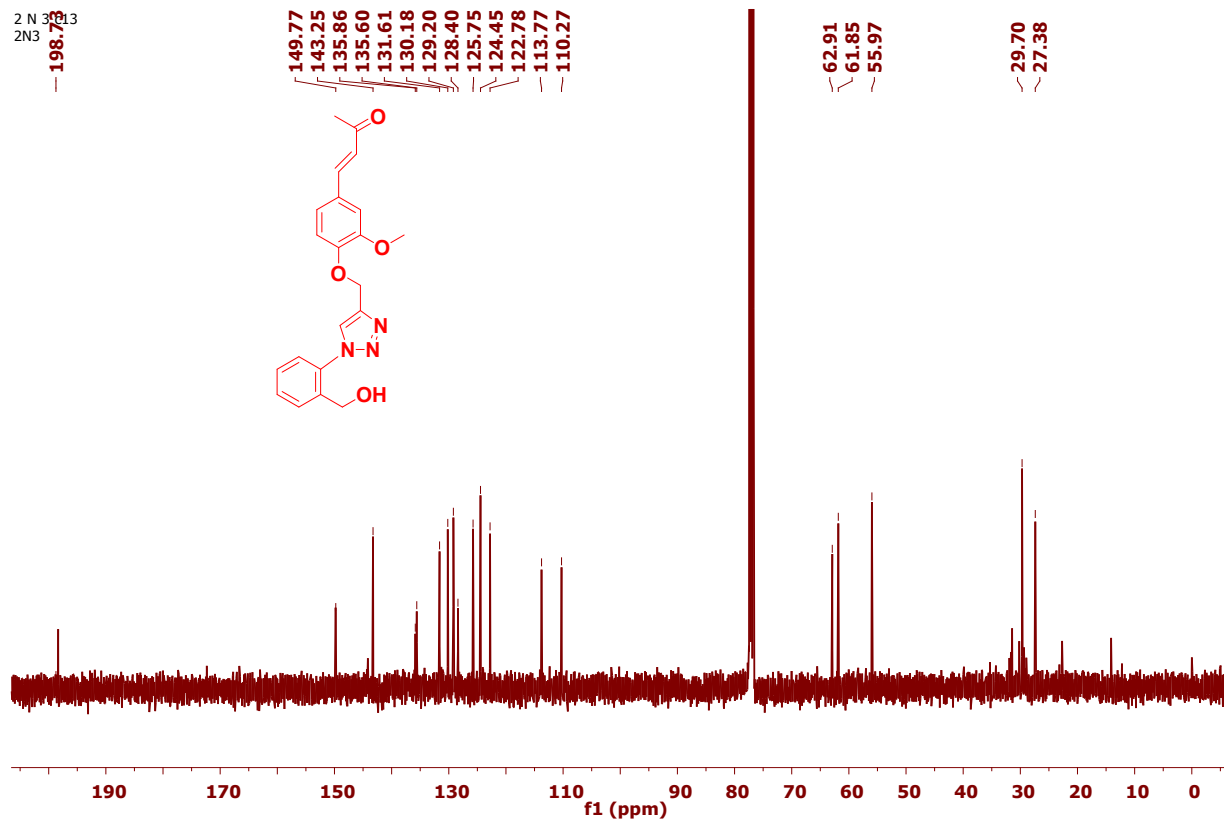

# HPLC and HRESIMS of 5

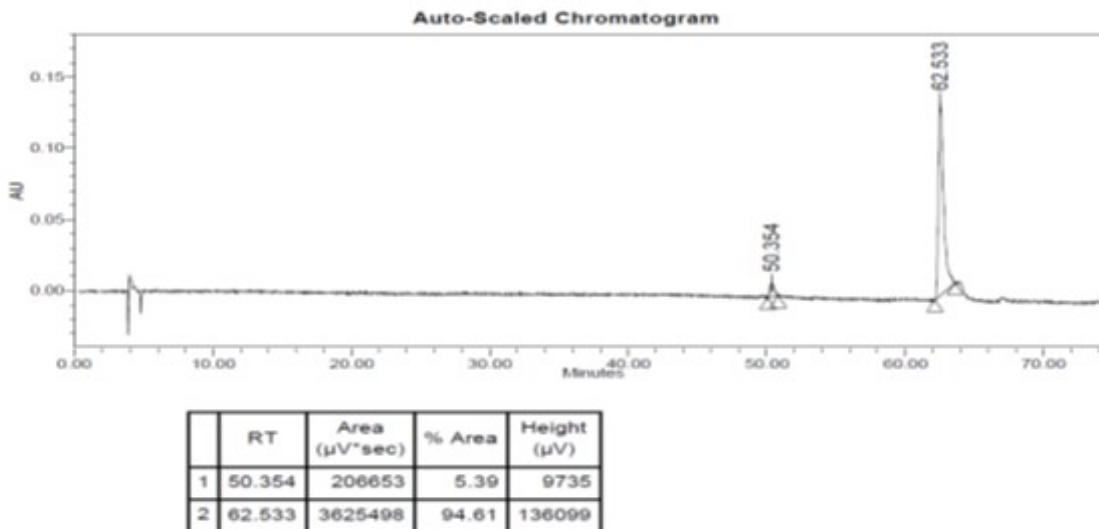

## Qualitative Compound Report

|                        |                   |               |                       |
|------------------------|-------------------|---------------|-----------------------|
| Data File              | AZOBENZENE.d      | Sample Name   | AZOBENZENE            |
| Sample Type            | Sample            | Position      | Vial 27               |
| Instrument Name        | Instrument 1      | User Name     |                       |
| Acq Method             | vishal_12-01-13.m | Acquired Time | 02-03-2017 PM 2:53:07 |
| IRM Calibration Status | Success           | DA Method     | daily_report.m        |
| Comment                |                   |               |                       |

|                |                             |       |  |
|----------------|-----------------------------|-------|--|
| Sample Group   |                             | Info. |  |
| Acquisition SW | 6200 series TOF/6500 series |       |  |
| Version        | Q-TOF B.05.01 (B5125)       |       |  |

### Compound Table

| Compound Label        | RT  | Mass     | Formula       | MFG Formula   | MFG Diff (ppm) | DB Formula    |
|-----------------------|-----|----------|---------------|---------------|----------------|---------------|
| Cpd 37: C26 H23 N5 O3 | 0.3 | 453.1806 | C26 H24 N5 O3 | C26 H23 N5 O3 | -1.11          | C26 H23 N5 O3 |

| Compound Label        | m/z      | RT  | Algorithm                 | Mass     |
|-----------------------|----------|-----|---------------------------|----------|
| Cpd 37: C26 H23 N5 O3 | 454.1879 | 0.3 | Find by Molecular Feature | 453.1806 |

### MFE MS Spectrum

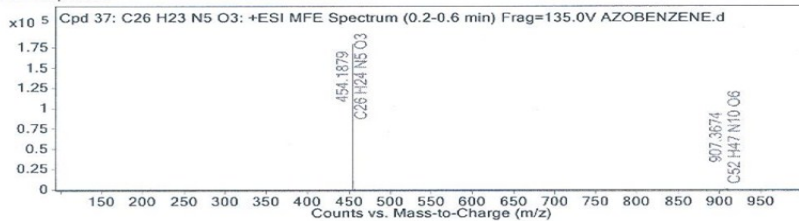

### MS Spectrum Peak List

| m/z      | z | Abund     | Formula        | Ion     |
|----------|---|-----------|----------------|---------|
| 454.1879 | 1 | 178845.95 | C26 H24 N5 O3  | (M+H)+  |
| 455.1908 | 1 | 51649.05  | C26 H24 N5 O3  | (M+H)+  |
| 456.1941 | 1 | 9802.76   | C26 H24 N5 O3  | (M+H)+  |
| 907.3674 | 1 | 2202.82   | C52 H47 N10 O6 | (2M+H)+ |
| 908.3706 | 1 | 1390.57   | C52 H47 N10 O6 | (2M+H)+ |

### Predicted Isotope Match Table

| Isotope | m/z      | Calc m/z | Diff (ppm) | Abund % | Calc Abund % | Abund Sum % | Calc Abund Sum % |
|---------|----------|----------|------------|---------|--------------|-------------|------------------|
| 1       | 454.1879 | 454.1874 | -1.09      | 100     | 100          | 74.07       | 73.53            |
| 2       | 455.1908 | 455.1904 | -0.86      | 28.88   | 30.34        | 21.39       | 22.31            |
| 3       | 456.1941 | 456.1931 | -2.1       | 5.48    | 5.06         | 4.06        | 3.72             |
| 4       | 457.1989 | 457.1958 | -6.68      | 0.65    | 0.61         | 0.48        | 0.45             |

# <sup>1</sup>H and <sup>13</sup>C NMR of 5:

AZO BENZENE NMR  
AZO BENZENE

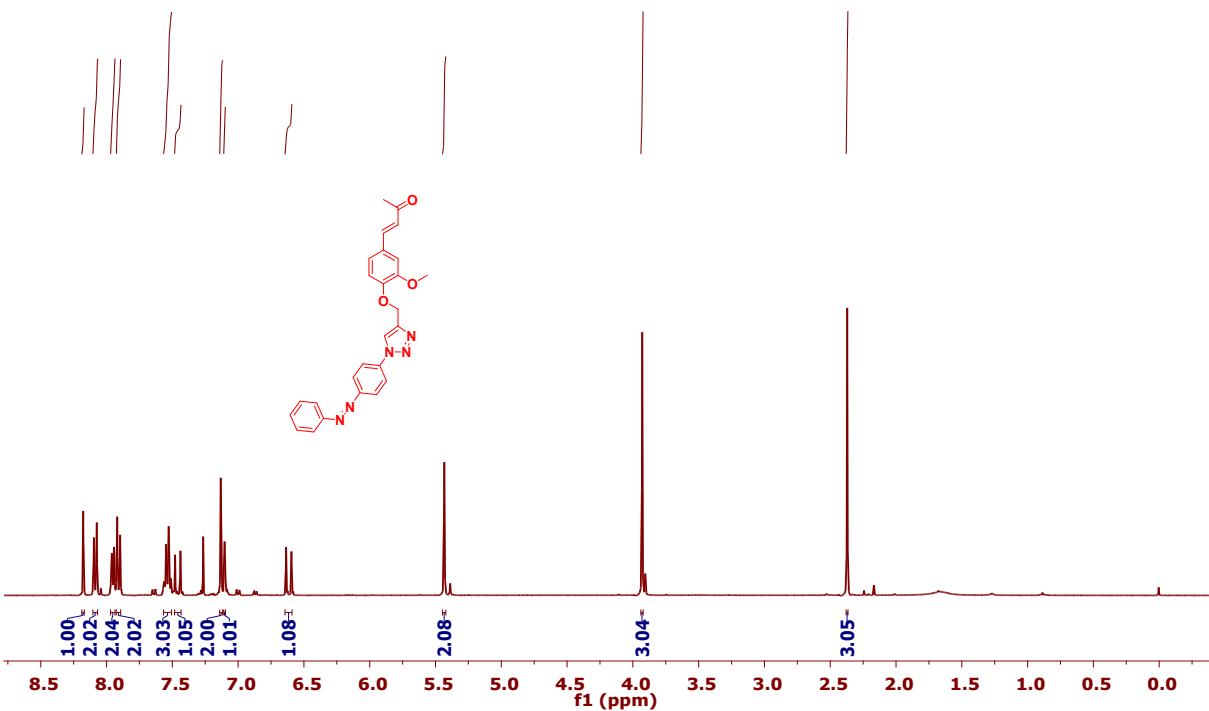

AZO BENZENE c13  
Azobenzene

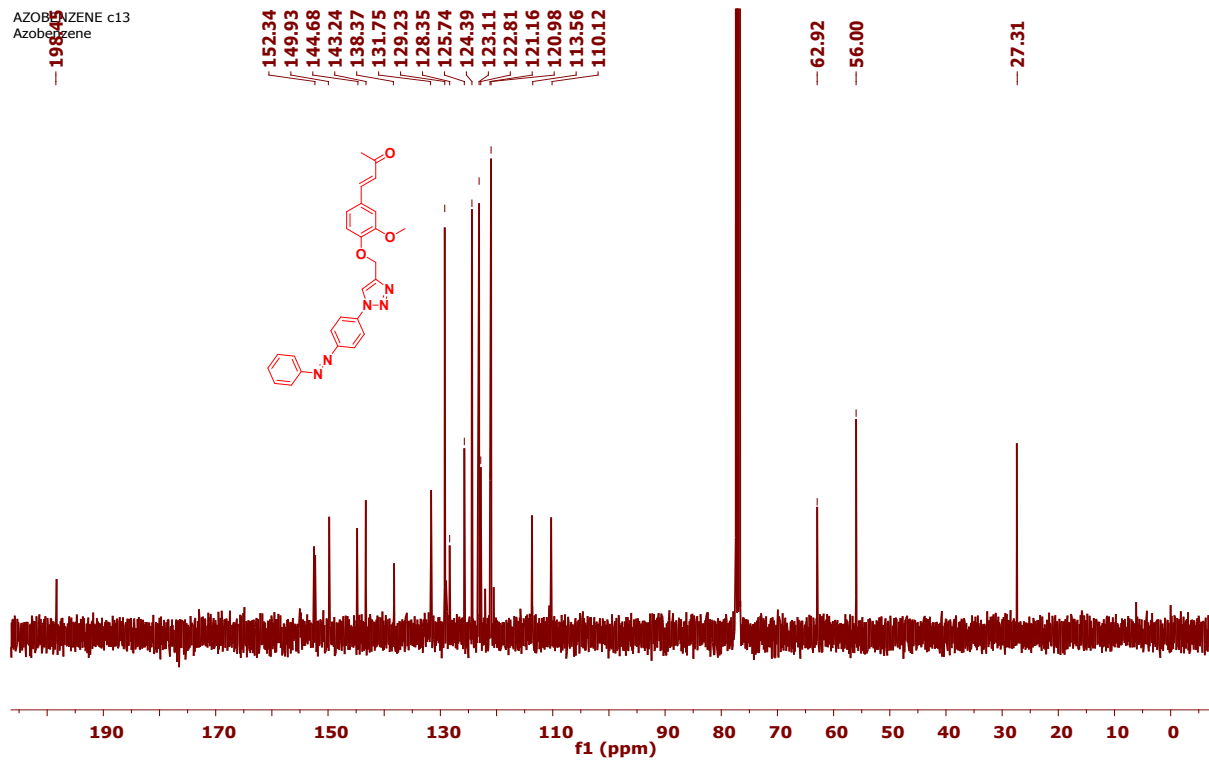

# HPLC AND HRESIMS of 6:

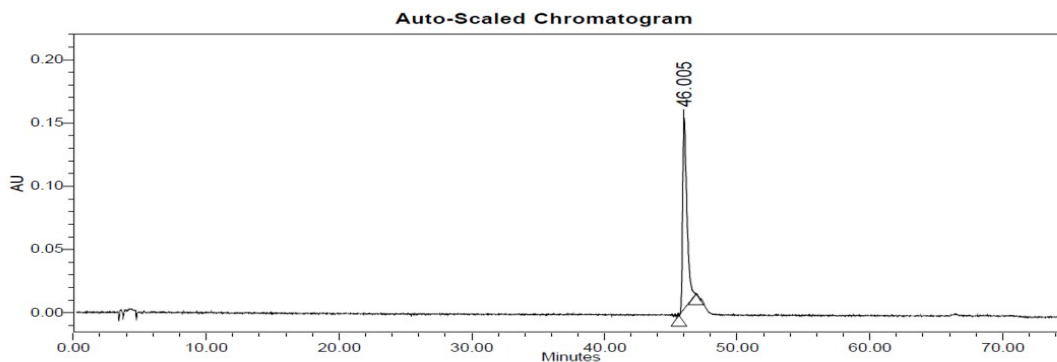

|   | RT     | Area (μV*sec) | % Area | Height (μV) |
|---|--------|---------------|--------|-------------|
| 1 | 46.005 | 3414763       | 100.00 | 151068      |

## Qualitative Compound Report

|                               |                   |                      |                       |
|-------------------------------|-------------------|----------------------|-----------------------|
| <b>Data File</b>              | 4-OMe-N3.d        | <b>Sample Name</b>   | 4-OMe-N3              |
| <b>Sample Type</b>            | Sample            | <b>Position</b>      | Vial 19               |
| <b>Instrument Name</b>        | Instrument 1      | <b>User Name</b>     |                       |
| <b>Acq Method</b>             | vishal_12-01-13.m | <b>Acquired Time</b> | 02-03-2017 PM 2:09:43 |
| <b>IRM Calibration Status</b> | Success           | <b>DA Method</b>     | daily_report.m        |
| <b>Comment</b>                |                   |                      |                       |

|                       |                             |              |
|-----------------------|-----------------------------|--------------|
| <b>Sample Group</b>   |                             | <b>Info.</b> |
| <b>Acquisition SW</b> | 6200 series TOF/6500 series |              |
| <b>Version</b>        | Q-TOF B.05.01 (B5125)       |              |

### Compound Table

| Compound Label        | RT  | Mass     | Formula       | MFG Formula   | MFG Diff (ppm) | DB Formula    |
|-----------------------|-----|----------|---------------|---------------|----------------|---------------|
| Cpd 38: C21 H21 N3 O4 | 0.3 | 379.1529 | C21 H21 N3 O4 | C21 H21 N3 O4 | 0.81           | C21 H21 N3 O4 |

| Compound Label        | m/z      | RT  | Algorithm                 | Mass     |
|-----------------------|----------|-----|---------------------------|----------|
| Cpd 38: C21 H21 N3 O4 | 380.1599 | 0.3 | Find by Molecular Feature | 379.1529 |

### MFE MS Spectrum

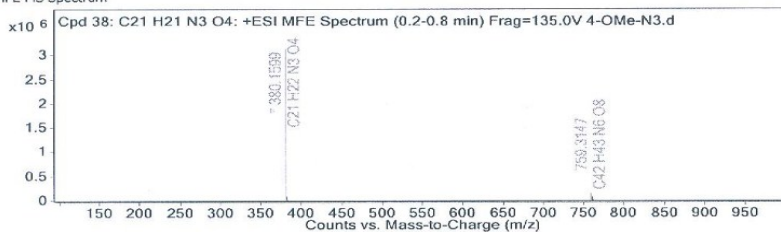

### MS Spectrum Peak List

| m/z      | z | Abund      | Formula       | Ion     |
|----------|---|------------|---------------|---------|
| 380.1599 | 1 | 3128396.25 | C21 H22 N3 O4 | (M+H)+  |
| 381.1645 | 1 | 686203     | C21 H22 N3 O4 | (M+H)+  |
| 382.1669 | 1 | 93718.7    | C21 H22 N3 O4 | (M+H)+  |
| 759.3147 | 1 | 145659.97  | C42 H43 N6 O8 | (2M+H)+ |
| 760.3178 | 1 | 67842.76   | C42 H43 N6 O8 | (2M+H)+ |

### Predicted Isotope Match Table

| Isotope | m/z      | Calc m/z | Diff (ppm) | Abund % | Calc Abund % | Abund Sum % | Calc Abund Sum % |
|---------|----------|----------|------------|---------|--------------|-------------|------------------|
| 1       | 380.1599 | 380.1605 | 1.57       | 100     | 100          | 79.86       | 77.97            |
| 2       | 381.1645 | 381.1636 | -2.33      | 21.93   | 24.21        | 17.52       | 18.88            |
| 3       | 382.1669 | 382.1662 | -1.66      | 3       | 3.63         | 2.39        | 2.83             |
| 4       | 383.1693 | 383.1688 | -1.36      | 0.28    | 0.41         | 0.23        | 0.32             |

# <sup>1</sup>H and <sup>13</sup>C NMR of 6:

4-OMe N3 NMR  
4-OMEN3

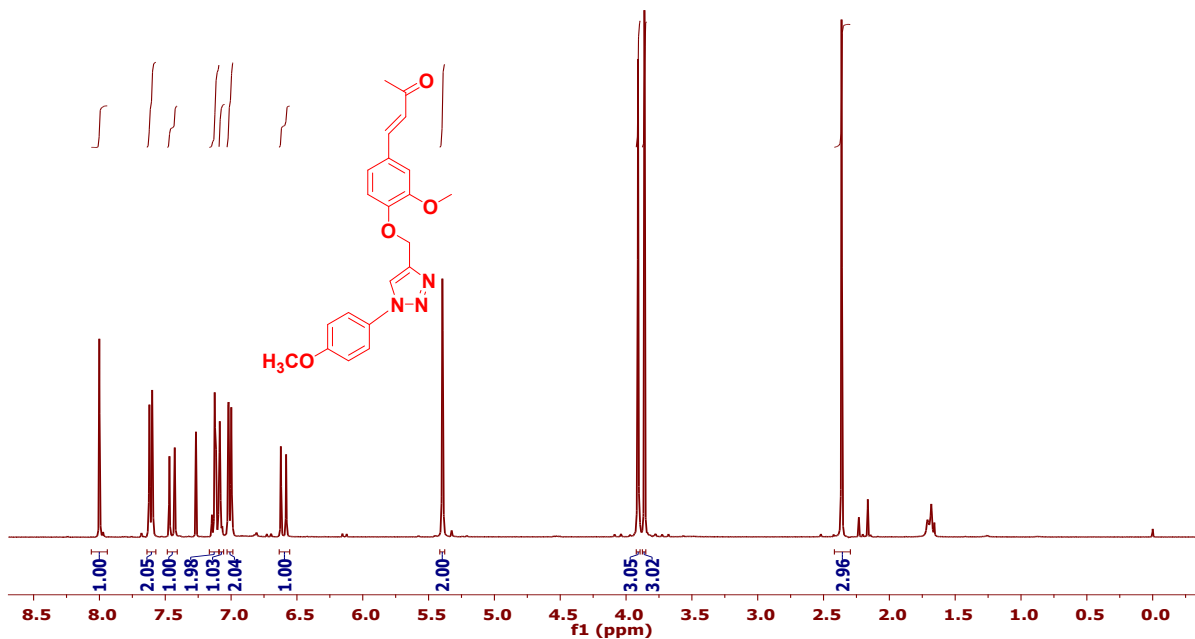

4-OMe N3  
1-2-17

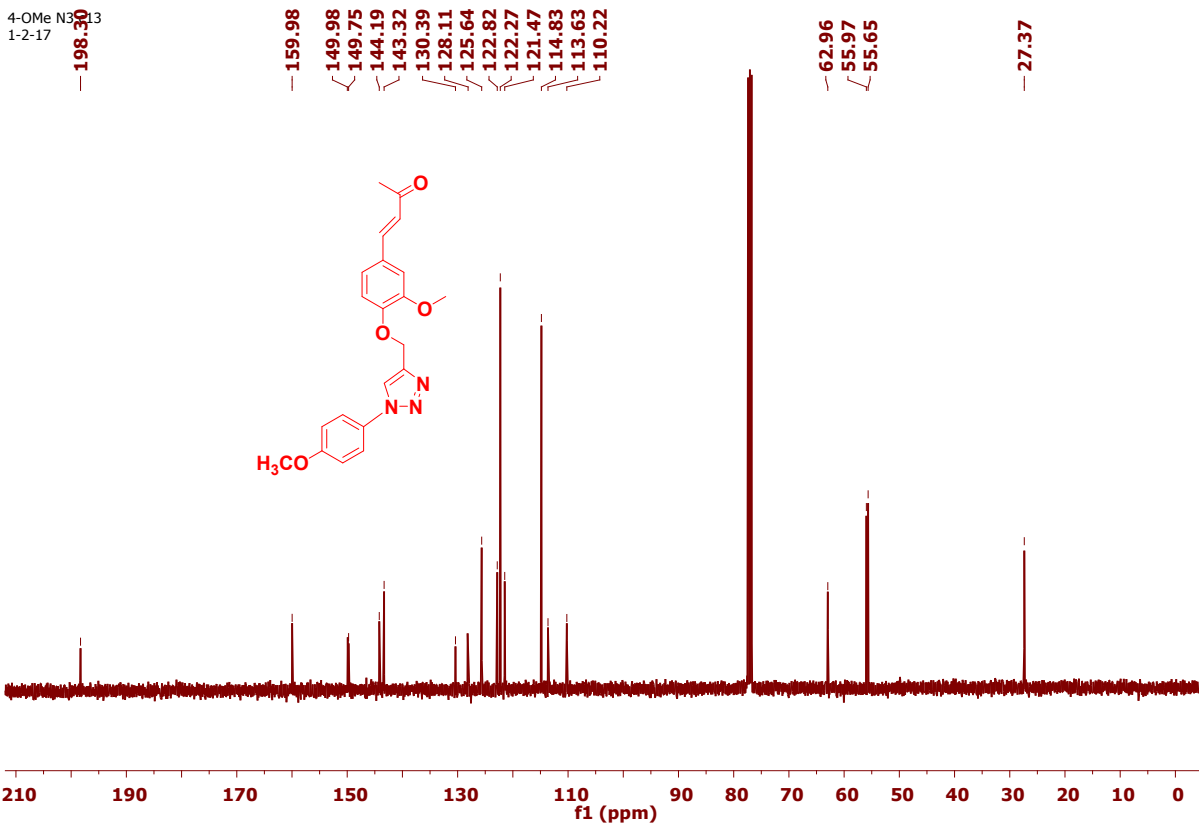



# HPLC AND HRESIMS of 7:

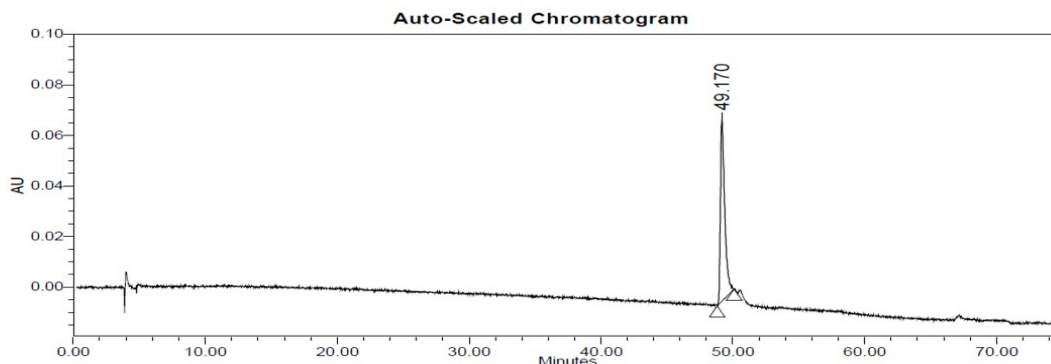

|   | RT     | Area (μV*sec) | % Area | Height (μV) |
|---|--------|---------------|--------|-------------|
| 1 | 49.170 | 1648682       | 100.00 | 71347       |

## Qualitative Compound Report

**Data File** 2,6-DiCl.d **Sample Name** 2,6-DiCl  
**Sample Type** Sample **Position** Vial 26  
**Instrument Name** Instrument 1 **User Name**  
**Acq Method** vishal\_12-01-13.m **Acquired Time** 02-03-2017 PM 2:44:22  
**IRM Calibration Status** Success **DA Method** daily\_report.m  
**Comment**

**Sample Group** **Info.**  
**Acquisition SW** 6200 series TOF/6500 series  
**Version** Q-TOF B.05.01 (B5125)

### Compound Table

| Compound Label            | RT  | Mass     | Formula           | MFG Formula       | MFG Diff (ppm) | DB Formula        |
|---------------------------|-----|----------|-------------------|-------------------|----------------|-------------------|
| Cpd 53: C20 H17 Cl2 N3 O3 | 0.4 | 417.0654 | C20 H17 Cl2 N3 O3 | C20 H17 Cl2 N3 O3 | -1.76          | C20 H17 Cl2 N3 O3 |

| Compound Label            | m/z      | RT  | Algorithm                 | Mass     |
|---------------------------|----------|-----|---------------------------|----------|
| Cpd 53: C20 H17 Cl2 N3 O3 | 418.0727 | 0.4 | Find by Molecular Feature | 417.0654 |

### MFE MS Spectrum

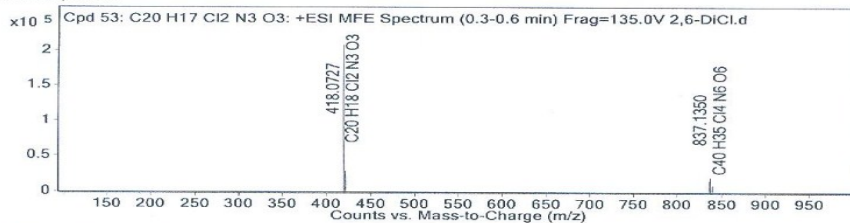

### MS Spectrum Peak List

| m/z      | z | Abund     | Formula           | Ion    |
|----------|---|-----------|-------------------|--------|
| 418.0727 | 1 | 208120.92 | C20 H18 Cl2 N3 O3 | (M+H)+ |
| 419.076  | 1 | 45114.04  | C20 H18 Cl2 N3 O3 | (M+H)+ |
| 420.0701 | 1 | 124211.38 | C20 H18 Cl2 N3 O3 | (M+H)+ |
| 421.0731 | 1 | 29334.54  | C20 H18 Cl2 N3 O3 | (M+H)+ |
| 422.068  | 1 | 22162.6   | C20 H18 Cl2 N3 O3 | (M+H)+ |

### Predicted Isotope Match Table

| Isotope | m/z      | Calc m/z | Diff (ppm) | Abund % | Calc Abund % | Abund Sum % | Calc Abund Sum % |
|---------|----------|----------|------------|---------|--------------|-------------|------------------|
| 1       | 418.0727 | 418.072  | -1.77      | 100     | 100          | 48.52       | 45.97            |
| 2       | 419.076  | 419.0751 | -2.28      | 21.68   | 23.05        | 10.52       | 10.59            |
| 3       | 420.0701 | 420.0694 | -1.59      | 59.68   | 67.15        | 28.96       | 30.87            |
| 4       | 421.0731 | 421.0723 | -1.93      | 14.09   | 15.07        | 6.84        | 6.93             |
| 5       | 422.068  | 422.0675 | -1.11      | 10.65   | 12.28        | 5.17        | 5.65             |

--- End Of Report ---



# <sup>1</sup>H and <sup>13</sup>C NMR of 7:

2,6-Di Cl N3 NMR  
2,6-DiCl-N3

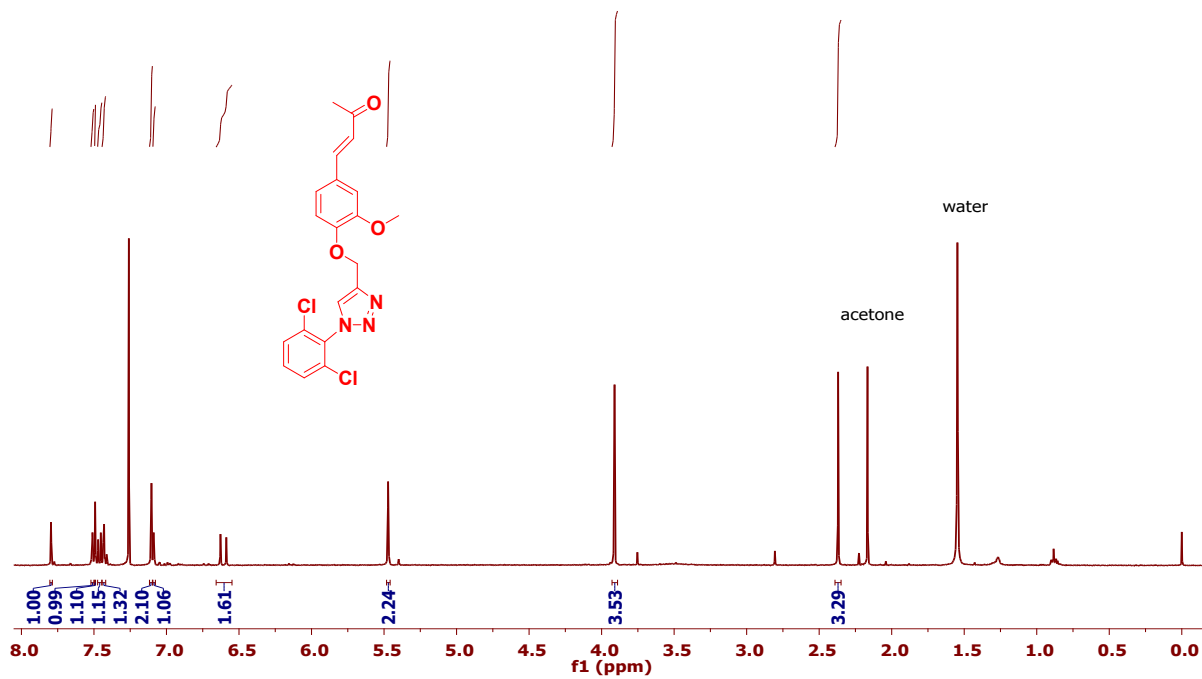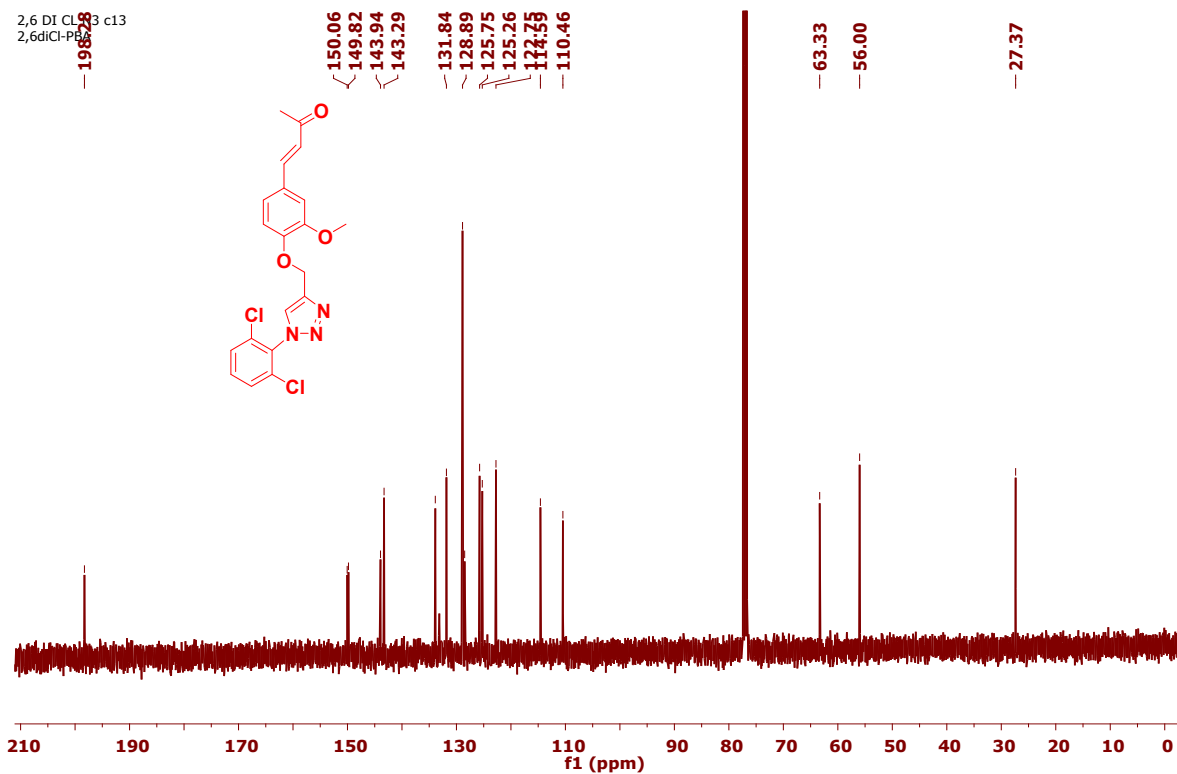

# HPLC AND HRESIMS of 8-

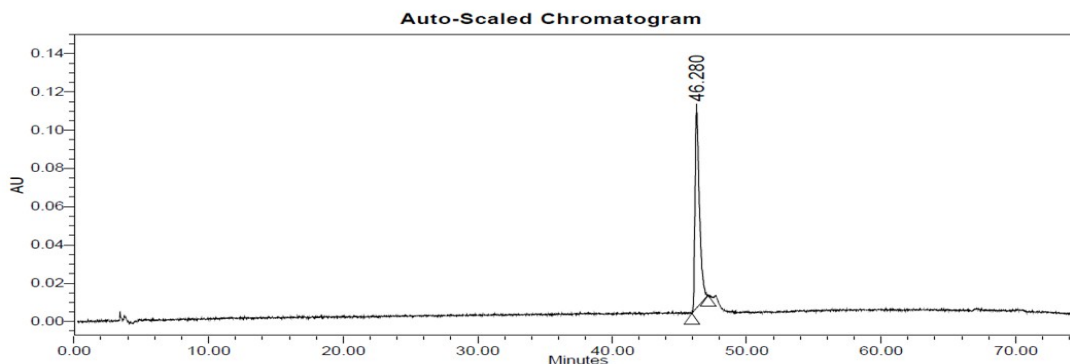

|   | RT     | Area (μV*sec) | % Area | Height (μV) |
|---|--------|---------------|--------|-------------|
| 1 | 46.280 | 2356079       | 100.00 | 102622      |

## Qualitative Compound Report

|                               |                   |                      |                       |
|-------------------------------|-------------------|----------------------|-----------------------|
| <b>Data File</b>              | O-ANISIDINE.d     | <b>Sample Name</b>   | O-ANISIDINE           |
| <b>Sample Type</b>            | Sample            | <b>Position</b>      | Vial 20               |
| <b>Instrument Name</b>        | Instrument 1      | <b>User Name</b>     |                       |
| <b>Acq Method</b>             | vishal_12-01-13.m | <b>Acquired Time</b> | 02-03-2017 PM 2;14:04 |
| <b>IRM Calibration Status</b> | Success           | <b>DA Method</b>     | daily_report.m        |
| <b>Comment</b>                |                   |                      |                       |

**Sample Group** Info.  
**Acquisition SW** 6200 series TOF/6500 series  
**Version** Q-TOF B.05.01 (B5125)

### Compound Table

| Compound Label        | RT  | Mass     | Formula       | MFG Formula   | MFG Diff (ppm) | DB Formula    |
|-----------------------|-----|----------|---------------|---------------|----------------|---------------|
| Cpd 31: C21 H21 N3 O4 | 0.3 | 379.1528 | C21 H21 N3 O4 | C21 H21 N3 O4 | 1.18           | C21 H21 N3 O4 |

| Compound Label        | m/z      | RT  | Algorithm                 | Mass     |
|-----------------------|----------|-----|---------------------------|----------|
| Cpd 31: C21 H21 N3 O4 | 380.1602 | 0.3 | Find by Molecular Feature | 379.1528 |

### MFE MS Spectrum

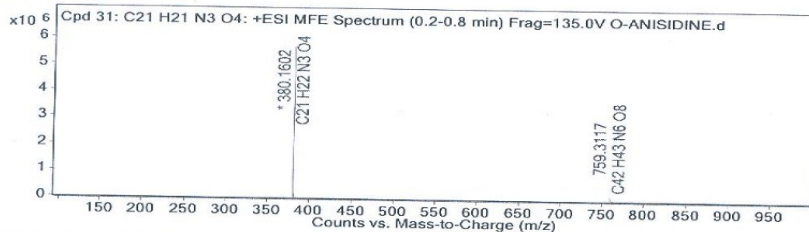

### MS Spectrum Peak List

| m/z      | z | Abund      | Formula       | Ion     |
|----------|---|------------|---------------|---------|
| 380.1602 | 1 | 5667660.5  | C21 H22 N3 O4 | (M+H)+  |
| 381.1624 | 1 | 1246876.25 | C21 H22 N3 O4 | (M+H)+  |
| 382.1655 | 1 | 167291.45  | C21 H22 N3 O4 | (M+H)+  |
| 759.3117 | 1 | 166346.47  | C42 H43 N6 O8 | (2M+H)+ |
| 760.3145 | 1 | 80817.66   | C42 H43 N6 O8 | (2M+H)+ |

### Predicted Isotope Match Table

| Isotope | m/z      | Calc m/z | Diff (ppm) | Abund % | Calc Abund % | Abund Sum % | Calc Abund Sum % |
|---------|----------|----------|------------|---------|--------------|-------------|------------------|
| 1       | 380.1602 | 380.1605 | 0.7        | 100     | 100          | 79.77       | 77.95            |
| 2       | 381.1624 | 381.1636 | 3.16       | 22      | 24.21        | 17.55       | 18.88            |
| 3       | 382.1655 | 382.1662 | 1.98       | 2.95    | 3.63         | 2.35        | 2.83             |
| 4       | 383.1674 | 383.1688 | 3.81       | 0.36    | 0.41         | 0.29        | 0.32             |
| 5       | 384.1692 | 384.1714 | 5.66       | 0.04    | 0.04         | 0.03        | 0.03             |

--- End Of Report ---

# <sup>1</sup>H and <sup>13</sup>C NMR of 8:

O-Anisidine NMR  
O-ANISIDINE

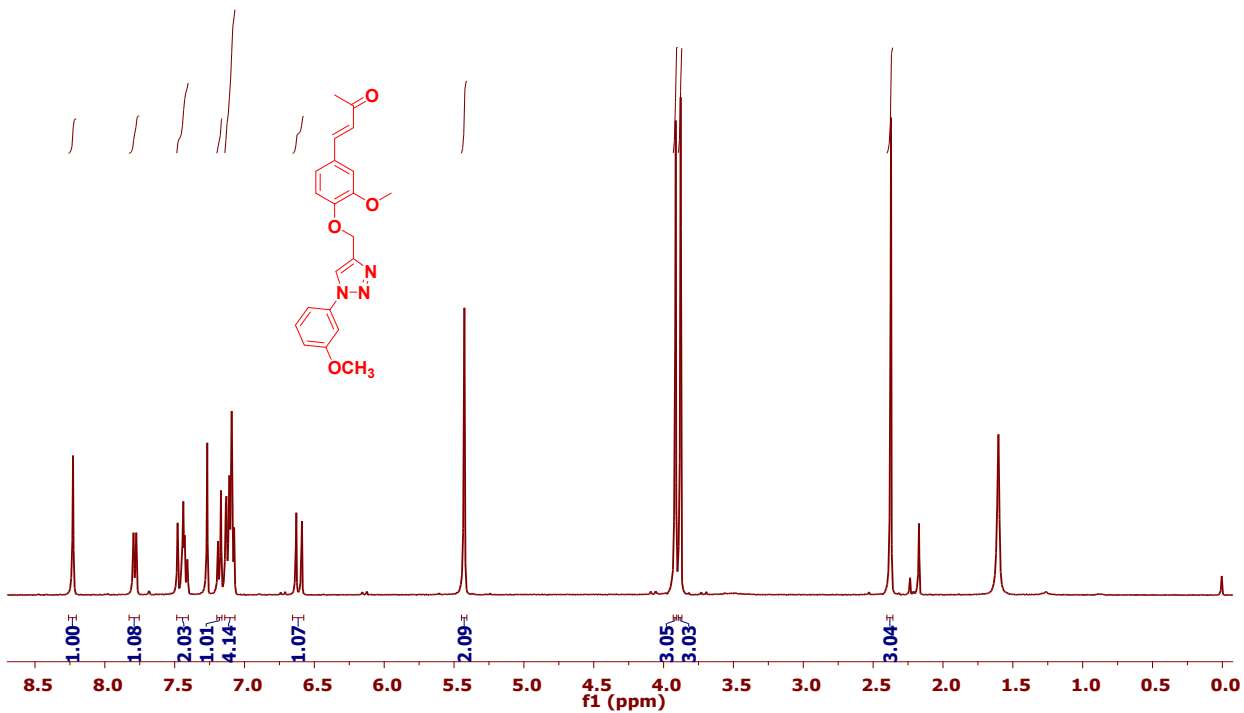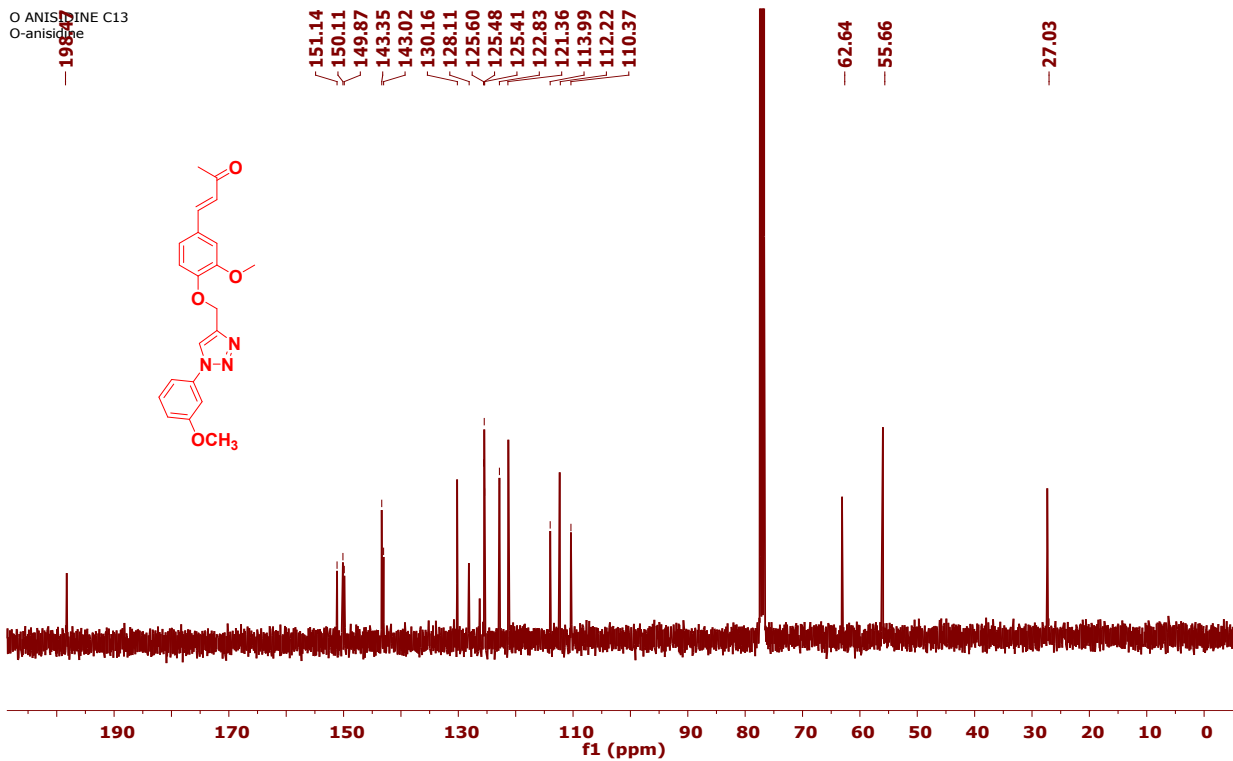

# HPLC AND HRESIMS of 9:

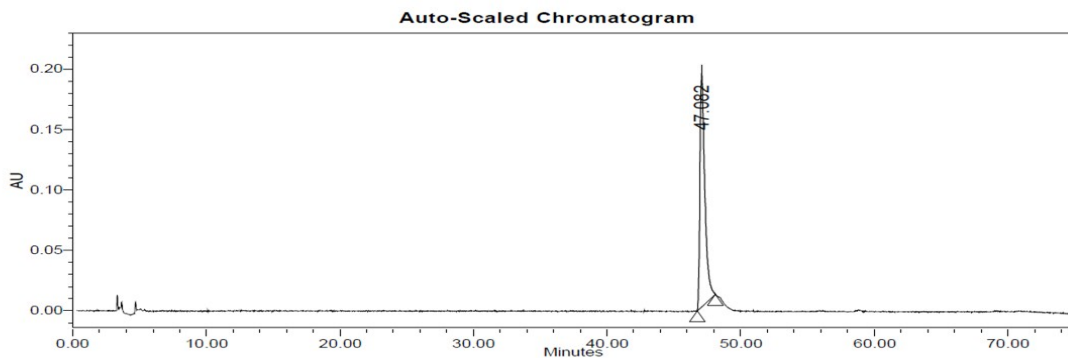

|   | RT     | Area<br>( $\mu\text{V}\cdot\text{sec}$ ) | % Area | Height<br>( $\mu\text{V}$ ) |
|---|--------|------------------------------------------|--------|-----------------------------|
| 1 | 47.082 | 4811458                                  | 100.00 | 193723                      |

## Qualitative Compound Report

|                               |                   |                      |                        |
|-------------------------------|-------------------|----------------------|------------------------|
| <b>Data File</b>              | m-anisidine.d     | <b>Sample Name</b>   | m-anisidine            |
| <b>Sample Type</b>            | Sample            | <b>Position</b>      | Vial 2                 |
| <b>Instrument Name</b>        | Instrument 1      | <b>User Name</b>     |                        |
| <b>Acq Method</b>             | vishal_12-01-13.m | <b>Acquired Time</b> | 09-03-2017 PM 12:46:55 |
| <b>IRM Calibration Status</b> | Success           | <b>DA Method</b>     | daily_report.m         |
| <b>Comment</b>                |                   |                      |                        |

|                       |                             |              |
|-----------------------|-----------------------------|--------------|
| <b>Sample Group</b>   |                             | <b>Info.</b> |
| <b>Acquisition SW</b> | 6200 series TOF/6500 series |              |
| <b>Version</b>        | Q-TOF B.05.01 (B5125)       |              |

### Compound Table

| Compound Label        | RT  | Mass     | Formula       | MFG Formula   | MFG Diff (ppm) | DB Formula    |
|-----------------------|-----|----------|---------------|---------------|----------------|---------------|
| Cpd 24: C21 H21 N3 O4 | 0.3 | 379.1527 | C21 H21 N3 O4 | C21 H21 N3 O4 | 1.27           | C21 H21 N3 O4 |

| Compound Label        | m/z      | RT  | Algorithm                 | Mass     |
|-----------------------|----------|-----|---------------------------|----------|
| Cpd 24: C21 H21 N3 O4 | 380.1599 | 0.3 | Find by Molecular Feature | 379.1527 |

### MFE MS Spectrum

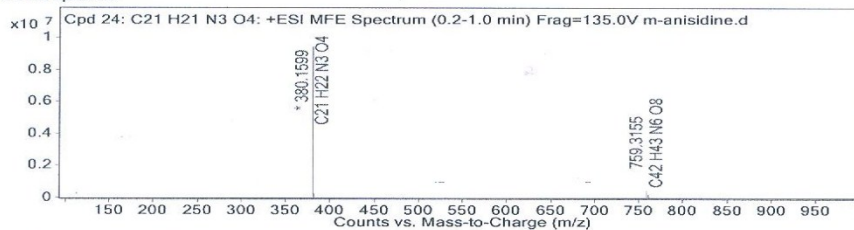

### MS Spectrum Peak List

| m/z      | z | Abund      | Formula       | Ion     |
|----------|---|------------|---------------|---------|
| 380.1599 | 1 | 9418078    | C21 H22 N3 O4 | (M+H)+  |
| 381.1635 | 1 | 2033427.38 | C21 H22 N3 O4 | (M+H)+  |
| 382.1663 | 1 | 262618.13  | C21 H22 N3 O4 | (M+H)+  |
| 759.3155 | 1 | 435239.63  | C42 H43 N6 O8 | (2M+H)+ |
| 760.3182 | 1 | 201223.38  | C42 H43 N6 O8 | (2M+H)+ |

### Predicted Isotope Match Table

| Isotope | m/z      | Calc m/z | Diff (ppm) | Abund % | Calc Abund % | Abund Sum % | Calc Abund Sum % |
|---------|----------|----------|------------|---------|--------------|-------------|------------------|
| 1       | 380.1599 | 380.1605 | 1.53       | 100     | 100          | 80.21       | 77.95            |
| 2       | 381.1635 | 381.1636 | 0.22       | 21.59   | 24.21        | 17.32       | 18.88            |
| 3       | 382.1663 | 382.1662 | -0.07      | 2.79    | 3.63         | 2.24        | 2.83             |
| 4       | 383.1684 | 383.1688 | 0.97       | 0.26    | 0.41         | 0.21        | 0.32             |
| 5       | 384.1706 | 384.1714 | 1.93       | 0.03    | 0.04         | 0.03        | 0.03             |

# <sup>1</sup>H and <sup>13</sup>C NMR of 9:

m-anisidine NMR  
M-ARISIDINE

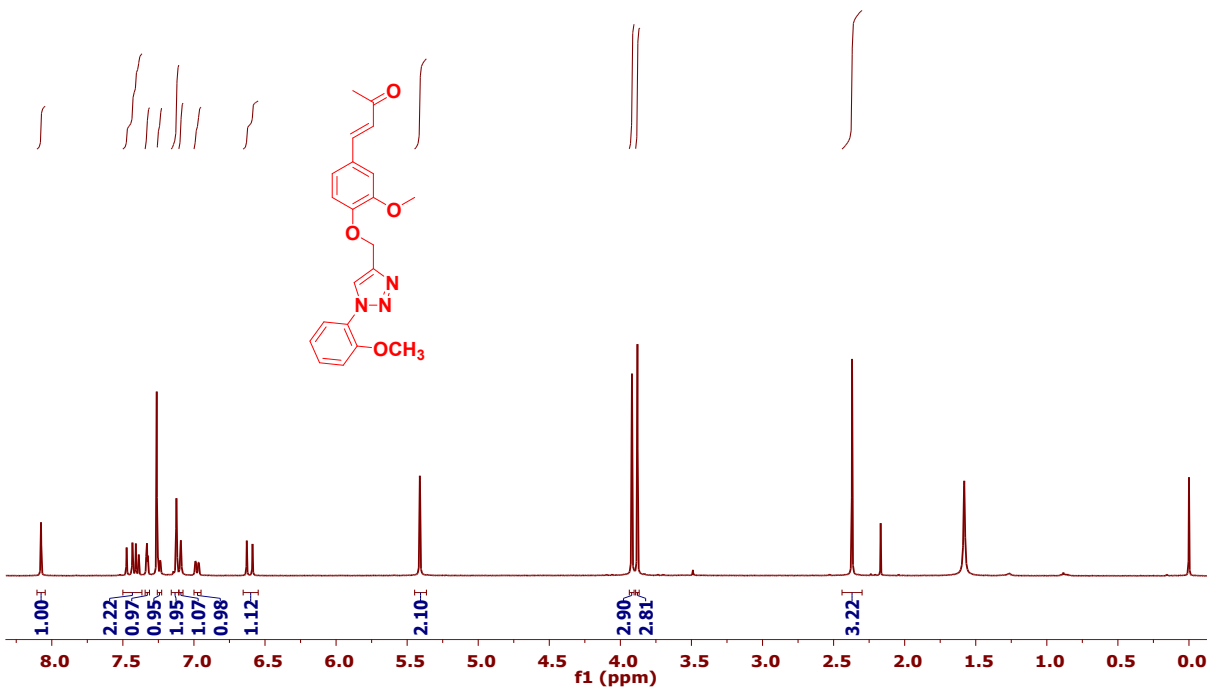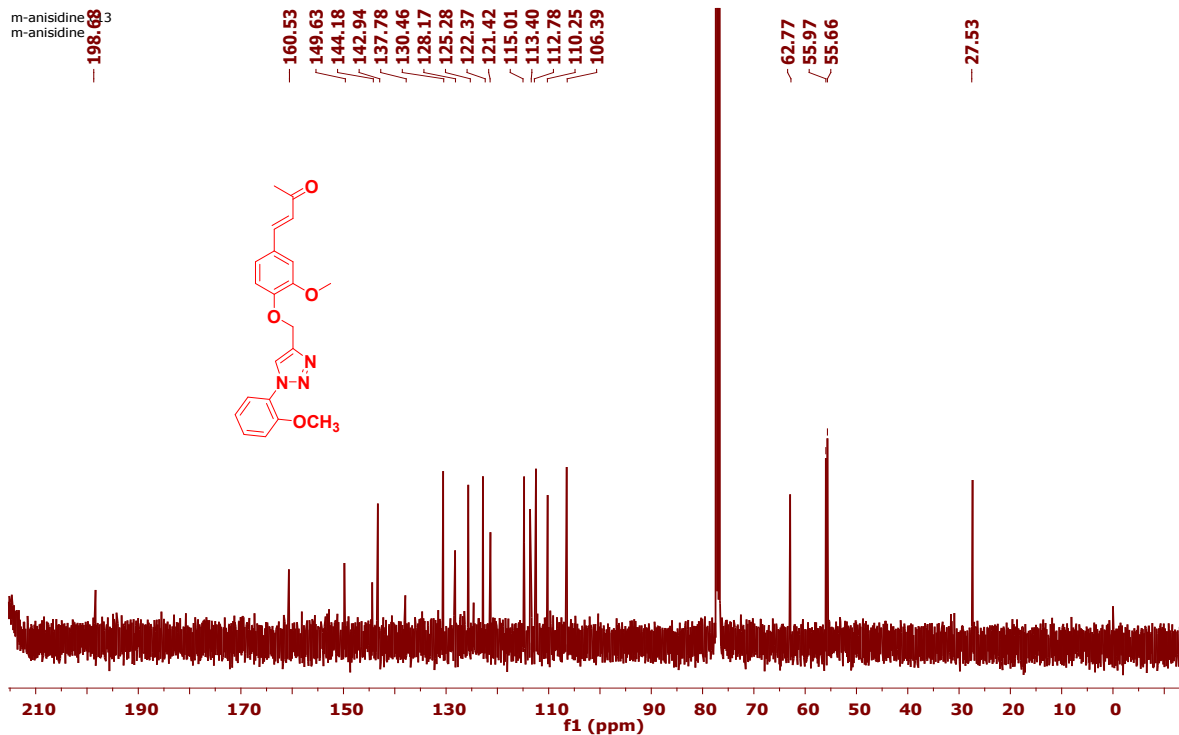

# HPLC AND HRESIMS of 10

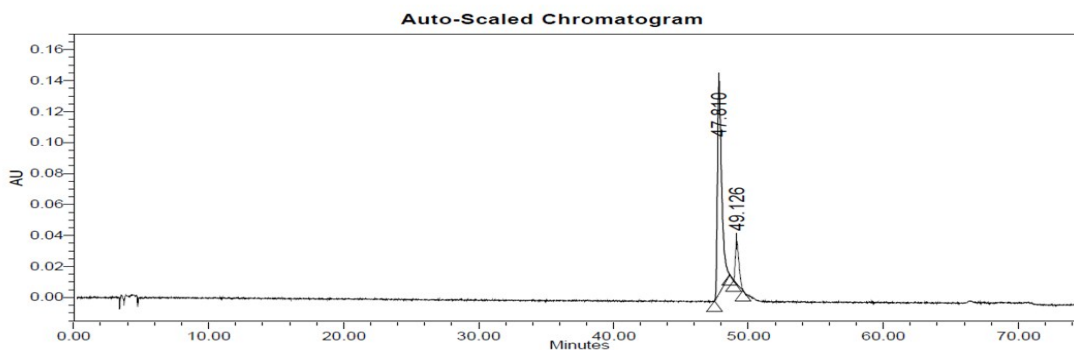

|   | RT     | Area (μV*sec) | % Area | Height (μV) |
|---|--------|---------------|--------|-------------|
| 1 | 47.810 | 2994221       | 85.24  | 137808      |
| 2 | 49.126 | 518514        | 14.76  | 27725       |

## Qualitative Compound Report

|                               |                   |                      |                       |
|-------------------------------|-------------------|----------------------|-----------------------|
| <b>Data File</b>              | 4-ABN.d           | <b>Sample Name</b>   | 4-ABN                 |
| <b>Sample Type</b>            | Sample            | <b>Position</b>      | Vial 25               |
| <b>Instrument Name</b>        | Instrument 1      | <b>User Name</b>     |                       |
| <b>Acq Method</b>             | vishal_12-01-13.m | <b>Acquired Time</b> | 02-03-2017 PM 2:40:03 |
| <b>IRM Calibration Status</b> | Success           | <b>DA Method</b>     | daily_report.m        |
| <b>Comment</b>                |                   |                      |                       |

**Sample Group** Info.  
**Acquisition SW** 6200 series TOF/6500 series  
**Version** Q-TOF B.05.01 (B5125)

### Compound Table

| Compound Label        | RT  | Mass     | Formula       | MFG Formula   | MFG Diff (ppm) | DB Formula    |
|-----------------------|-----|----------|---------------|---------------|----------------|---------------|
| Cpd 52: C27 H24 N4 O4 | 0.3 | 468.1804 | C27 H24 N4 O4 | C27 H24 N4 O4 | -1.36          | C27 H24 N4 O4 |

| Compound Label        | m/z      | RT  | Algorithm                 | Mass     |
|-----------------------|----------|-----|---------------------------|----------|
| Cpd 52: C27 H24 N4 O4 | 469.1874 | 0.3 | Find by Molecular Feature | 468.1804 |

### MFE MS Spectrum

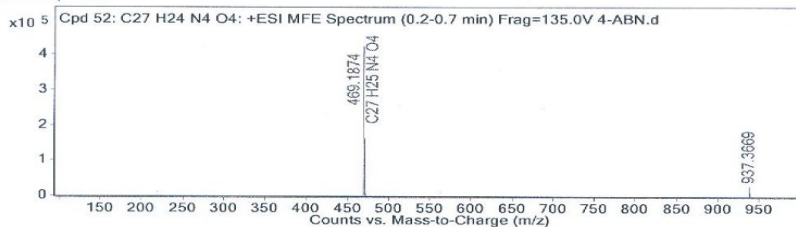

### MS Spectrum Peak List

| m/z      | z | Abund     | Formula       | Ion                 |
|----------|---|-----------|---------------|---------------------|
| 469.1874 | 1 | 423718.28 | C27 H25 N4 O4 | (M+H) <sup>+</sup>  |
| 470.191  | 1 | 162967.69 | C27 H25 N4 O4 | (M+H) <sup>+</sup>  |
| 471.1945 | 1 | 34089.97  | C27 H25 N4 O4 | (M+H) <sup>+</sup>  |
| 937.3669 | 1 | 29577.66  |               | (2M+H) <sup>+</sup> |
| 938.3707 | 1 | 25261.61  |               | (2M+H) <sup>+</sup> |

### Predicted Isotope Match Table

| Isotope | m/z      | Calc m/z | Diff (ppm) | Abund % | Calc Abund % | Abund Sum % | Calc Abund Sum % |
|---------|----------|----------|------------|---------|--------------|-------------|------------------|
| 1       | 469.1874 | 469.187  | -0.88      | 100     | 100          | 67.41       | 72.79            |
| 2       | 470.191  | 470.1901 | -1.93      | 38.46   | 31.1         | 25.93       | 22.64            |
| 3       | 471.1945 | 471.1929 | -3.38      | 8.05    | 5.5          | 5.42        | 4                |
| 4       | 472.199  | 472.1956 | -7.26      | 1.45    | 0.71         | 0.98        | 0.52             |
| 5       | 473.1988 | 473.1982 | -1.36      | 0.34    | 0.07         | 0.23        | 0.05             |
| 6       | 474.2112 | 474.2008 | -21.9      | 0.04    | 0.01         | 0.03        | 0                |

# <sup>1</sup>H and <sup>13</sup>C NMR of 10:

11-feb-npc-p2  
4-AZIDO-BENZAHLIDE

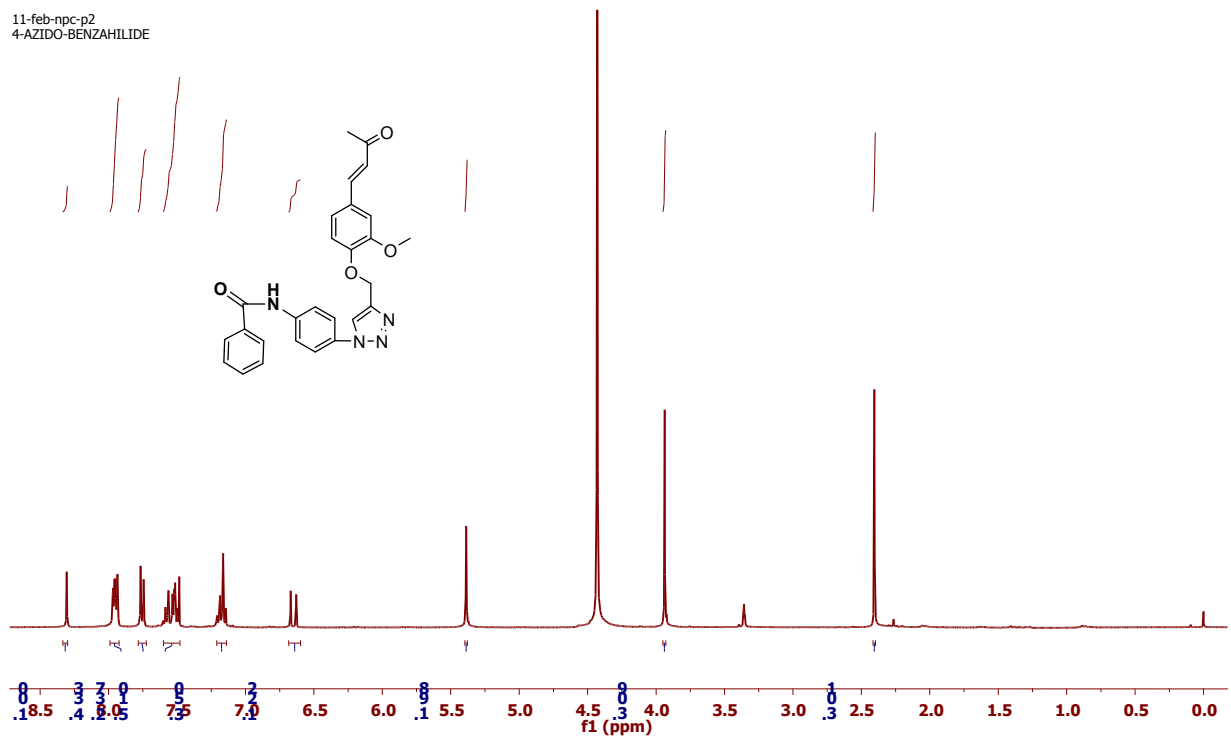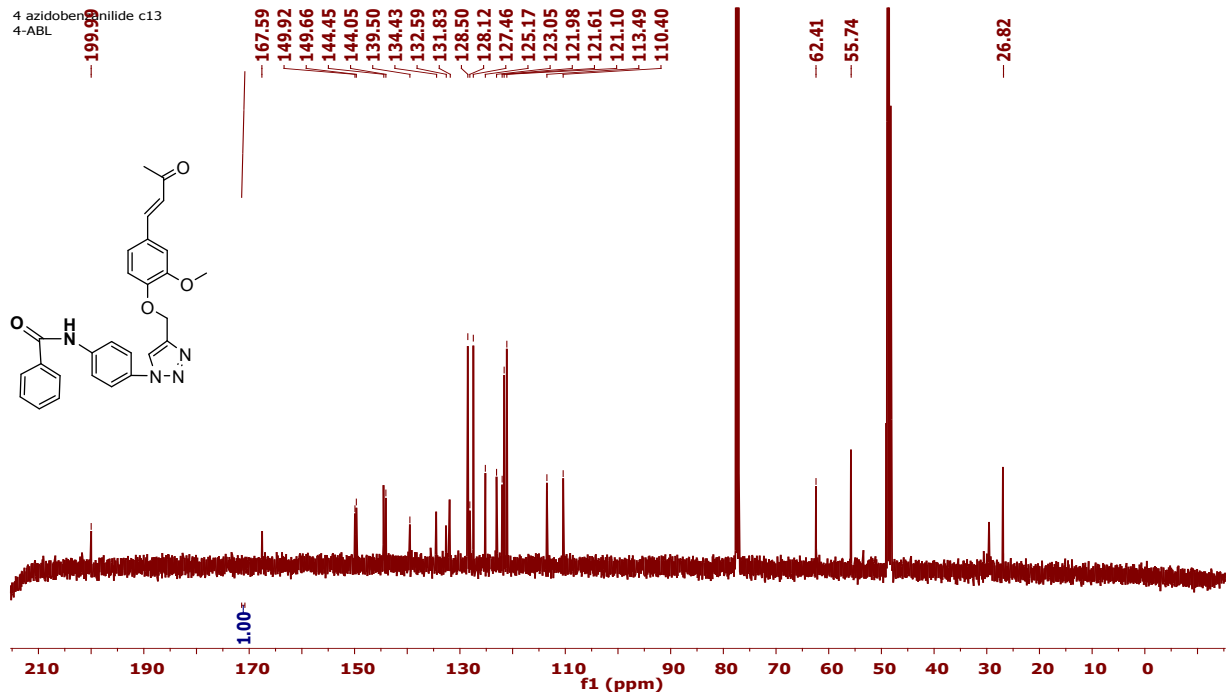



# HPLC and HRESIMS of 11

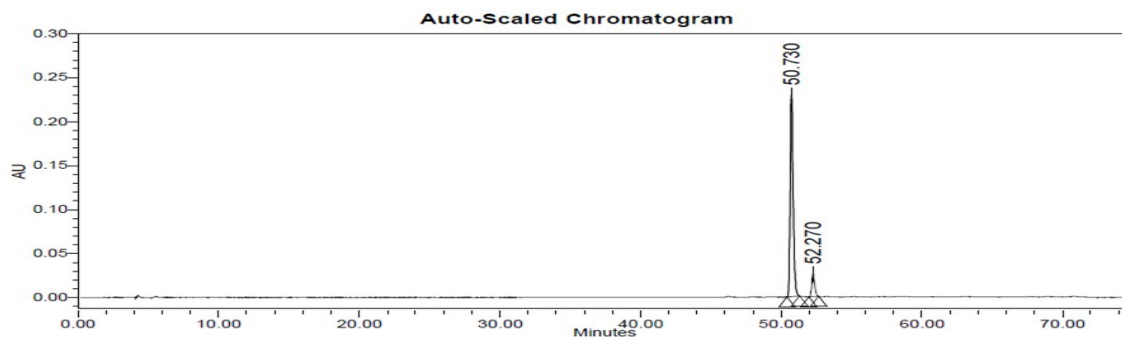

|   | RT     | Area (μV*sec) | % Area | Height (μV) |
|---|--------|---------------|--------|-------------|
| 1 | 50.730 | 3373764       | 90.06  | 229498      |
| 2 | 52.270 | 372346        | 9.94   | 25703       |

## Qualitative Compound Report

**Data File** 4-NO2-N3.d **Sample Name** 4-NO2-N3  
**Sample Type** Sample **Position** Vial 17  
**Instrument Name** Instrument 1 **User Name**  
**Acq Method** vishal\_12-01-13.m **Acquired Time** 02-03-2017 PM 2:01:04  
**IRM Calibration Status** Success **DA Method** daily\_report.m  
**Comment**

**Sample Group** **Info.**  
**Acquisition SW** 6200 series TOF/6500 series  
**Version** Q-TOF B.05.01 (B5125)

### Compound Table

| Compound Label        | RT  | Mass     | Formula       | MFG Formula   | MFG Diff (ppm) | DB Formula    |
|-----------------------|-----|----------|---------------|---------------|----------------|---------------|
| Cpd 33: C20 H18 N4 O5 | 0.3 | 394.1279 | C20 H18 N4 O5 | C20 H18 N4 O5 | -0.5           | C20 H18 N4 O5 |

| Compound Label        | m/z      | RT  | Algorithm                 | Mass     |
|-----------------------|----------|-----|---------------------------|----------|
| Cpd 33: C20 H18 N4 O5 | 395.1353 | 0.3 | Find by Molecular Feature | 394.1279 |

### MFE MS Spectrum

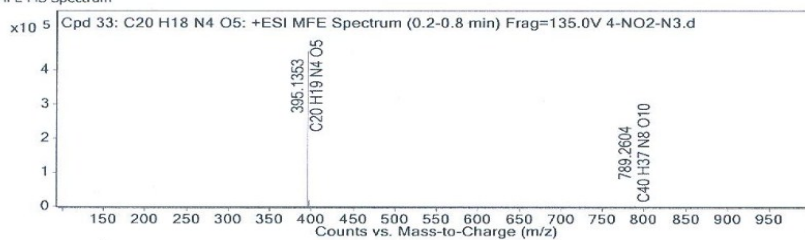

### MS Spectrum Peak List

| m/z      | z | Abund     | Formula        | Ion     |
|----------|---|-----------|----------------|---------|
| 395.1353 | 1 | 453710.78 | C20 H19 N4 O5  | (M+H)+  |
| 396.138  | 1 | 110469.45 | C20 H19 N4 O5  | (M+H)+  |
| 397.1403 | 1 | 16790.17  | C20 H19 N4 O5  | (M+H)+  |
| 398.143  | 1 | 2259.07   | C20 H19 N4 O5  | (M+H)+  |
| 789.2604 | 1 | 1785.77   | C40 H37 N8 O10 | (2M+H)+ |

### Predicted Isotope Match Table

| Isotope | m/z      | Calc m/z | Diff (ppm) | Abund % | Calc Abund % | Abund Sum % | Calc Abund Sum % |
|---------|----------|----------|------------|---------|--------------|-------------|------------------|
| 1       | 395.1353 | 395.135  | -0.68      | 100     | 100          | 77.79       | 78.37            |
| 2       | 396.138  | 396.138  | 0.07       | 24.35   | 23.5         | 18.94       | 18.42            |
| 3       | 397.1403 | 397.1405 | 0.51       | 3.7     | 3.67         | 2.88        | 2.88             |
| 4       | 398.143  | 398.143  | -0.08      | 0.5     | 0.43         | 0.39        | 0.34             |

# <sup>1</sup>H and <sup>13</sup>C NMR of 11:

N-3 NMR  
4-NO<sub>2</sub>-N3

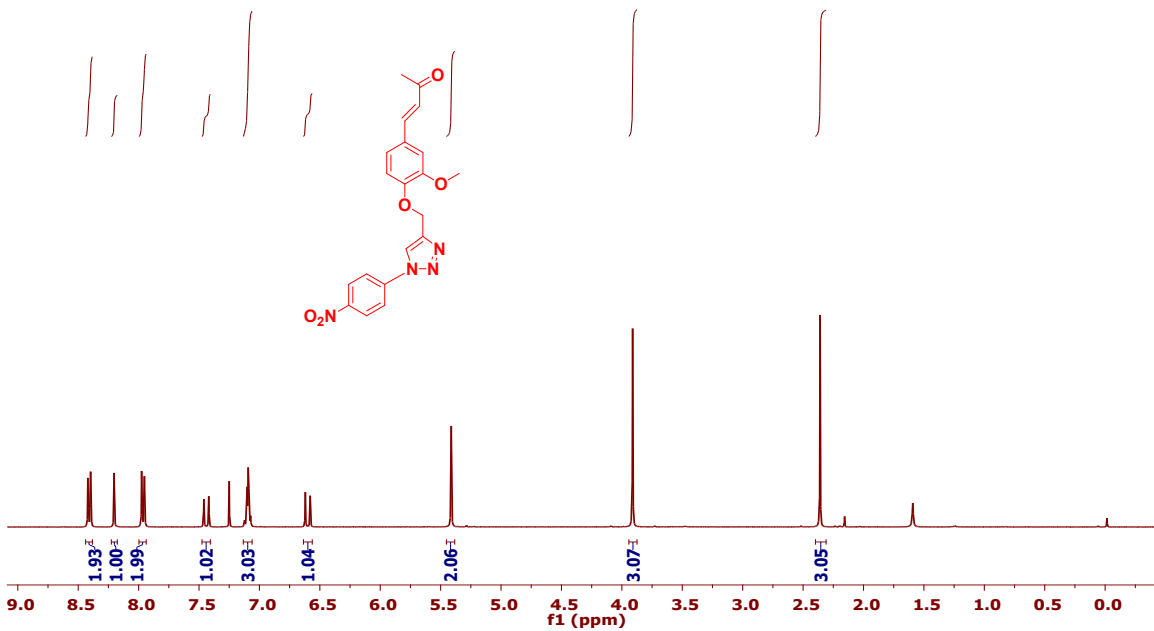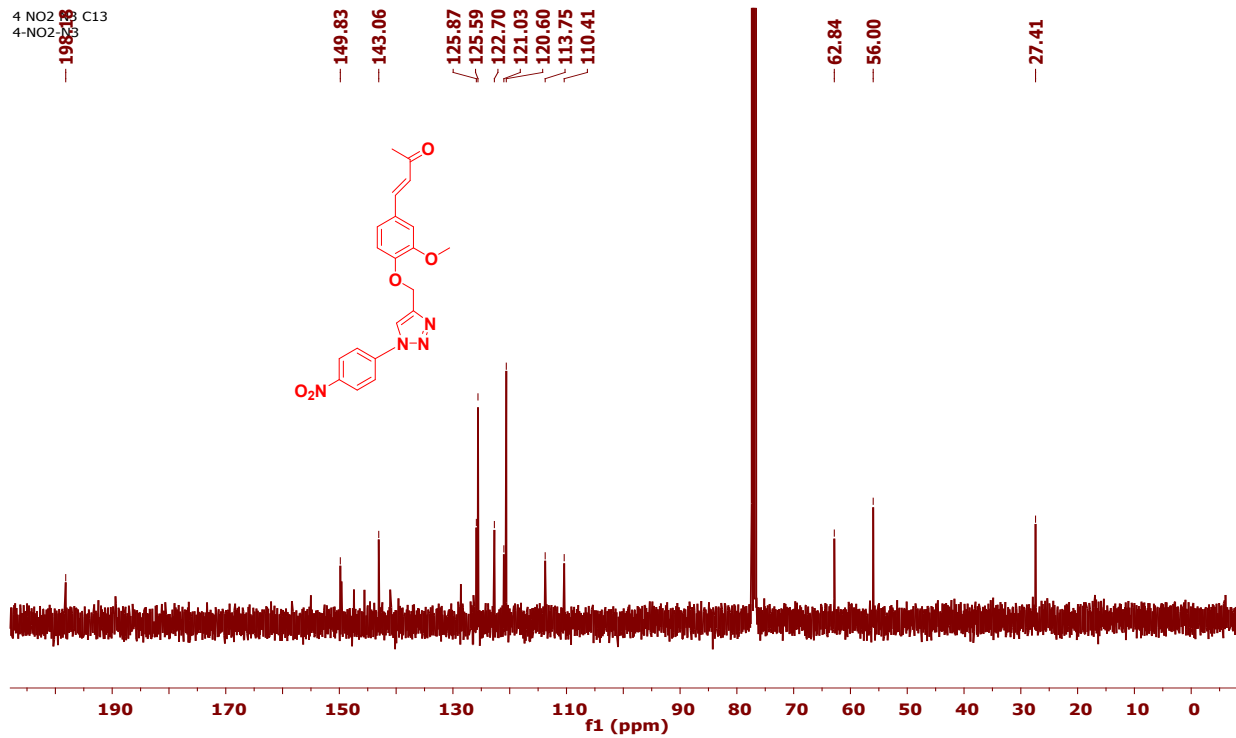

# HPLC AND HRESIMS of 12

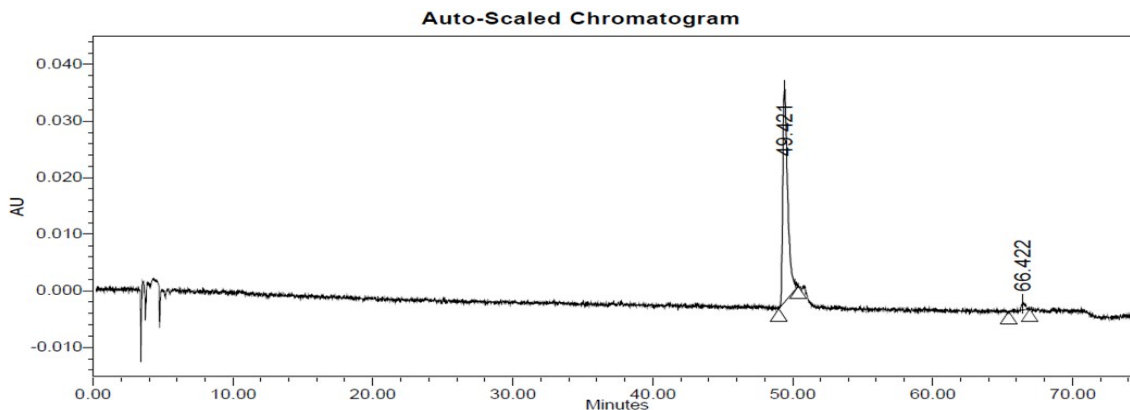

|   | RT     | Area (μV*sec) | % Area | Height (μV) |
|---|--------|---------------|--------|-------------|
| 1 | 49.421 | 899113        | 96.70  | 37602       |
| 2 | 66.422 | 30662         | 3.30   | 1072        |

## Qualitative Compound Report

**Data File** 4-Me-N3. d.d **Sample Name** 4-Me-N3  
**Sample Type** Sample **Position** Vial 29  
**Instrument Name** Instrument 1 **User Name**  
**Acq Method** vishal\_12-01-13.m **Acquired Time** 02-03-2017 PM 4:42:18  
**IRM Calibration Status** Success **DA Method** daily\_report.m \*  
**Comment**

**Sample Group** **Info.**  
**Acquisition SW** 6200 series TOF/6500 series  
**Version** Q-TOF B.05.01 (B5125)

### Compound Table

| Compound Label        | RT  | Mass     | Formula       | MFG Formula   | MFG Diff (ppm) | DB Formula    |
|-----------------------|-----|----------|---------------|---------------|----------------|---------------|
| Cpd 30: C21 H21 N3 O3 | 0.3 | 363.1582 | C21 H21 N3 O3 | C21 H21 N3 O3 | 0.29           | C21 H21 N3 O3 |

| Compound Label        | m/z      | RT  | Algorithm                 | Mass     |
|-----------------------|----------|-----|---------------------------|----------|
| Cpd 30: C21 H21 N3 O3 | 364.1653 | 0.3 | Find by Molecular Feature | 363.1582 |

### MFE MS Spectrum

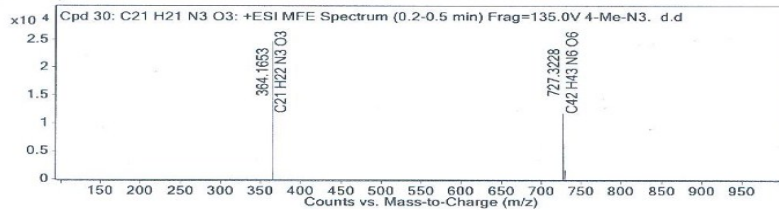

### MS Spectrum Peak List

| m/z      | z | Abund    | Formula       | Ion     |
|----------|---|----------|---------------|---------|
| 364.1653 | 1 | 24685.71 | C21 H22 N3 O3 | (M+H)+  |
| 365.1684 | 1 | 4761.32  | C21 H22 N3 O3 | (M+H)+  |
| 727.3228 | 1 | 11785.11 | C42 H43 N6 O6 | (2M+H)+ |
| 728.3263 | 1 | 6549.75  | C42 H43 N6 O6 | (2M+H)+ |
| 729.3291 | 1 | 1627.17  | C42 H43 N6 O6 | (2M+H)+ |

### Predicted Isotope Match Table

| Isotope | m/z      | Calc m/z | Diff (ppm) | Abund % | Calc Abund % | Abund Sum % | Calc Abund Sum % |
|---------|----------|----------|------------|---------|--------------|-------------|------------------|
| 1       | 364.1653 | 364.1656 | 0.7        | 100     | 100          | 80.15       | 78.38            |
| 2       | 365.1684 | 365.1687 | 0.86       | 19.29   | 24.18        | 15.46       | 18.95            |
| 3       | 366.1748 | 366.1714 | -9.24      | 5.47    | 3.41         | 4.39        | 2.68             |

--- End Of Report ---

# <sup>1</sup>H and <sup>13</sup>C NMR of 12:

4-ME N3 NMR  
4-ME-N3

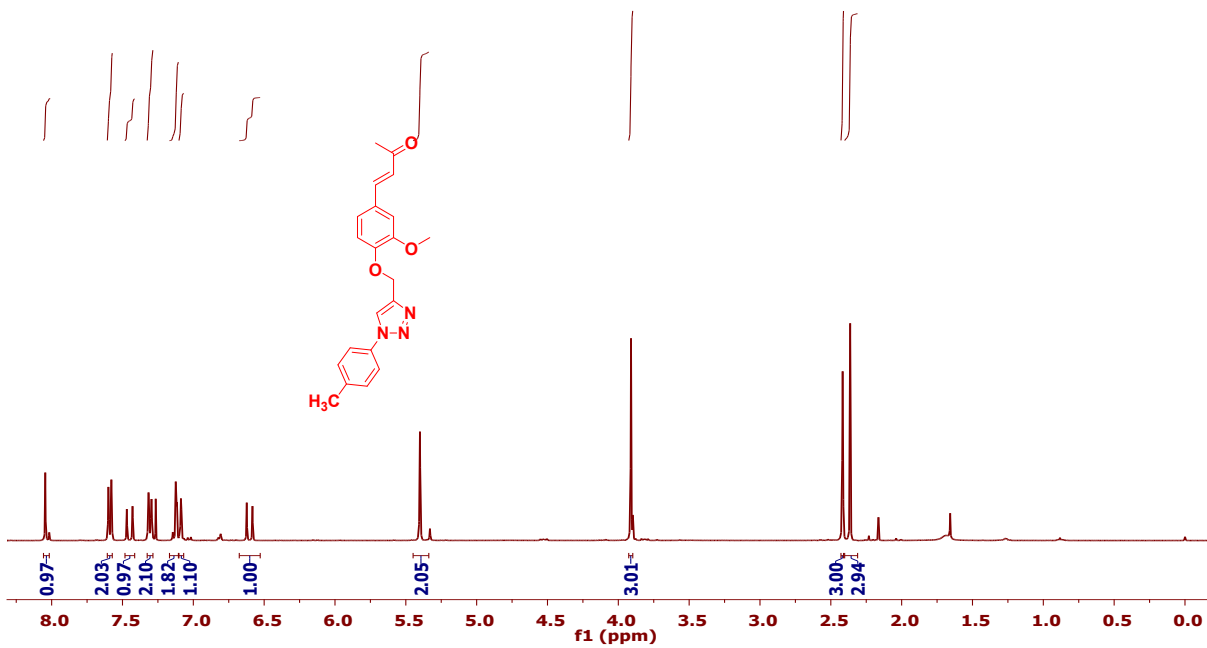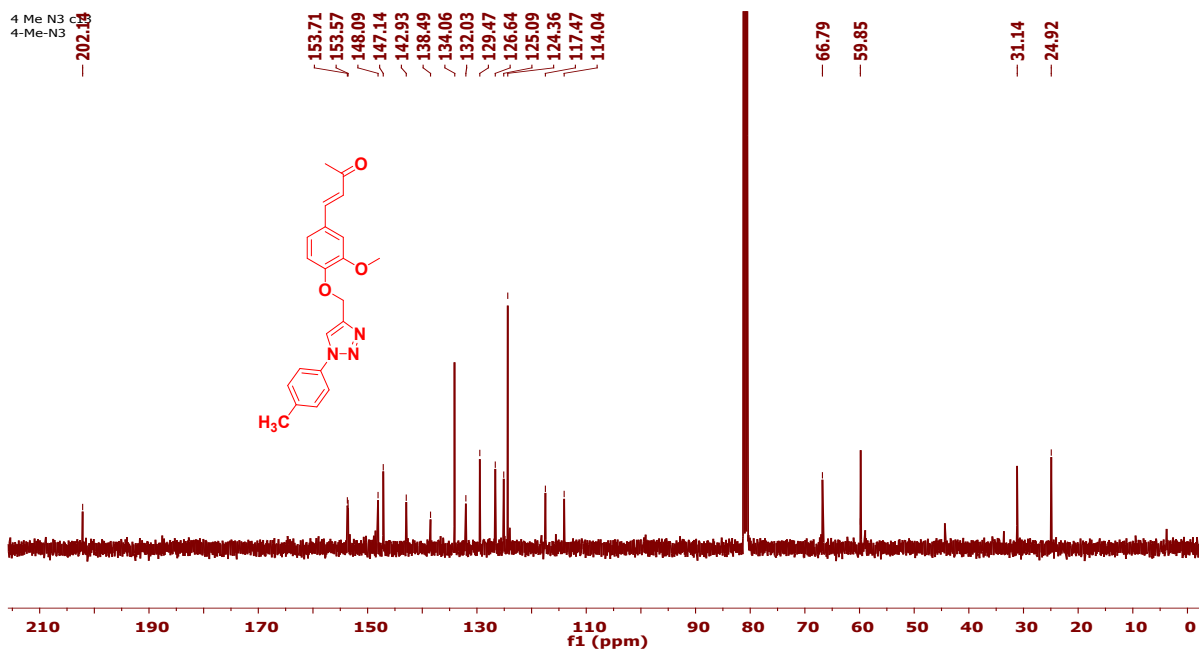

# HPLC AND HRESIMS of 13

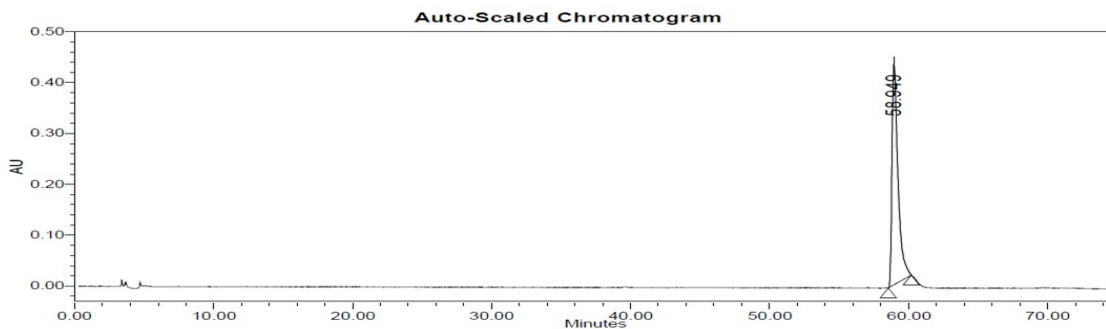

|   | RT     | Area (μV*sec) | % Area | Height (μV) |
|---|--------|---------------|--------|-------------|
| 1 | 58.949 | 13004162      | 100.00 | 433743      |

## Qualitative Compound Report

|                        |                   |               |                       |
|------------------------|-------------------|---------------|-----------------------|
| Data File              | DICF3.d           | Sample Name   | DICF3                 |
| Sample Type            | Sample            | Position      | Vial 22               |
| Instrument Name        | Instrument 1      | User Name     |                       |
| Acq Method             | vishal_12-01-13.m | Acquired Time | 02-03-2017 PM 2:27:05 |
| IRM Calibration Status | Success           | DA Method     | daily_report.m        |
| Comment                |                   |               |                       |

Sample Group: Info.  
 Acquisition SW: 6200 series TOF/6500 series  
 Version: Q-TOF B.05.01 (B5125)

### Compound Table

| Compound Label           | RT  | Mass     | Formula          | MFG Formula      | MFG Diff (ppm) | DB Formula       |
|--------------------------|-----|----------|------------------|------------------|----------------|------------------|
| Cpd 28: C22 H17 F6 N3 O3 | 0.3 | 485.1164 | C22 H17 F6 N3 O3 | C22 H17 F6 N3 O3 | 2.06           | C22 H17 F6 N3 O3 |

| Compound Label           | m/z      | RT  | Algorithm                 | Mass     |
|--------------------------|----------|-----|---------------------------|----------|
| Cpd 28: C22 H17 F6 N3 O3 | 486.1236 | 0.3 | Find by Molecular Feature | 485.1164 |

### MFE MS Spectrum

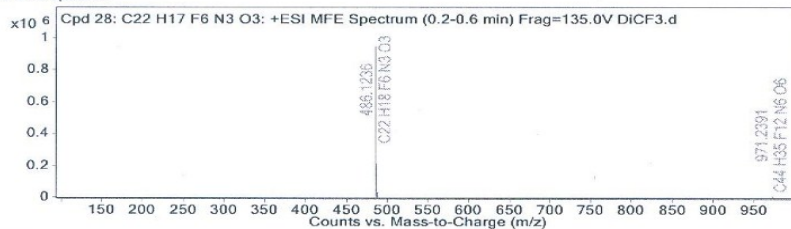

### MS Spectrum Peak List

| m/z      | z | Abund     | Formula           | Ion     |
|----------|---|-----------|-------------------|---------|
| 486.1236 | 1 | 946160.19 | C22 H18 F6 N3 O3  | (M+H)+  |
| 487.127  | 1 | 214418.77 | C22 H18 F6 N3 O3  | (M+H)+  |
| 488.1298 | 1 | 32304.5   | C22 H18 F6 N3 O3  | (M+H)+  |
| 971.2391 | 1 | 9787.14   | C44 H35 F12 N6 O6 | (2M+H)+ |
| 972.2433 | 1 | 5623.22   | C44 H35 F12 N6 O6 | (2M+H)+ |

### Predicted Isotope Match Table

| Isotope | m/z      | Calc m/z | Diff (ppm) | Abund % | Calc Abund % | Abund Sum % | Calc Abund Sum % |
|---------|----------|----------|------------|---------|--------------|-------------|------------------|
| 1       | 486.1236 | 486.1247 | 2.18       | 100     | 100          | 79.05       | 77.34            |
| 2       | 487.127  | 487.1278 | 1.58       | 22.66   | 25.21        | 17.91       | 19.5             |
| 3       | 488.1298 | 488.1306 | 1.61       | 3.41    | 3.66         | 2.7         | 2.83             |
| 4       | 489.1318 | 489.1332 | 2.79       | 0.36    | 0.39         | 0.29        | 0.3              |
| 5       | 490.1355 | 490.1358 | 0.54       | 0.06    | 0.03         | 0.05        | 0.03             |
| 6       | 491.1367 | 491.1384 | 3.36       | 0.01    | 0            | 0.01        | 0                |

--- End Of Report ---

# <sup>1</sup>H and <sup>13</sup>C NMR of 13:

N-3 NMR  
DI-CF3-N3

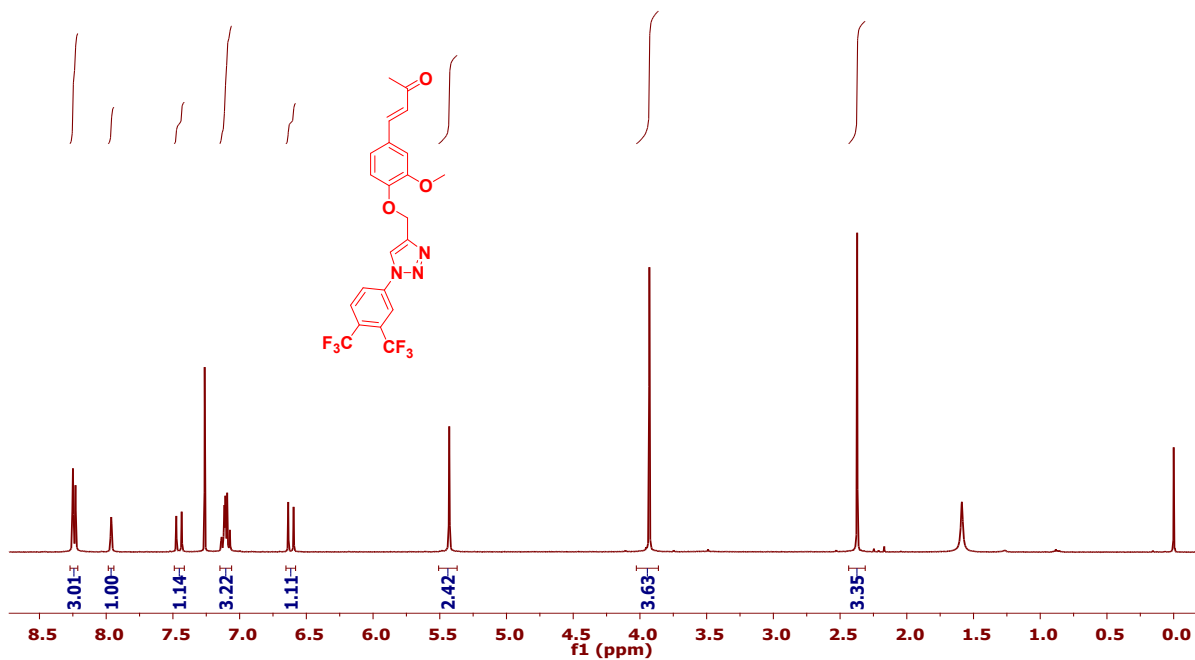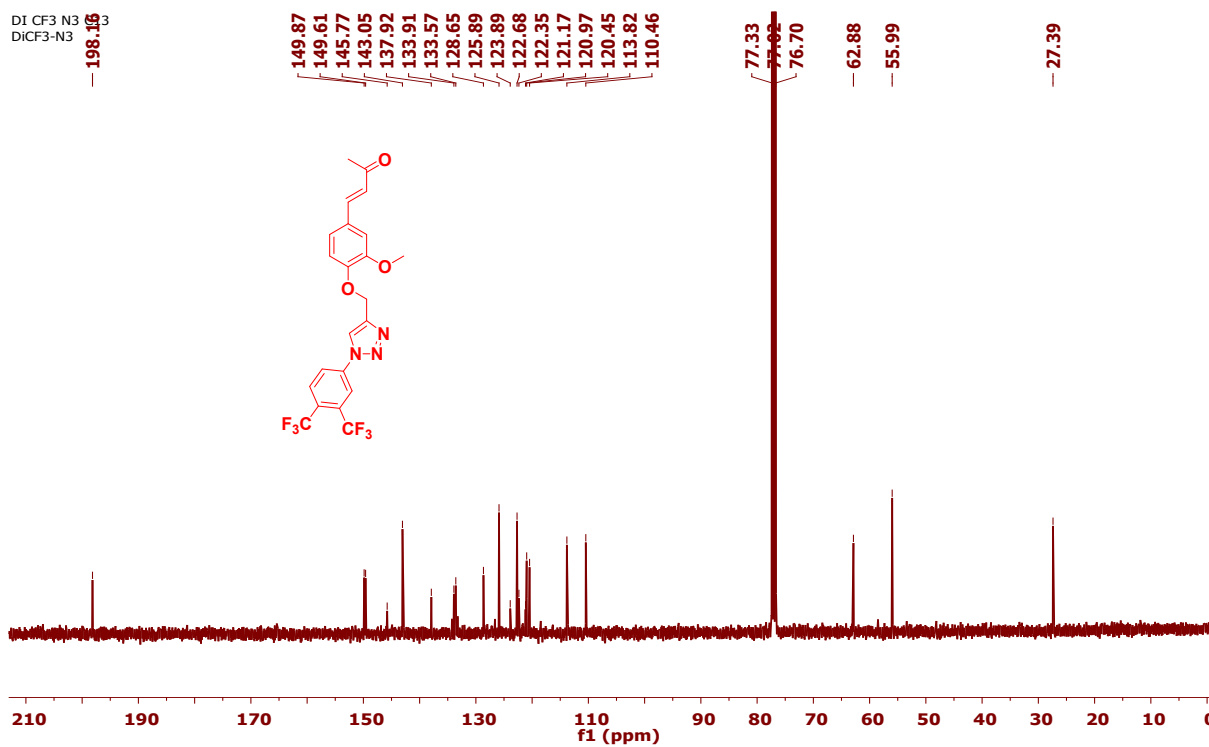



# HPLC AND HRESIMS of 14

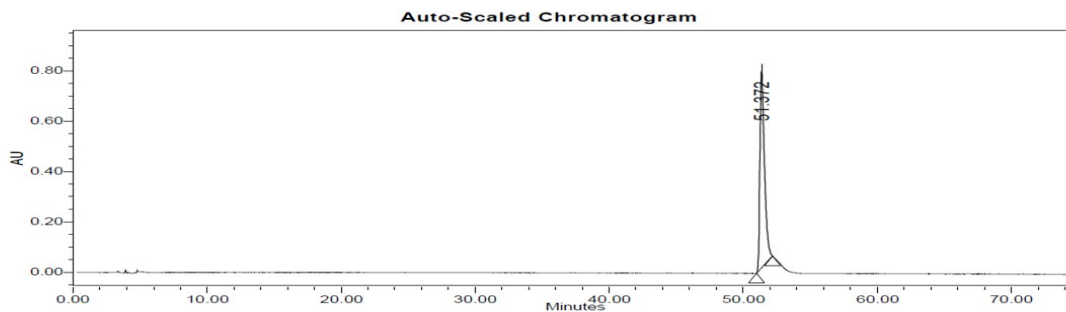

|   | RT     | Area<br>( $\mu\text{V}\cdot\text{sec}$ ) | % Area | Height<br>( $\mu\text{V}$ ) |
|---|--------|------------------------------------------|--------|-----------------------------|
| 1 | 51.372 | 18650988                                 | 100.00 | 781377                      |

## Qualitative Compound Report

|                        |                  |               |                       |
|------------------------|------------------|---------------|-----------------------|
| Data File              | Et-4-N3.d        | Sample Name   | Et-4-N3               |
| Sample Type            | Sample           | Position      | Vial 21               |
| Instrument Name        | Instrument 1     | User Name     |                       |
| Acq Method             | visha_12-01-13.m | Acquired Time | 02-03-2017 PM 2:21:24 |
| IRM Calibration Status | Success          | DA Method     | daily_report.m        |
| Comment                |                  |               |                       |

|                |                             |       |
|----------------|-----------------------------|-------|
| Sample Group   |                             | Info. |
| Acquisition SW | 6200 series TOF/6500 series |       |
| Version        | Q-TOF B.05.01 (B5125)       |       |

### Compound Table

| Compound Label        | RT  | Mass     | Formula       | MFG Formula   | MFG Diff (ppm) | DB Formula    |
|-----------------------|-----|----------|---------------|---------------|----------------|---------------|
| Cpd 21: C23 H23 N3 O5 | 0.3 | 421.1645 | C23 H23 N3 O5 | C23 H23 N3 O5 | -1.64          | C23 H23 N3 O5 |

| Compound Label        | m/z      | RT  | Algorithm                 | Mass     |
|-----------------------|----------|-----|---------------------------|----------|
| Cpd 21: C23 H23 N3 O5 | 422.1716 | 0.3 | Find by Molecular Feature | 421.1645 |

### MFE MS Spectrum

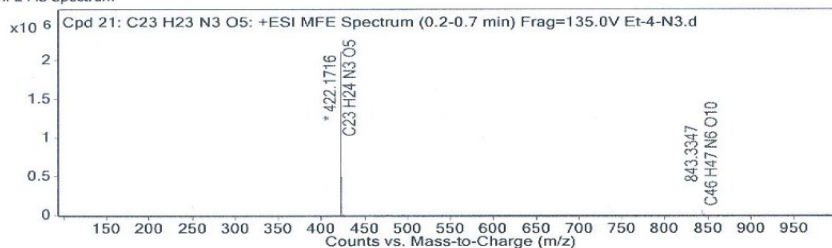

### MS Spectrum Peak List

| m/z      | z | Abund     | Formula        | Ion     |
|----------|---|-----------|----------------|---------|
| 422.1716 | 1 | 2107891   | C23 H24 N3 O5  | (M+H)+  |
| 423.1754 | 1 | 492218.19 | C23 H24 N3 O5  | (M+H)+  |
| 424.1775 | 1 | 77694.05  | C23 H24 N3 O5  | (M+H)+  |
| 843.3347 | 1 | 58736.14  | C46 H47 N6 O10 | (2M+H)+ |
| 844.3382 | 1 | 31014.43  | C46 H47 N6 O10 | (2M+H)+ |

### Predicted Isotope Match Table

| Isotope | m/z      | Calc m/z | Diff (ppm) | Abund % | Calc Abund % | Abund Sum % | Calc Abund Sum % |
|---------|----------|----------|------------|---------|--------------|-------------|------------------|
| 1       | 422.1716 | 422.171  | -1.32      | 100     | 100          | 78.42       | 76.09            |
| 2       | 423.1754 | 423.1742 | -2.96      | 23.35   | 26.44        | 18.31       | 20.12            |
| 3       | 424.1775 | 424.1768 | -1.67      | 3.69    | 4.39         | 2.89        | 3.34             |
| 4       | 425.1804 | 425.1794 | -2.21      | 0.43    | 0.54         | 0.34        | 0.41             |
| 5       | 426.1827 | 426.182  | -1.78      | 0.05    | 0.05         | 0.04        | 0.04             |



# <sup>1</sup>H and <sup>13</sup>C NMR of 14:

Et-4-NH2 BENZOATE NMR  
ET-4-NH2-BENZOATE

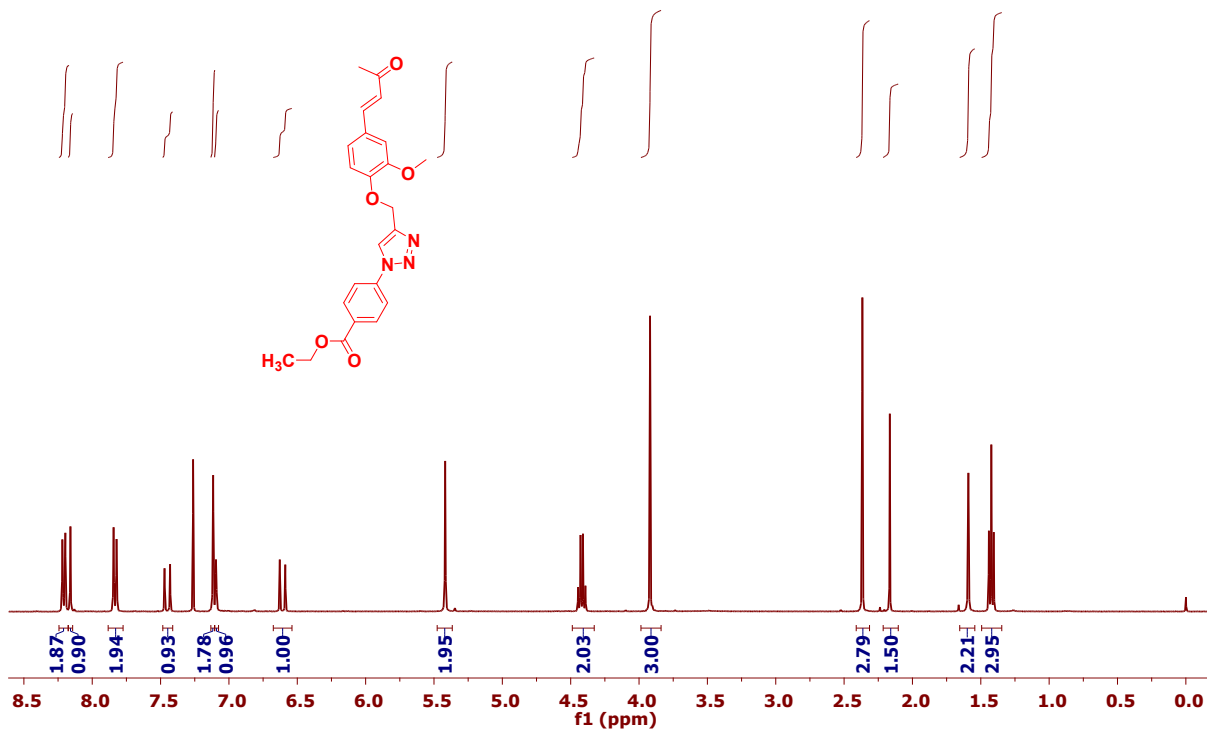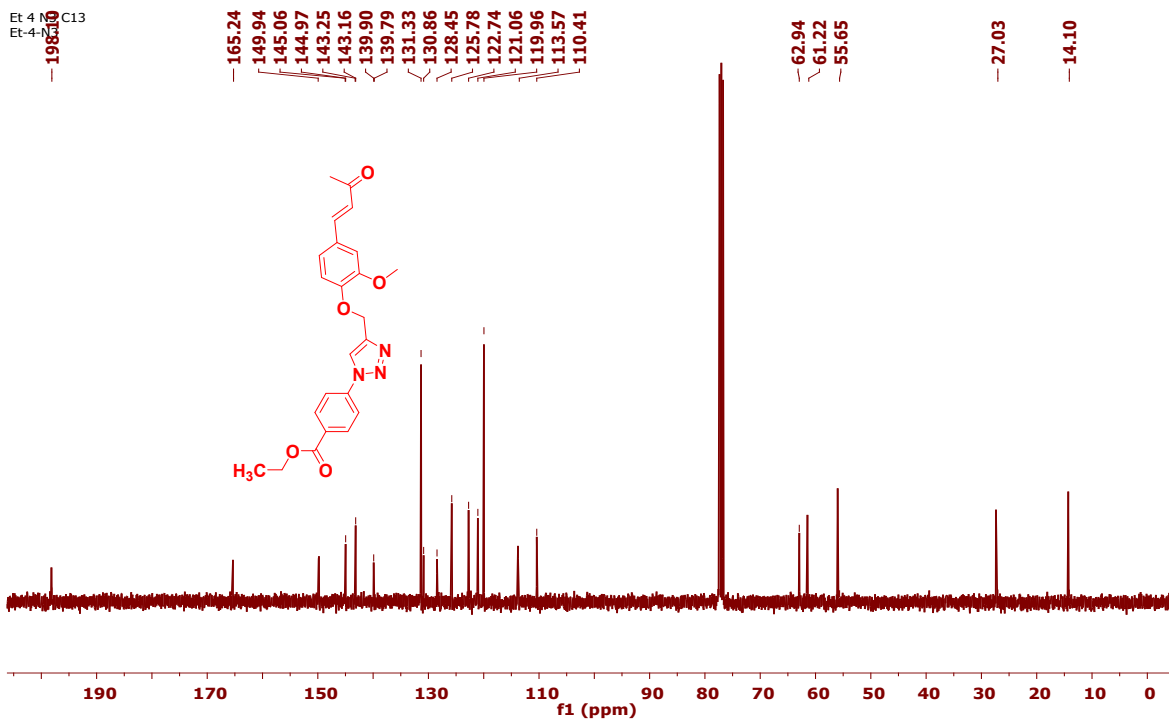

# HPLC AND HRESIMS of 15

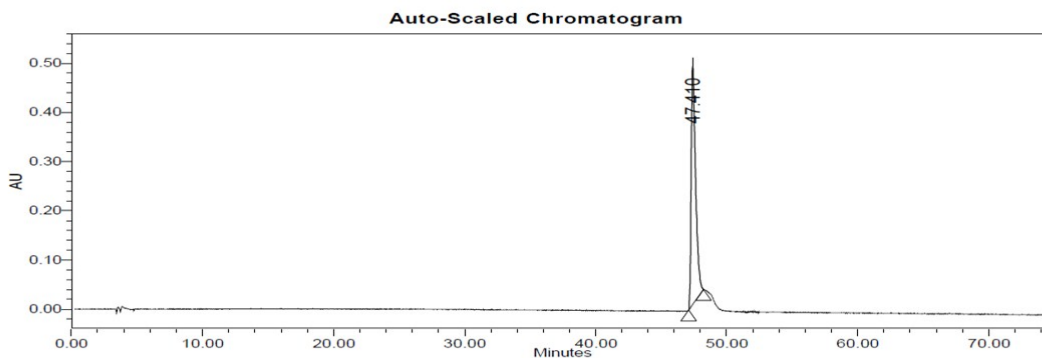

|   | RT     | Area<br>( $\mu\text{V}\cdot\text{sec}$ ) | % Area | Height<br>( $\mu\text{V}$ ) |
|---|--------|------------------------------------------|--------|-----------------------------|
| 1 | 47.410 | 11173027                                 | 100.00 | 485713                      |

## Qualitative Compound Report

**Data File** 2-CL-N3.d **Sample Name** 2-CL-N3  
**Sample Type** Sample **Position** Vial 18  
**Instrument Name** Instrument 1 **User Name**  
**Acq Method** vishal\_12-01-13.m **Acquired Time** 02-03-2017 PM 2:05:24  
**IRM Calibration Status** Success **DA Method** daily\_report.m  
**Comment**

**Sample Group** **Info.**  
**Acquisition SW** 6200 series TOF/6500 series  
**Version** Q-TOF B.05.01 (B5125)

### Compound Table

| Compound Label           | RT  | Mass     | Formula          | MFG Formula      | MFG Diff (ppm) | DB Formula       |
|--------------------------|-----|----------|------------------|------------------|----------------|------------------|
| Cpd 27: C20 H18 Cl N3 O3 | 0.3 | 383.1041 | C20 H18 Cl N3 O3 | C20 H18 Cl N3 O3 | -1.07          | C20 H18 Cl N3 O3 |

| Compound Label           | m/z      | RT  | Algorithm                 | Mass     |
|--------------------------|----------|-----|---------------------------|----------|
| Cpd 27: C20 H18 Cl N3 O3 | 384.1114 | 0.3 | Find by Molecular Feature | 383.1041 |

### MFE MS Spectrum

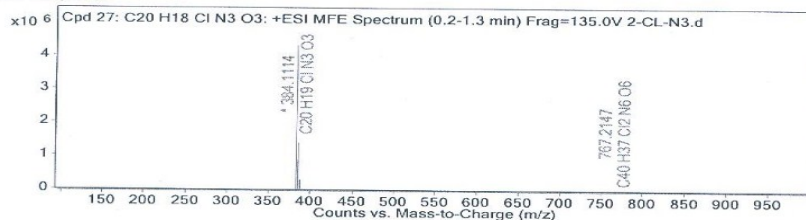

### MS Spectrum Peak List

| m/z      | z | Abund      | Formula          | Ion    |
|----------|---|------------|------------------|--------|
| 384.1114 | 1 | 4310781.5  | C20 H19 Cl N3 O3 | (M+H)+ |
| 385.1145 | 1 | 876818.56  | C20 H19 Cl N3 O3 | (M+H)+ |
| 386.109  | 1 | 1399216.13 | C20 H19 Cl N3 O3 | (M+H)+ |
| 387.1121 | 1 | 286429.41  | C20 H19 Cl N3 O3 | (M+H)+ |
| 388.1145 | 1 | 34656.31   | C20 H19 Cl N3 O3 | (M+H)+ |

### Predicted Isotope Match Table

| Isotope | m/z      | Calc m/z | Diff (ppm) | Abund % | Calc Abund % | Abund Sum % | Calc Abund Sum % |
|---------|----------|----------|------------|---------|--------------|-------------|------------------|
| 1       | 384.1114 | 384.1109 | -1.18      | 100     | 100          | 62.37       | 59.86            |
| 2       | 385.1145 | 385.114  | -1.22      | 20.34   | 23.06        | 12.69       | 13.8             |
| 3       | 386.109  | 386.1088 | -0.46      | 32.46   | 35.15        | 20.24       | 21.04            |
| 4       | 387.1121 | 387.1114 | -1.78      | 6.64    | 7.7          | 4.14        | 4.61             |
| 5       | 388.1145 | 388.114  | -1.46      | 0.8     | 1.04         | 0.5         | 0.62             |
| 6       | 389.1165 | 389.1165 | -0.06      | 0.08    | 0.1          | 0.05        | 0.06             |
| 7       | 390.1158 | 390.119  | 8.39       | 0.02    | 0.01         | 0.01        | 0                |

# <sup>1</sup>H and <sup>13</sup>C NMR of 15:

2-Cl-N3 NMR  
2-CL-N3

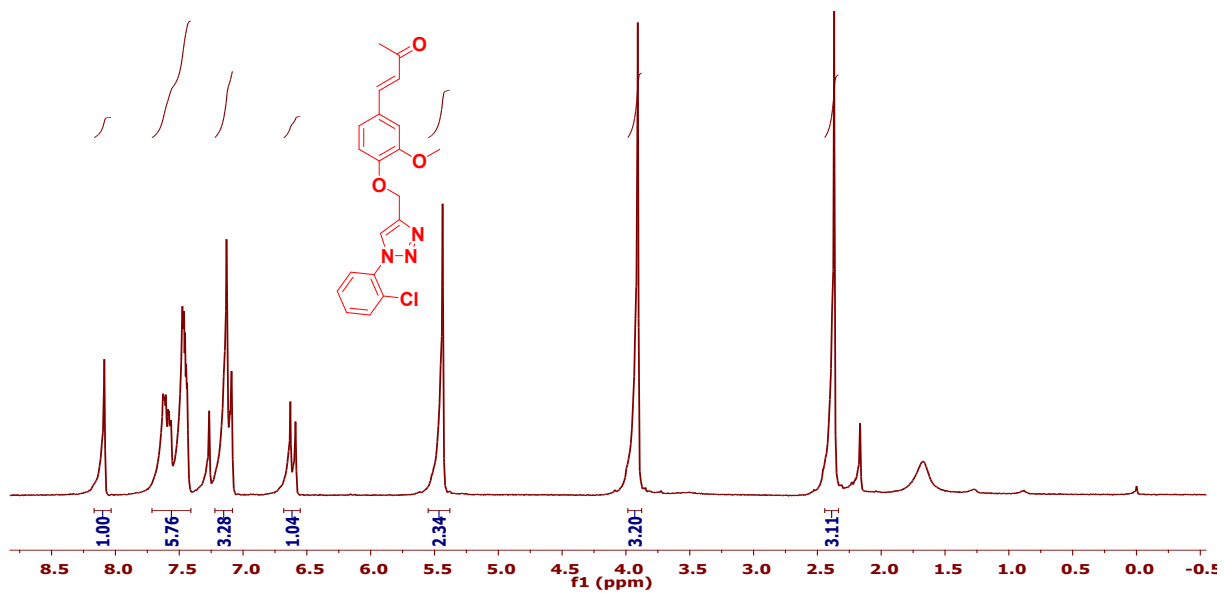

2-Cl-N-3-c13  
2-CL-N3

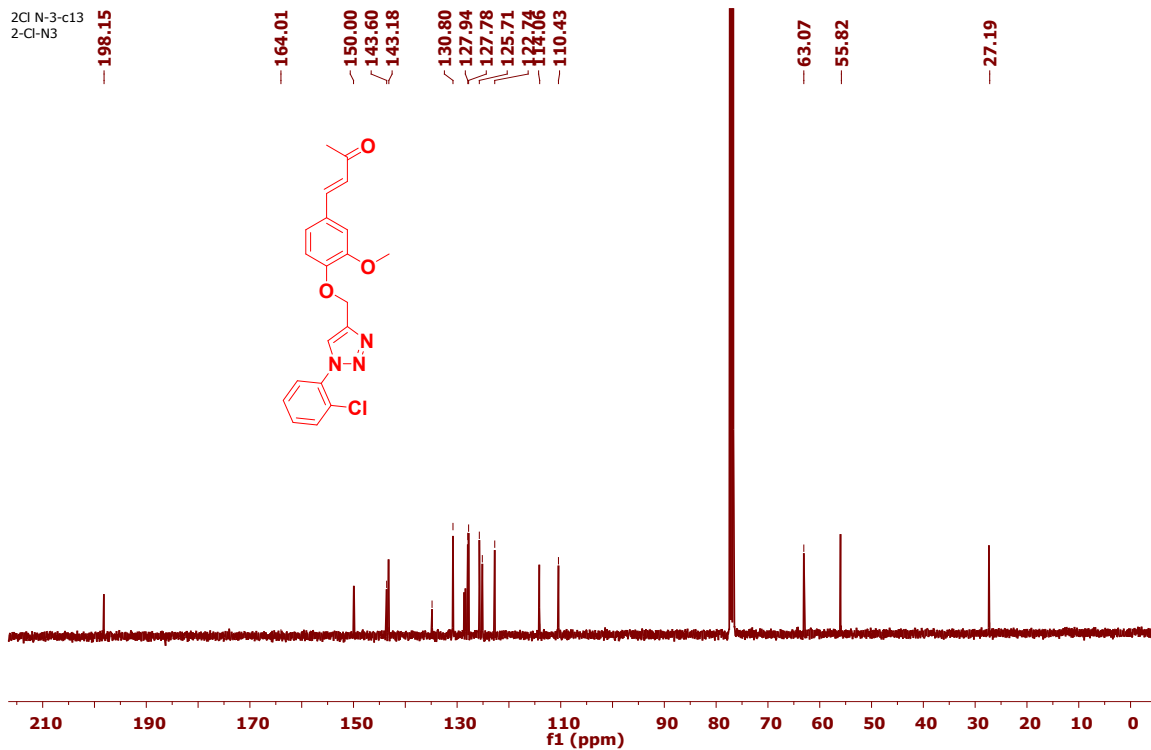

# HPLC AND HRESIMS of 16

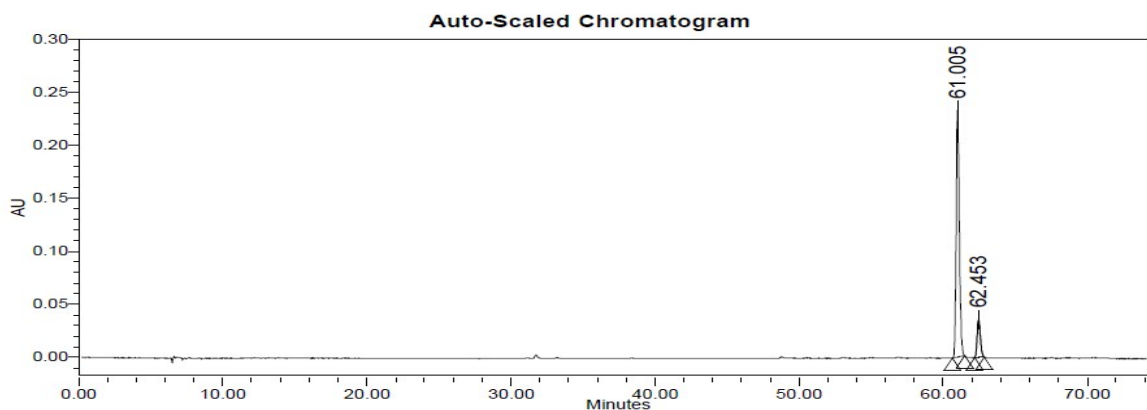

|   | RT     | Area (μV*sec) | % Area | Height (μV) |
|---|--------|---------------|--------|-------------|
| 1 | 61.005 | 3533336       | 86.64  | 233206      |
| 2 | 62.453 | 544676        | 13.36  | 35509       |

## Qualitative Compound Report

|                               |                   |                      |                       |
|-------------------------------|-------------------|----------------------|-----------------------|
| <b>Data File</b>              | BiPhenyl.d        | <b>Sample Name</b>   | BiPhenyl              |
| <b>Sample Type</b>            | Sample            | <b>Position</b>      | Vial 32               |
| <b>Instrument Name</b>        | Instrument 1      | <b>User Name</b>     |                       |
| <b>Acq Method</b>             | vishal_12-01-13.m | <b>Acquired Time</b> | 02-03-2017 PM 3:19:08 |
| <b>IRM Calibration Status</b> | Success           | <b>DA Method</b>     | daily_report.m        |
| <b>Comment</b>                |                   |                      |                       |

|                       |                             |              |
|-----------------------|-----------------------------|--------------|
| <b>Sample Group</b>   |                             | <b>Info.</b> |
| <b>Acquisition SW</b> | 6200 series TOF/6500 series |              |
| <b>Version</b>        | Q-TOF B.05.01 (B5125)       |              |

### Compound Table

| Compound Label        | RT  | Mass     | Formula       | MFG Formula   | MFG Diff (ppm) | DB Formula    |
|-----------------------|-----|----------|---------------|---------------|----------------|---------------|
| Cpd 88: C26 H23 N3 O3 | 0.4 | 425.1736 | C26 H23 N3 O3 | C26 H23 N3 O3 | 0.72           | C26 H23 N3 O3 |

| Compound Label        | m/z      | RT  | Algorithm                 | Mass     |
|-----------------------|----------|-----|---------------------------|----------|
| Cpd 88: C26 H23 N3 O3 | 426.1808 | 0.4 | Find by Molecular Feature | 425.1736 |

### MFE MS Spectrum

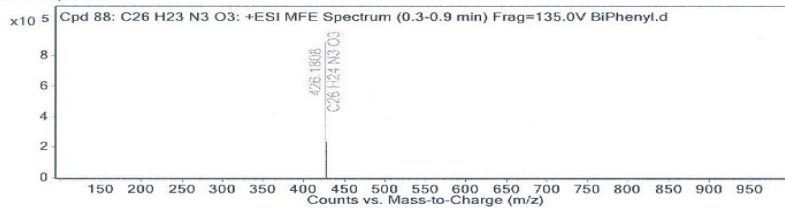

### MS Spectrum Peak List

| m/z      | z | Abund     | Formula       | Ion    |
|----------|---|-----------|---------------|--------|
| 426.1808 | 1 | 891663.13 | C26 H24 N3 O3 | (M+H)+ |
| 427.1843 | 1 | 236538.78 | C26 H24 N3 O3 | (M+H)+ |
| 428.1876 | 1 | 30722     | C26 H24 N3 O3 | (M+H)+ |
| 429.1901 | 1 | 3786.38   | C26 H24 N3 O3 | (M+H)+ |

### Predicted Isotope Match Table

| Isotope | m/z      | Calc m/z | Diff (ppm) | Abund % | Calc Abund % | Abund Sum % | Calc Abund Sum % |
|---------|----------|----------|------------|---------|--------------|-------------|------------------|
| 1       | 426.1808 | 426.1812 | 0.91       | 100     |              | 76.69       | 74.06            |
| 2       | 427.1843 | 427.1844 | 0.25       | 26.53   | 29.61        | 20.34       | 21.93            |
| 3       | 428.1876 | 428.1873 | -0.92      | 3.45    | 4.85         | 2.64        | 3.59             |
| 4       | 429.1901 | 429.19   | -0.35      | 0.42    | 0.57         | 0.33        | 0.42             |

# <sup>1</sup>H and <sup>13</sup>C NMR of 16

N-3 NMR  
BiPhenyl-N3

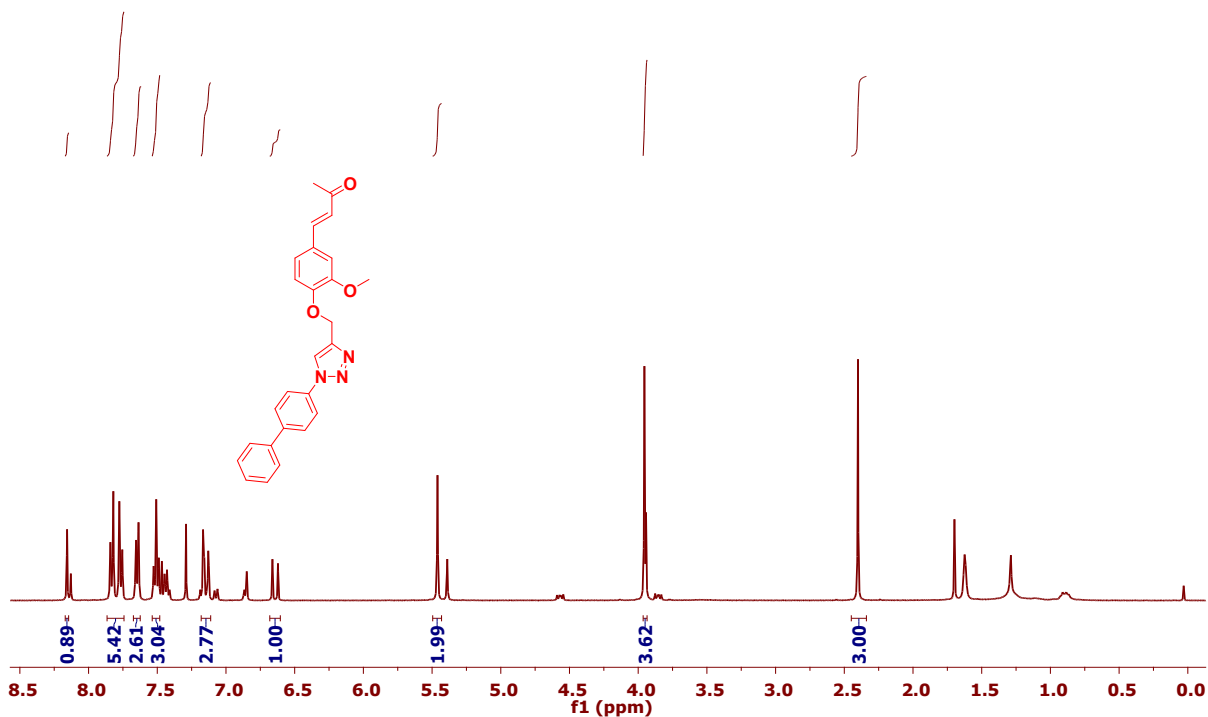

24-feb-c130 metan  
Bi Phenyl-N3

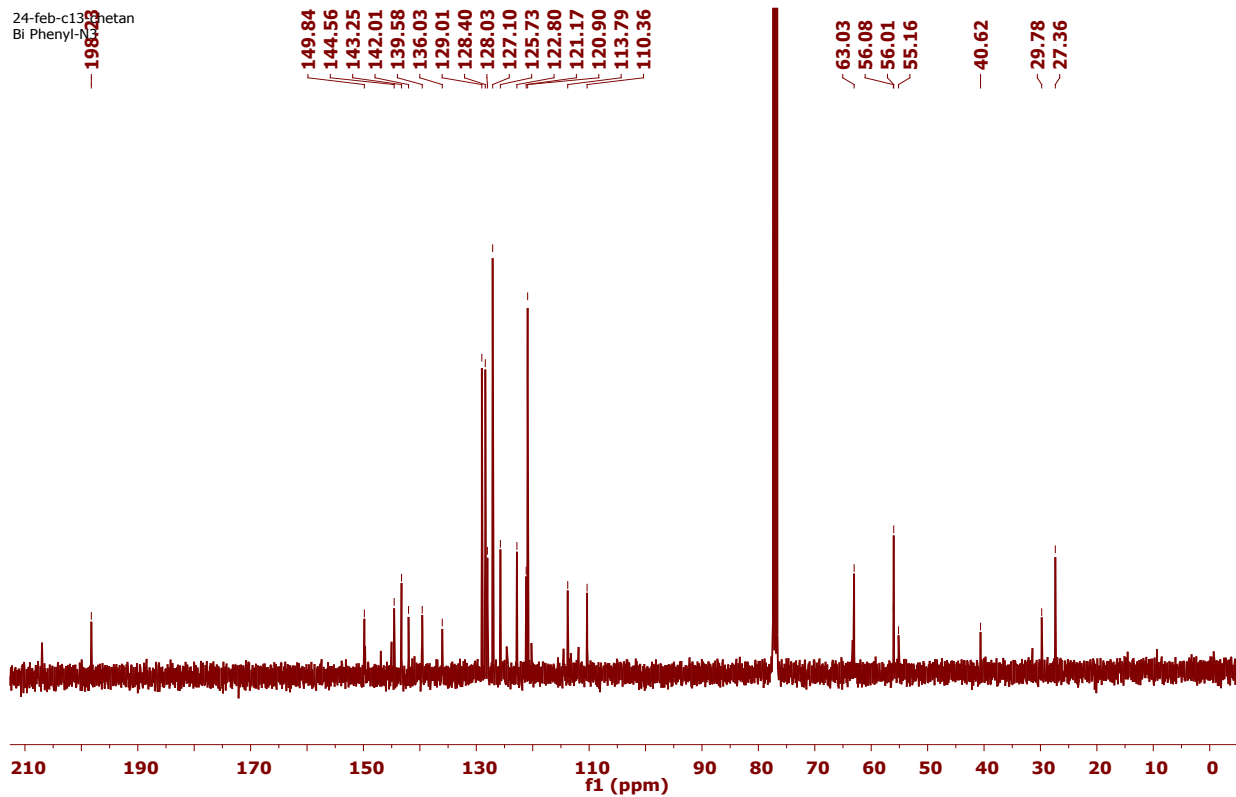

# HPLC AND HRESIMS of 17

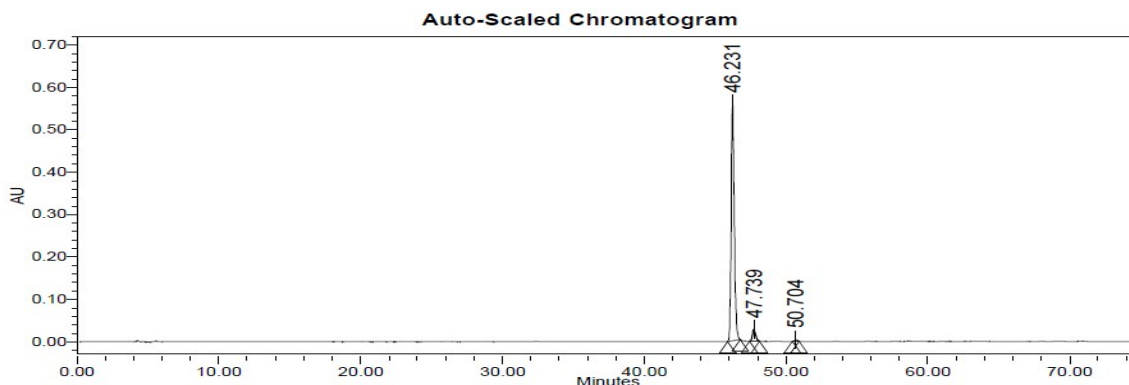

|   | RT     | Area (μV*sec) | % Area | Height (μV) |
|---|--------|---------------|--------|-------------|
| 1 | 46.231 | 8483846       | 94.64  | 559419      |
| 2 | 47.739 | 435132        | 4.85   | 27874       |
| 3 | 50.704 | 45153         | 0.50   | 3156        |

## Qualitative Compound Report

|                               |                   |                      |                       |
|-------------------------------|-------------------|----------------------|-----------------------|
| <b>Data File</b>              | 4-CHO-N3.d        | <b>Sample Name</b>   | 4-CHO-N3              |
| <b>Sample Type</b>            | Sample            | <b>Position</b>      | Vial 33               |
| <b>Instrument Name</b>        | Instrument 1      | <b>User Name</b>     |                       |
| <b>Acq Method</b>             | vishal_12-01-13.m | <b>Acquired Time</b> | 02-03-2017 PM 3:23:29 |
| <b>IRM Calibration Status</b> | Success           | <b>DA Method</b>     | daily_report.m        |
| <b>Comment</b>                |                   |                      |                       |

|                       |                             |              |
|-----------------------|-----------------------------|--------------|
| <b>Sample Group</b>   |                             | <b>Info.</b> |
| <b>Acquisition SW</b> | 6200 series TOF/6500 series |              |
| <b>Version</b>        | Q-TOF B.05.01 (B5125)       |              |

### Compound Table

| Compound Label        | RT  | Mass     | Formula       | MFG Formula   | MFG Diff (ppm) | DB Formula    |
|-----------------------|-----|----------|---------------|---------------|----------------|---------------|
| Cpd 58: C21 H19 N3 O4 | 0.3 | 377.1373 | C21 H19 N3 O4 | C21 H19 N3 O4 | 0.65           | C21 H19 N3 O4 |

| Compound Label        | m/z      | RT  | Algorithm                 | Mass     |
|-----------------------|----------|-----|---------------------------|----------|
| Cpd 58: C21 H19 N3 O4 | 378.1444 | 0.3 | Find by Molecular Feature | 377.1373 |

### MFE MS Spectrum

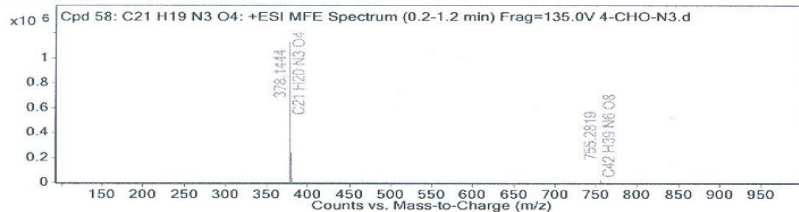

### MS Spectrum Peak List

| m/z      | z | Abund      | Formula       | Ion     |
|----------|---|------------|---------------|---------|
| 378.1444 | 1 | 1125335.38 | C21 H20 N3 O4 | (M+H)+  |
| 379.1481 | 1 | 244306.41  | C21 H20 N3 O4 | (M+H)+  |
| 380.1522 | 1 | 39587.66   | C21 H20 N3 O4 | (M+H)+  |
| 755.2819 | 1 | 16195.12   | C42 H39 N6 O8 | (2M+H)+ |
| 756.2848 | 1 | 7187.93    | C42 H39 N6 O8 | (2M+H)+ |

### Predicted Isotope Match Table

| Isotope | m/z      | Calc m/z | Diff (ppm) | Abund % | Calc Abund % | Abund Sum % | Calc Abund Sum % |
|---------|----------|----------|------------|---------|--------------|-------------|------------------|
| 1       | 378.1444 | 378.1448 | 1.08       | 100     | 100          | 79.57       | 77.99            |
| 2       | 379.1481 | 379.1479 | -0.33      | 21.71   | 24.19        | 17.27       | 18.87            |
| 3       | 380.1522 | 380.1506 | -4.22      | 3.52    | 3.62         | 2.8         | 2.83             |
| 4       | 381.1568 | 381.1532 | -9.52      | 0.46    | 0.41         | 0.36        | 0.32             |

# $^1\text{H}$ and $^{13}\text{C}$ NMR of 17:

4-CHO-N3 NMR  
4-CHO-N3

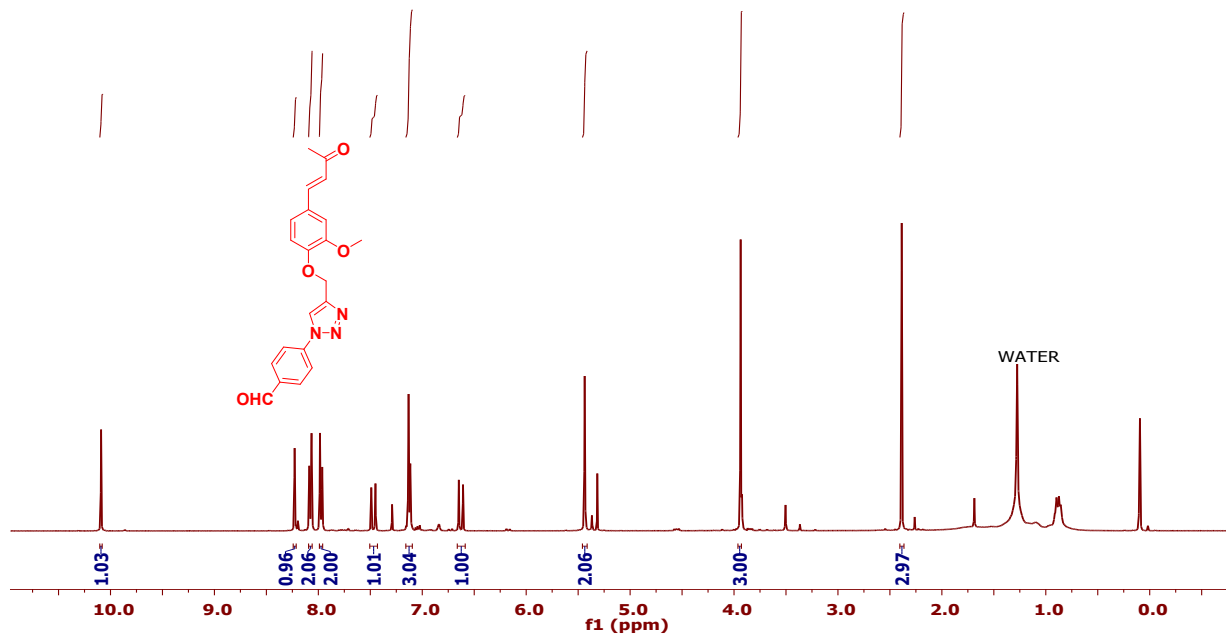

4-CHO-N3 NMR  
4-CHO-N3

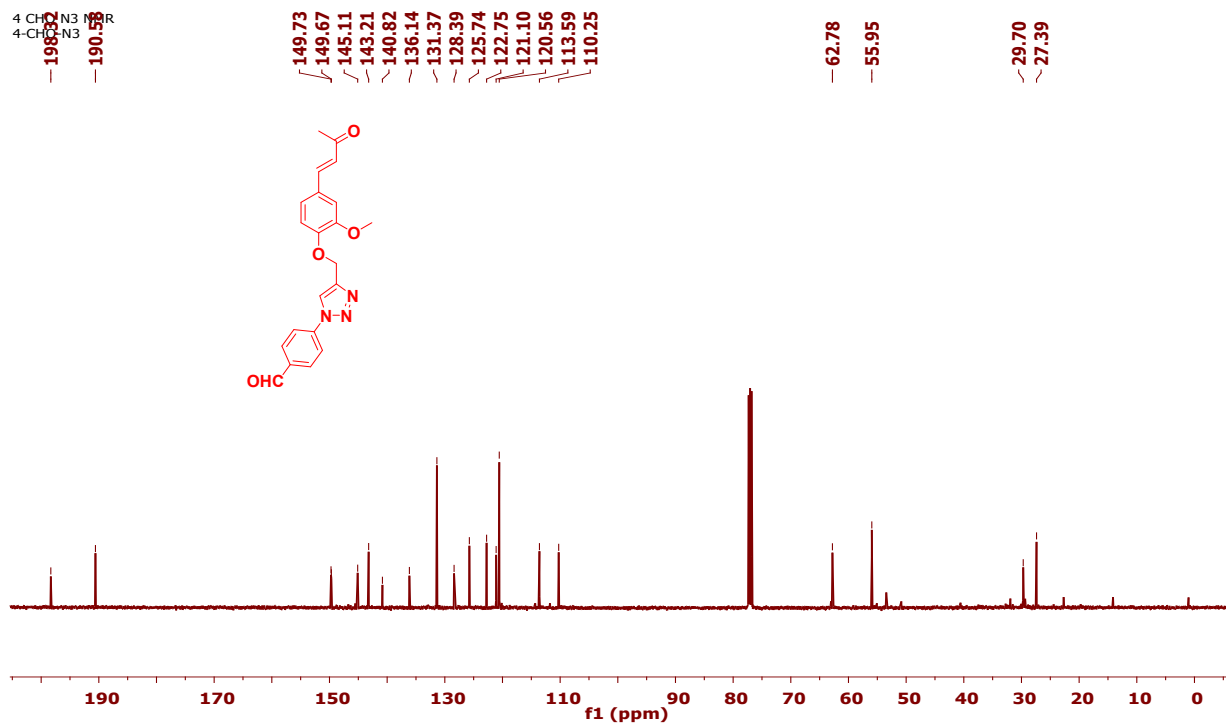



# HPLC AND HRESIMS of 18

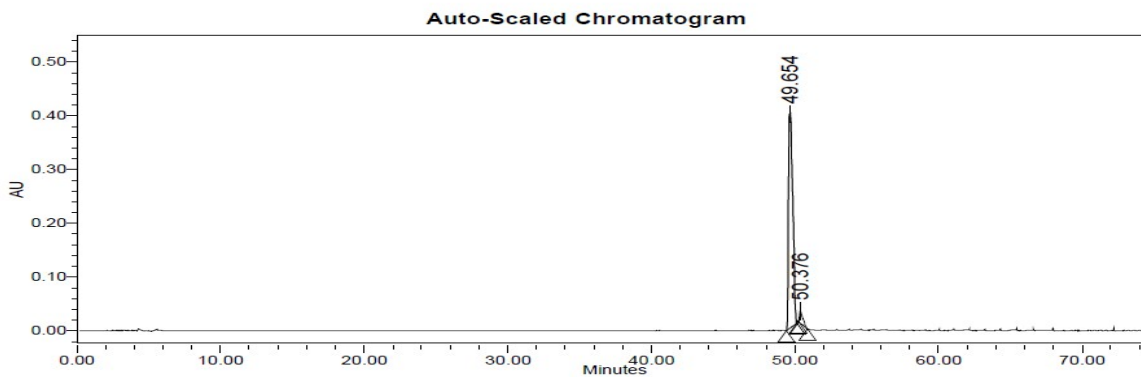

|   | RT     | Area (μV*sec) | % Area | Height (μV) |
|---|--------|---------------|--------|-------------|
| 1 | 49.654 | 8370568       | 95.70  | 400375      |
| 2 | 50.376 | 376084        | 4.30   | 22312       |

## Qualitative Compound Report

|                               |                   |                      |                       |
|-------------------------------|-------------------|----------------------|-----------------------|
| <b>Data File</b>              | Aniline.d         | <b>Sample Name</b>   | Aniline               |
| <b>Sample Type</b>            | Sample            | <b>Position</b>      | Vial 35               |
| <b>Instrument Name</b>        | Instrument 1      | <b>User Name</b>     |                       |
| <b>Acq Method</b>             | vishal_12-01-13.m | <b>Acquired Time</b> | 02-03-2017 PM 3:35:06 |
| <b>IRM Calibration Status</b> | Success           | <b>DA Method</b>     | daily_report.m        |
| <b>Comment</b>                |                   |                      |                       |

|                       |                             |              |
|-----------------------|-----------------------------|--------------|
| <b>Sample Group</b>   |                             | <b>Info.</b> |
| <b>Acquisition SW</b> | 6200 series TOF/6500 series |              |
| <b>Version</b>        | Q-TOF B.05.01 (B5125)       |              |

### Compound Table

| Compound Label       | RT  | Mass     | Formula       | MFG Formula   | MFG Diff (ppm) | DB Formula    |
|----------------------|-----|----------|---------------|---------------|----------------|---------------|
| Cpd 8: C20 H19 N3 O3 | 0.3 | 349.1426 | C20 H19 N3 O3 | C20 H19 N3 O3 | 0.1            | C20 H19 N3 O3 |

| Compound Label       | m/z    | RT  | Algorithm                 | Mass     |
|----------------------|--------|-----|---------------------------|----------|
| Cpd 8: C20 H19 N3 O3 | 350.15 | 0.3 | Find by Molecular Feature | 349.1426 |

### MFE MS Spectrum

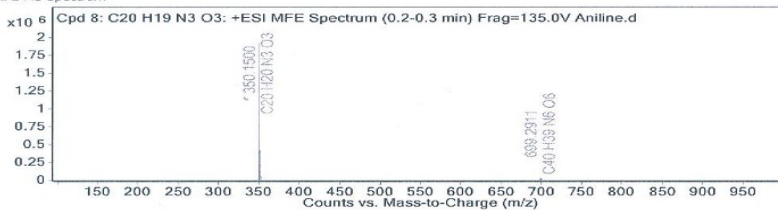

### MS Spectrum Peak List

| m/z      | z | Abund     | Formula       | Ion     |
|----------|---|-----------|---------------|---------|
| 350.15   | 1 | 1924937.5 | C20 H20 N3 O3 | (M+H)+  |
| 351.1526 | 1 | 420266.5  | C20 H20 N3 O3 | (M+H)+  |
| 352.1554 | 1 | 63142.94  | C20 H20 N3 O3 | (M+H)+  |
| 699.2911 | 1 | 37086.18  | C40 H39 N6 O6 | (2M+H)+ |
| 700.2941 | 1 | 17492.96  | C40 H39 N6 O6 | (2M+H)+ |

### Predicted Isotope Match Table

| Isotope | m/z      | Calc m/z | Diff (ppm) | Abund % | Calc Abund % | Abund Sum % | Calc Abund Sum % |
|---------|----------|----------|------------|---------|--------------|-------------|------------------|
| 1       | 350.15   | 350.1499 | -0.14      | 100     | 100          | 79.73       | 79.02            |
| 2       | 351.1526 | 351.153  | 1.03       | 21.83   | 23.07        | 17.41       | 18.23            |
| 3       | 352.1554 | 352.1557 | 0.93       | 3.28    | 3.16         | 2.62        | 2.5              |
| 4       | 353.1576 | 353.1583 | 1.93       | 0.31    | 0.32         | 0.24        | 0.25             |

# $^1\text{H}$ and $^{13}\text{C}$ NMR of 18:

ANILINE NMR  
Aniline-N3

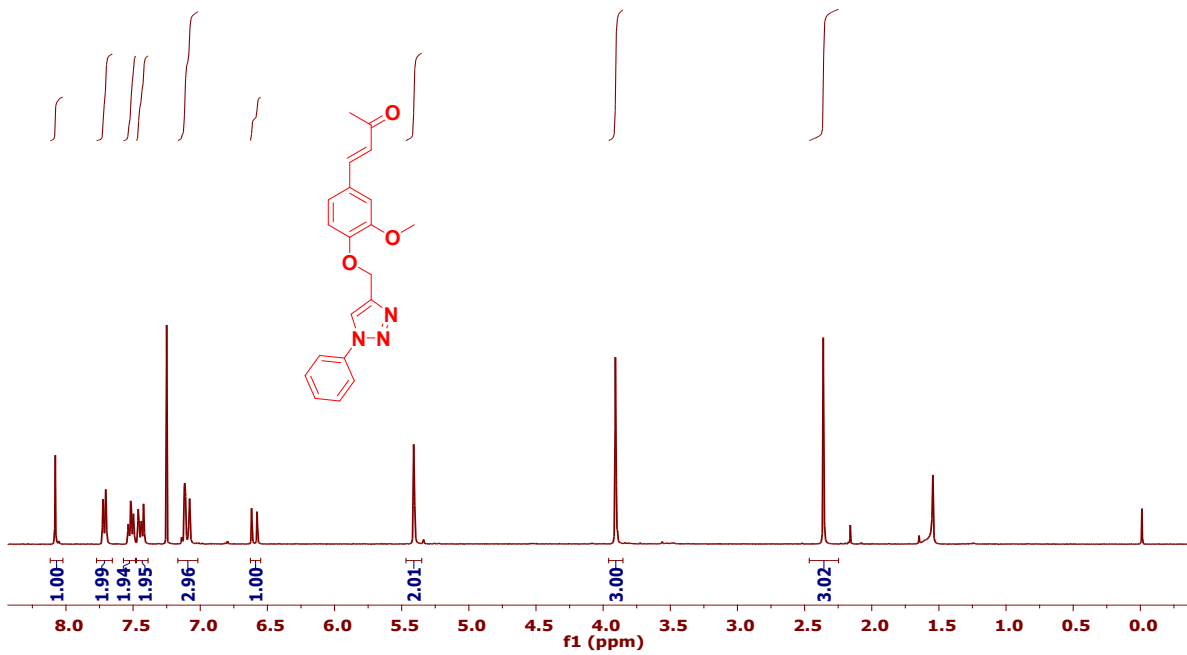

Aniline-c13  
Aniline-N3

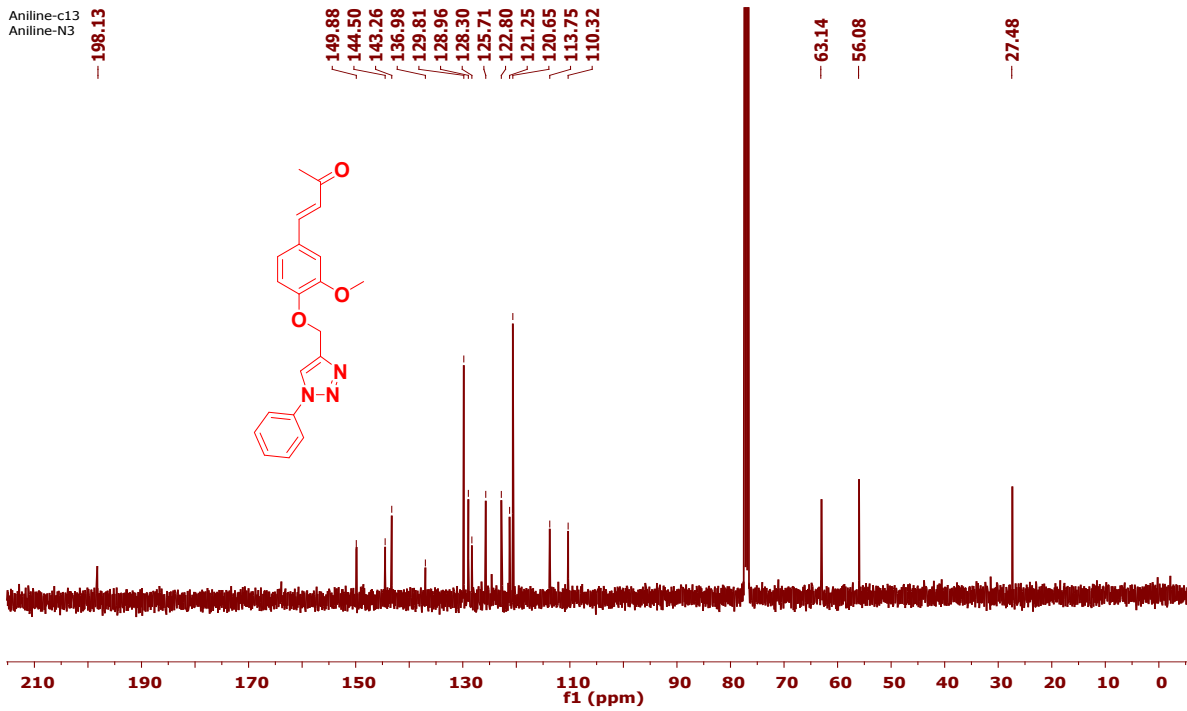

# HPLC AND HRESIMS of 19

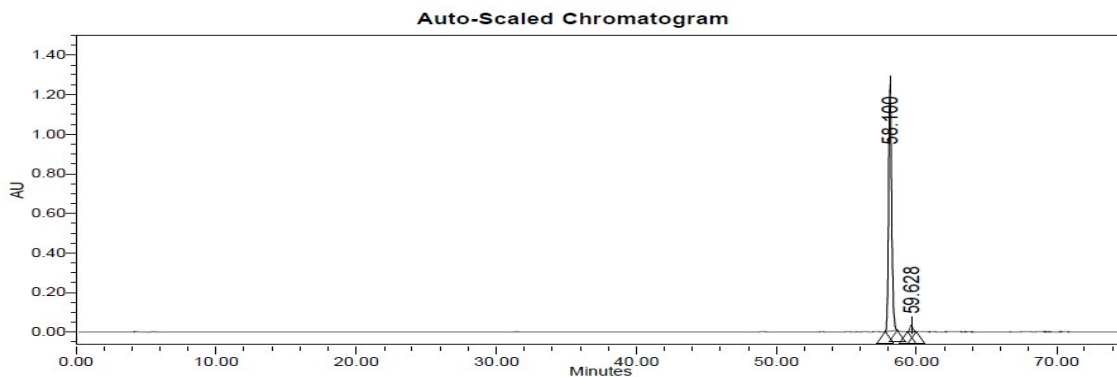

|   | RT     | Area (μV*sec) | % Area | Height (μV) |
|---|--------|---------------|--------|-------------|
| 1 | 58.100 | 19175550      | 97.53  | 1247757     |
| 2 | 59.628 | 486537        | 2.47   | 32357       |

## Qualitative Compound Report

|                               |                   |                      |                       |
|-------------------------------|-------------------|----------------------|-----------------------|
| <b>Data File</b>              | 3-Br-5F-N3.d      | <b>Sample Name</b>   | 3-Br-5F-N3            |
| <b>Sample Type</b>            | Sample            | <b>Position</b>      | Vial 36               |
| <b>Instrument Name</b>        | Instrument 1      | <b>User Name</b>     |                       |
| <b>Acq Method</b>             | vishal_12-01-13.m | <b>Acquired Time</b> | 02-03-2017 PM 3:36:27 |
| <b>IRM Calibration Status</b> | Success           | <b>DA Method</b>     | daily_report.m        |
| <b>Comment</b>                |                   |                      |                       |

|                               |                                                      |              |
|-------------------------------|------------------------------------------------------|--------------|
| <b>Sample Group</b>           |                                                      | <b>Info.</b> |
| <b>Acquisition SW Version</b> | 6200 series TOF/6500 series<br>Q-TOF B.05.01 (B5125) |              |

### Compound Table

| Compound Label             | RT  | Mass     | Formula            | MFG Formula        | MFG Diff (ppm) | DB Formula         |
|----------------------------|-----|----------|--------------------|--------------------|----------------|--------------------|
| Cpd 10: C20 H17 Br F N3 O3 | 0.3 | 445.0433 | C20 H17 Br F N3 O3 | C20 H17 Br F N3 O3 | 0.92           | C20 H17 Br F N3 O3 |

| Compound Label             | m/z      | RT  | Algorithm                 | Mass     |
|----------------------------|----------|-----|---------------------------|----------|
| Cpd 10: C20 H17 Br F N3 O3 | 446.0506 | 0.3 | Find by Molecular Feature | 445.0433 |

### MFE MS Spectrum

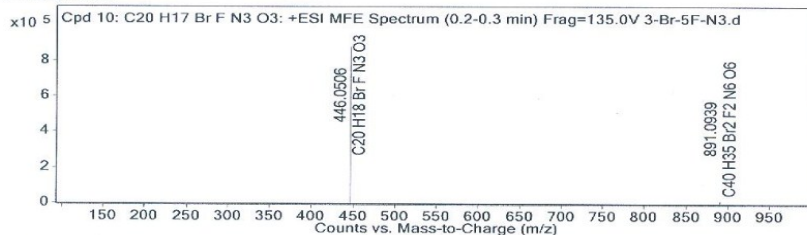

### MS Spectrum Peak List

| m/z      | z | Abund     | Formula              | Ion     |
|----------|---|-----------|----------------------|---------|
| 446.0506 | 1 | 878484.63 | C20 H18 Br F N3 O3   | (M+H)+  |
| 891.0939 | 1 | 16904.63  | C40 H35 Br2 F2 N6 O6 | (2M+H)+ |

### Predicted Isotope Match Table

| Isotope | m/z      | Calc m/z | Diff (ppm) | Abund % | Calc Abund % | Abund Sum % | Calc Abund Sum % |
|---------|----------|----------|------------|---------|--------------|-------------|------------------|
| 1       | 446.0506 | 446.051  | 0.91       | 100     | 100          | 100         | 100              |

# <sup>1</sup>H and <sup>13</sup>C NMR of 19:

3 Br 5 F N3 NMR  
3-Br-5-F-N3

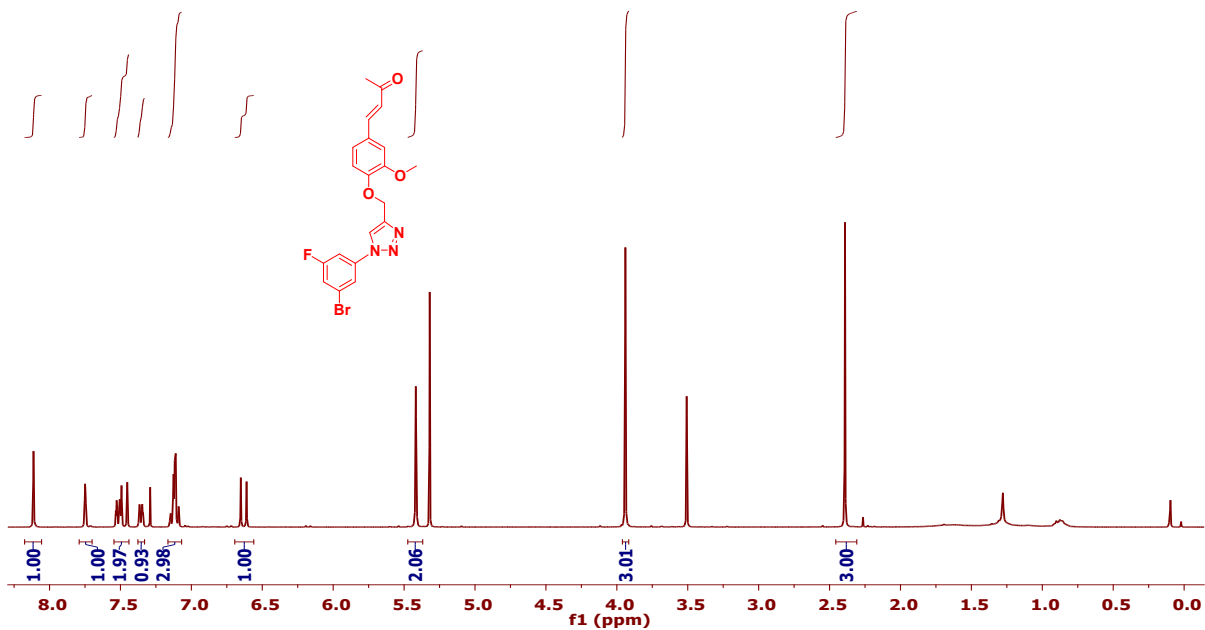

3 Br 5 F N3 NMR  
3-Br-5-F-N3

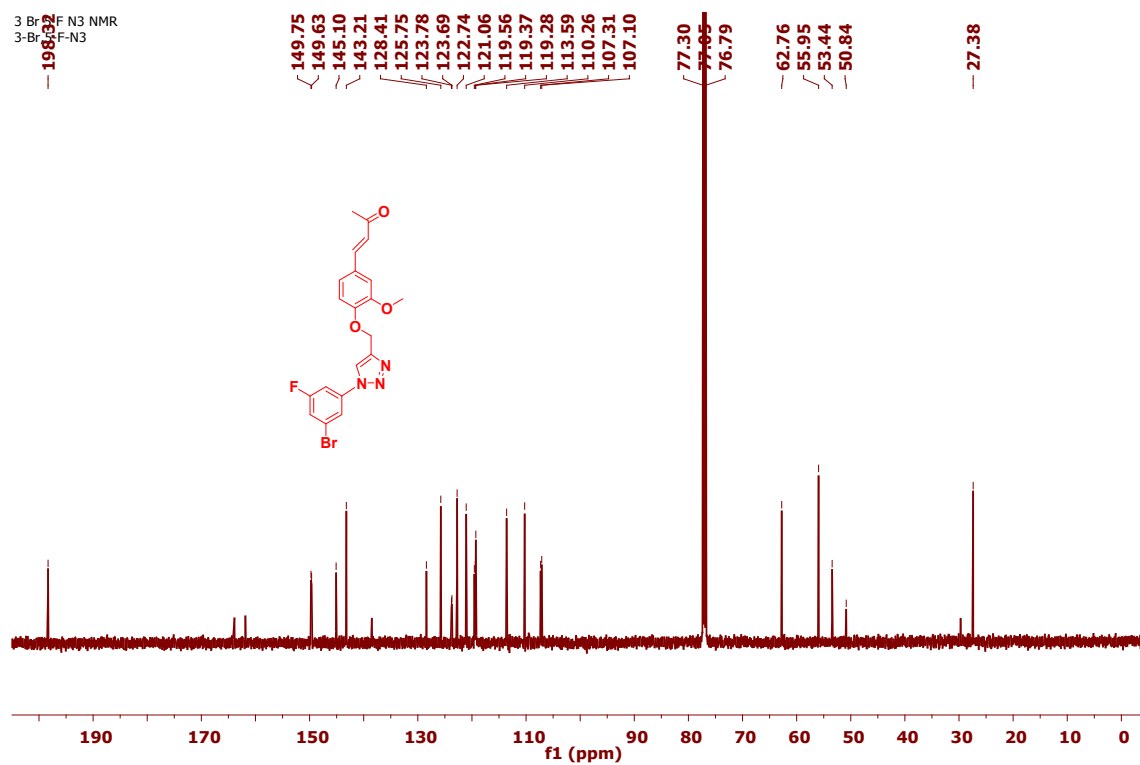

# HPLC AND HRESIMS OF and 20:

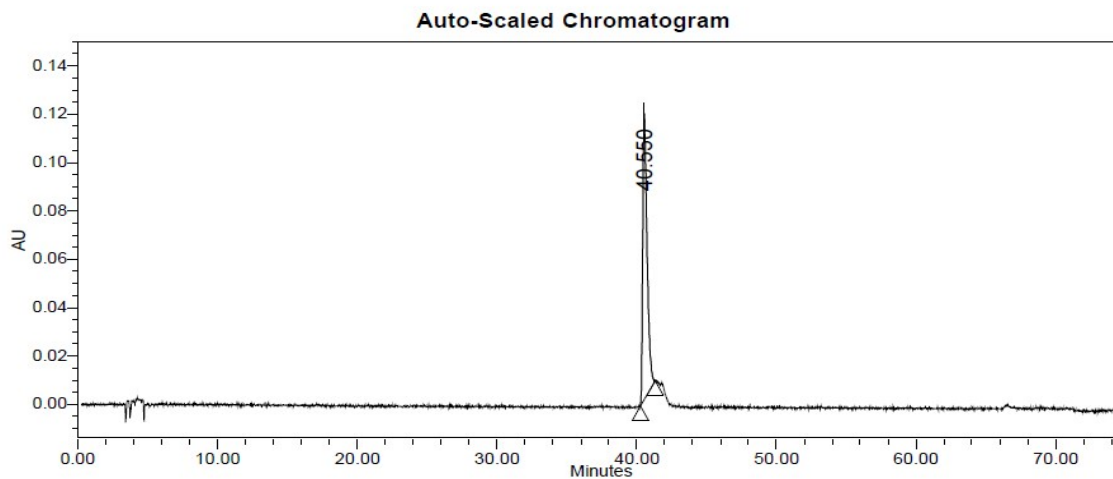

|   | RT     | Area<br>( $\mu\text{V}\cdot\text{sec}$ ) | % Area | Height<br>( $\mu\text{V}$ ) |
|---|--------|------------------------------------------|--------|-----------------------------|
| 1 | 40.550 | 2514012                                  | 100.00 | 118268                      |

## Qualitative Compound Report

|                               |                   |                      |                        |
|-------------------------------|-------------------|----------------------|------------------------|
| <b>Data File</b>              | 2-NH2OH.d         | <b>Sample Name</b>   | 2-NH2OH                |
| <b>Sample Type</b>            | Sample            | <b>Position</b>      | Vial 3                 |
| <b>Instrument Name</b>        | Instrument 1      | <b>User Name</b>     |                        |
| <b>Acq Method</b>             | vishal_12-01-13.m | <b>Acquired Time</b> | 09-03-2017 PM 12:51:13 |
| <b>IRM Calibration Status</b> | Success           | <b>DA Method</b>     | daily_report.m         |
| <b>Comment</b>                |                   |                      |                        |

|                       |                             |              |
|-----------------------|-----------------------------|--------------|
| <b>Sample Group</b>   |                             | <b>Info.</b> |
| <b>Acquisition SW</b> | 6200 series TOF/6500 series |              |
| <b>Version</b>        | Q-TOF B.05.01 (B5125)       |              |

### Compound Table

| Compound Label       | RT  | Mass     | Formula       | MFG Formula   | MFG Diff (ppm) | DB Formula    |
|----------------------|-----|----------|---------------|---------------|----------------|---------------|
| Cpd 9: C20 H19 N3 O4 | 0.3 | 365.1378 | C20 H19 N3 O4 | C20 H19 N3 O4 | -0.76          | C20 H19 N3 O4 |

| Compound Label       | m/z     | RT  | Algorithm                 | Mass     |
|----------------------|---------|-----|---------------------------|----------|
| Cpd 9: C20 H19 N3 O4 | 366.145 | 0.3 | Find by Molecular Feature | 365.1378 |

### MFE MS Spectrum

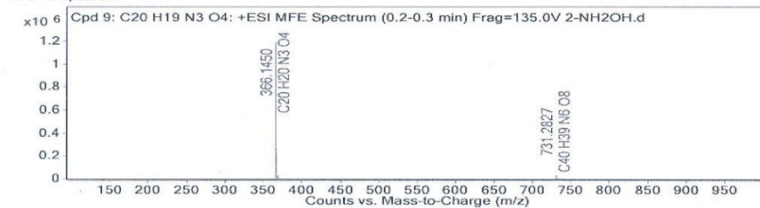

### MS Spectrum Peak List

| m/z      | z | Abund     | Formula       | Ion     |
|----------|---|-----------|---------------|---------|
| 366.145  | 1 | 1192157   | C20 H20 N3 O4 | (M+H)+  |
| 367.1487 | 1 | 260299.53 | C20 H20 N3 O4 | (M+H)+  |
| 368.1509 | 1 | 34069.24  | C20 H20 N3 O4 | (M+H)+  |
| 731.2827 | 1 | 31077.24  | C40 H39 N6 O8 | (2M+H)+ |
| 732.2861 | 1 | 16645.95  | C40 H39 N6 O8 | (2M+H)+ |

### Predicted Isotope Match Table

| Isotope | m/z      | Calc m/z | Diff (ppm) | Abund % | Calc Abund % | Abund Sum % | Calc Abund Sum % |
|---------|----------|----------|------------|---------|--------------|-------------|------------------|
| 1       | 366.145  | 366.1448 | -0.44      | 100     | 100          | 80.2        | 79.06            |
| 2       | 367.1487 | 367.1479 | -2.17      | 21.83   | 23.11        | 17.51       | 18.27            |
| 3       | 368.1509 | 368.1505 | -1.09      | 2.86    | 3.37         | 2.29        | 2.67             |

# <sup>1</sup>H and <sup>13</sup>C NMR of 20:

2-NH2-PHENOL N3 NMR  
2-NH2-OH

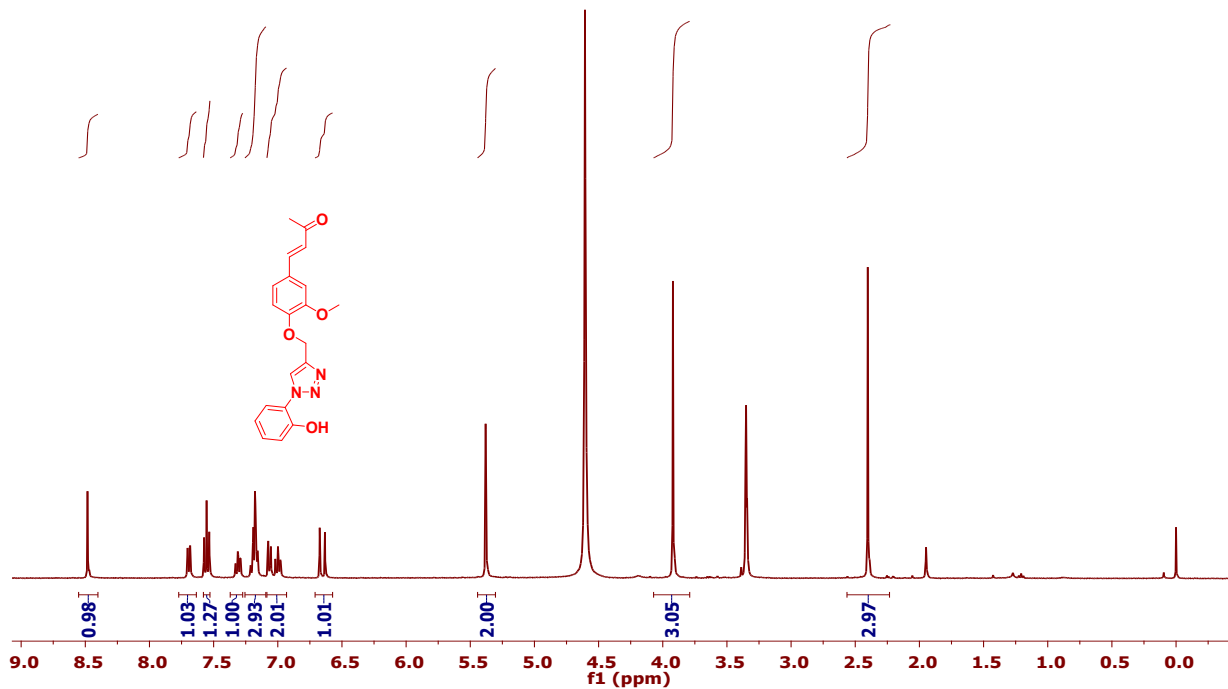

2-NH2-PHENOL N3 c13  
2-NH2-OH

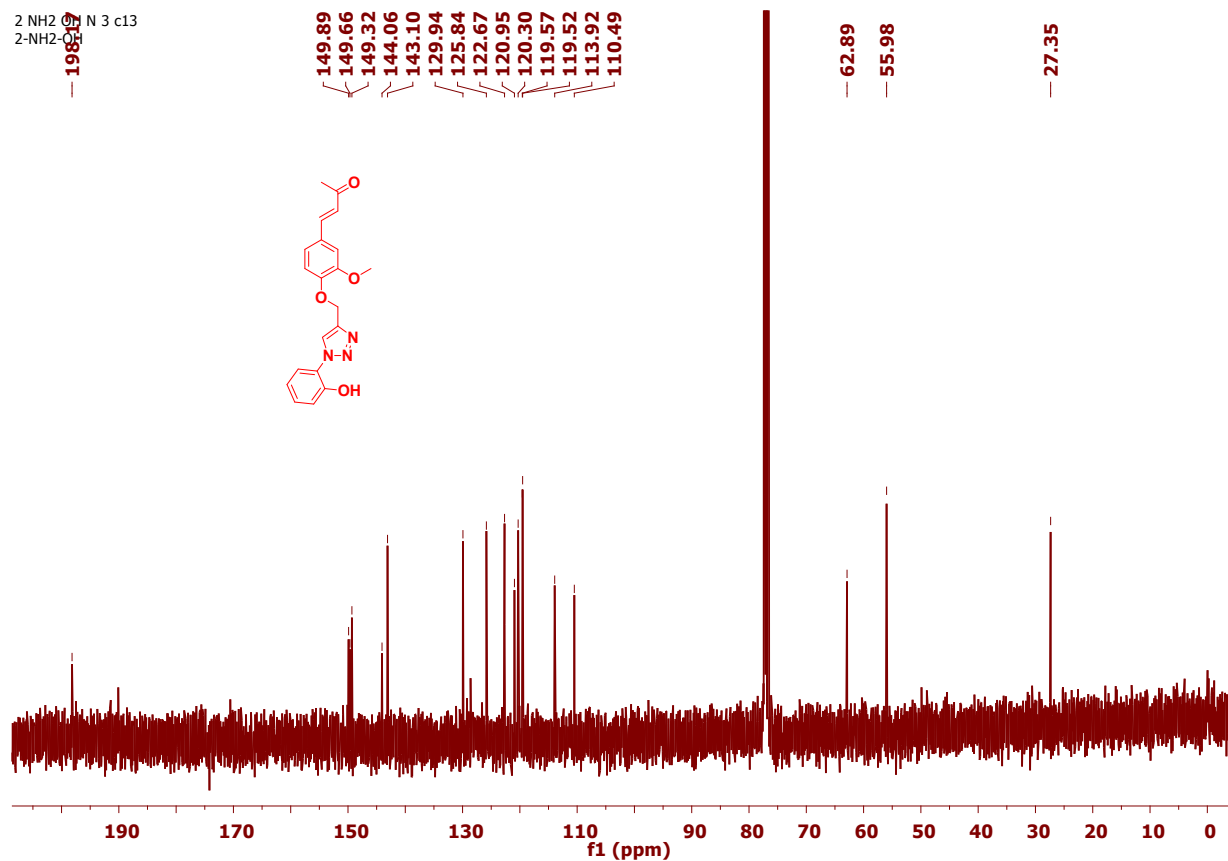

Supplement: MD-008-C7MD00267J-s001.pdf [file MD-008-C7MD00267J-s001.pdf]
